# Supplementary material for: Is disease activity associated with social support and psychological distress in Crohn’s disease patients? Results of a cross-sectional study in a Chinese hospital population
Source: PubMed Central journal article supplement — BMJ Open. 2023 Oct 25;13(10):e076219. doi: 10.1136/bmjopen-2023-076219 (PMC10603502; doi:10.1136/bmjopen-2023-076219), 2023-10-25
Supplement: bmjopen-2023-076219.draft_revisions.pdf [file bmjopen-2023-076219.draft_revisions.pdf]

# BMJ Open

BMJ Open is committed to open peer review. As part of this commitment we make the peer review history of every article we publish publicly available.

When an article is published we post the peer reviewers' comments and the authors' responses online. We also post the versions of the paper that were used during peer review. These are the versions that the peer review comments apply to.

The versions of the paper that follow are the versions that were submitted during the peer review process. They are not the versions of record or the final published versions. They should not be cited or distributed as the published version of this manuscript.

BMJ Open is an open access journal and the full, final, typeset and author-corrected version of record of the manuscript is available on our site with no access controls, subscription charges or pay-per-view fees (<http://bmjopen.bmj.com>).

If you have any questions on BMJ Open's open peer review process please email [info.bmjopen@bmj.com](mailto:info.bmjopen@bmj.com)

# BMJ Open

## Association between disease activity and psychological change among Crohn's disease: a cross-sectional study

|                               |                                                                                                                                                                                                                                                                                                                                                                                                                                                                                                                                                                                                                                                                                                                                                                    |
|-------------------------------|--------------------------------------------------------------------------------------------------------------------------------------------------------------------------------------------------------------------------------------------------------------------------------------------------------------------------------------------------------------------------------------------------------------------------------------------------------------------------------------------------------------------------------------------------------------------------------------------------------------------------------------------------------------------------------------------------------------------------------------------------------------------|
| Journal:                      | <i>BMJ Open</i>                                                                                                                                                                                                                                                                                                                                                                                                                                                                                                                                                                                                                                                                                                                                                    |
| Manuscript ID                 | bmjopen-2023-076219                                                                                                                                                                                                                                                                                                                                                                                                                                                                                                                                                                                                                                                                                                                                                |
| Article Type:                 | Original research                                                                                                                                                                                                                                                                                                                                                                                                                                                                                                                                                                                                                                                                                                                                                  |
| Date Submitted by the Author: | 02-Jun-2023                                                                                                                                                                                                                                                                                                                                                                                                                                                                                                                                                                                                                                                                                                                                                        |
| Complete List of Authors:     | Huang, mengting; Huazhong University of Science and Technology<br>Tu, Lei; Huazhong University of Science and Technology<br>Wu, Linxia; Huazhong University of Science and Technology<br>Zou, Yan; Huazhong University of Science and Technology<br>Li, Xin; Huazhong University of Science and Technology<br>Yue, Xiaofei; Huazhong University of Science and Technology<br>Huang, Chen; Huazhong University of Science and Technology<br>Lei, Ping; Huazhong University of Science and Technology<br>Li, Qian; Huazhong University of Science and Technology<br>Han, Ping; Huazhong University of Science and Technology<br>Yang, Lian; Huazhong University of Science and Technology, Radiology<br>Zhu, Liangru; Huazhong University of Science and Technology, |
| Keywords:                     | Coeliac disease < GASTROENTEROLOGY, Inflammatory bowel disease < GASTROENTEROLOGY, MENTAL HEALTH                                                                                                                                                                                                                                                                                                                                                                                                                                                                                                                                                                                                                                                                   |
|                               |                                                                                                                                                                                                                                                                                                                                                                                                                                                                                                                                                                                                                                                                                                                                                                    |

SCHOLARONE™  
Manuscripts

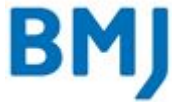

I, the Submitting Author has the right to grant and does grant on behalf of all authors of the Work (as defined in the below author licence), an exclusive licence and/or a non-exclusive licence for contributions from authors who are: i) UK Crown employees; ii) where BMJ has agreed a CC-BY licence shall apply, and/or iii) in accordance with the terms applicable for US Federal Government officers or employees acting as part of their official duties; on a worldwide, perpetual, irrevocable, royalty-free basis to BMJ Publishing Group Ltd ("BMJ") its licensees and where the relevant Journal is co-owned by BMJ to the co-owners of the Journal, to publish the Work in this journal and any other BMJ products and to exploit all rights, as set out in our [licence](#).

The Submitting Author accepts and understands that any supply made under these terms is made by BMJ to the Submitting Author unless you are acting as an employee on behalf of your employer or a postgraduate student of an affiliated institution which is paying any applicable article publishing charge ("APC") for Open Access articles. Where the Submitting Author wishes to make the Work available on an Open Access basis (and intends to pay the relevant APC), the terms of reuse of such Open Access shall be governed by a Creative Commons licence – details of these licences and which [Creative Commons](#) licence will apply to this Work are set out in our licence referred to above.

Other than as permitted in any relevant BMJ Author's Self Archiving Policies, I confirm this Work has not been accepted for publication elsewhere, is not being considered for publication elsewhere and does not duplicate material already published. I confirm all authors consent to publication of this Work and authorise the granting of this licence.

## Association between disease activity and psychological change among Crohn's disease: a cross-sectional study

Mengting Huang<sup>1,2\*</sup>, Lei Tu<sup>3\*</sup>, Linxia Wu<sup>1,2</sup>, Yan Zou<sup>1,2</sup>, Xin Li<sup>1,2</sup>, Xiaofei Yue<sup>1,2</sup>, Chen Huang<sup>1,2</sup>, Ping Lei<sup>1,2</sup>, Qian Li<sup>1,2</sup>, Ping Han<sup>1,2</sup>, Lian Yang<sup>1,2#</sup>, Liangru Zhu<sup>3#</sup>

<sup>1</sup> Department of Radiology, Union Hospital, Tongji Medical College, Huazhong University of Science and Technology, Wuhan, 430022, China

<sup>2</sup> Hubei Province Key Laboratory of Molecular Imaging, Wuhan, 430022, China

<sup>3</sup> Division of Gastroenterology, Union Hospital, Tongji Medical College, Huazhong University of Science and Technology, Wuhan, China

\*Corresponding author:

Liangru Zhu, Ph.D

E-mail: zhuliangru@hust.edu.cn

Institutional affiliations: 1. Division of Gastroenterology, Union Hospital, Tongji Medical College, Huazhong University of Science and Technology, Wuhan, China

\*Co-Corresponding author:

Lian Yang, PhD

Email: yanglian@hust.edu.cn

Institutional affiliations: 1. Department of Radiology, Union Hospital, Tongji Medical College, Huazhong University of Science and Technology, Wuhan, 430022, China; 2. Hubei Province Key Laboratory of Molecular Imaging, Wuhan, 430022, China.

### Abstract

**Objective:** To assess the relative of social support and psychological distress in disease activity among Crohn's disease (CD) patients.

**Design:** Cross-sectional study.

**Setting:** A prospective study of adults recruited in China between March 2020 and March 2022.

**Participants:** A total of 184 patients with CD at Union Hospital, Tongji Medical College, Huazhong University of Science and Technology were enrolled in this study; of these, 162 patients were included in the final analysis.

**Results:** A total of 162 CD patients (active 93, inactive 69) were enrolled. Compared with the inactive CD group, the active CD group had higher CRP ( $P=0.001$ ), anemia ( $P<0.001$ ) and relapse rates in the last year ( $P<0.001$ ). Independent samples  $t$  tests indicated that the active CD group reported lower SSRS scores and higher SCL-90 scores than the inactive CD group. Moreover, men with CD had lower somatization ( $P=0.030$ ) and anxiety ( $P=0.050$ ) scores than women. In binary logistic regression models, the subjective support (Beta=0.903,  $P=0.013$ ), the clinical factors of C-reactive protein (Beta=1.038,  $P=0.001$ ) and psychological distress factors of anxiety (Beta=1.443,  $P=0.008$ ) and other (Beta=1.235,  $P=0.042$ ) were disease activity predictors.

**Conclusion:** The findings highlight the importance of the psychological distress and social support factors that may play a role in CD patients' health. Further exploration of these factors in longitudinal and intervention studies may help to develop effective CD management models.

**STRENGTHS AND LIMITATIONS OF THIS STUDY:**

This was a prospective study of patients with CD recruited from a single medical centre in China over a 2-year period. A cross-sectional study highlighted the importance of psychological change factors that may play a role in CD patients' health.

However, this cross-sectional study could not address the causality between disease activity and psychological change factors of patients with CD.

**Keywords:** Crohn's disease, social support, psychological distress, anxiety

For peer review only

## Introduction

Crohn's disease (CD) is a chronic, nonspecific intestinal inflammatory disease characterized by recurrent abdominal pain and diarrhea that peaks in young adulthood(1). In addition to gastrointestinal manifestations, CD patients experience other systemic manifestations and complications. In recent years, the incidence of CD has increased rapidly in China(2, 3). Due to bowel damage and a long medical history, patients have a high prevalence of psychological impairment, such as anxiety and depression, compared to the general population(4, 5).

Although medical treatments are effective in controlling gastrointestinal inflammation, the relapsing behavior of CD can cause psychological disorders. Moreover, CD patients typically require lifelong medication, which seriously affects their quality of life and increases psychological distress. CD is associated with high medical costs, high rates of psychological disorders, and illness burdens associated with reduced productivity and activity. Studies have shown that approximately 20% of inflammatory bowel disease patients may have symptoms of anxiety, and approximately 15% have symptoms of depression(6, 7). Healthcare services for CD are more demanding and costly for patients with symptoms of anxiety and depression. Xu et al. reported that poor sleep quality, anxiety and depression were related to having active IBD(8). In addition, disease activity was found to be associated with depression and anxiety, and psychological distress may increase the likelihood of disease relapse(9). However, most previous studies have focused on anxiety or depression, rarely focusing on other dimensions. Social support might be another dimension that plays a role in disease severity. Interestingly, there are few studies on the association between social support and disease activity in CD patients(10).

The aim of this study was to investigate the relative effects of social support and psychological distress on disease activity in patients with CD. In addition, we considered whether sex moderates the relationship between disease activity and social support and psychological distress in CD. Previous studies of IBD patients have found that older patients have higher symptoms of anxiety and depression. Therefore, in this study, age was used as a control variable. Thus, we proposed the following hypotheses: social support and psychological distress are correlated with disease activity, and there are differences in social support and psychological distress between men and women.

## Methods

### Ethical aspects

This study was approved by the institutional ethics committee of Tongji Medical College of Huazhong University of Science and Technology, and consent was acquired from all participants. All participants were informed of the purpose and methods of this study and provided written informed consent.

### Participants

This study was a cross-sectional, single-center study. Participants were recruited between March 2020 and March 2022 at Union Hospital, Tongji Medical College, Huazhong University of Science and Technology in China. The inclusion criteria were patients with a diagnosis of CD(11), adult patients (aged 18 years or more), patients with sufficient ability in spoken and written Chinese to complete all the questionnaires, patients without a diagnosis of concomitant mental disorders or dementia and patients not taking medication for CD. The exclusion criteria were as follows: (1) patients who could not complete the questionnaires; (2) patients who had tumors or other medical comorbidities; and (3) patients who were pregnant. The flow diagram of the enrolled patients and healthy controls is shown in Figure 1.

### Data collection

Clinical and demographic data were collected, including age, sex, body mass index, employment status, living status, educational status, marital status and disease duration. The severity of CD was assessed using Crohn's disease activity index (CDAI) scores(12). A CDAI score of less than 150 was defined as disease inactivity. A CDAI score of 150 or more was defined as disease activity.

Social support was assessed using the Social Support Rating Scale (SSRS)(13, 14). The participants' social support was evaluated by the Chinese version of the SSRS, which was previously demonstrated to have reliability and validity. It can measure the characteristics of social support and its relationship with participants' mental health levels, mental illness and various physical diseases. The scale has 10 items, including items regarding objective support (3 items), subjective support (4 items) and the utilization of social support (3 items). The total score ranges from 11-59 and is acquired by adding the scores of each item. Lower scores on indices of the SSRS indicate less social support.

Psychological state was assessed using the Symptom Checklist-90 (SCL-90)(15, 16). The scale has a total of 90 items regarding a wide range of psychiatric symptoms, including feelings, emotions, thinking, consciousness, behaviors, habits, interpersonal relationships, diet and sleep. Ten factors are used to reflect 10 aspects of psychological symptoms, including psychoticism, paranoid ideation, phobic anxiety, hostility, anxiety, depression, interpersonal sensitivity, obsessive compulsive behaviors, and somatization. The statistical standard of the SCL-90 mainly consists of two items: the total score and the various factor scores. The total score is the sum of the scores of the 90 items, which reflects the severity of the disease. The factor score is the average score of all factors, which ranges from "0" ("no problem") to "4" ("very serious"). Each factor reflects a certain aspect of the participant's symptoms, so the symptom distribution characteristics of the participants can be understood through the factor score. According to the results of the Chinese norm, if the total score exceeds 160 points, the positive items exceed 43 points, or any factor scores exceeds 2 points, the participants is considered to have a positive screening, and further examination is needed. This version has excellent internal consistency for all items.

### Statistical analysis

All statistical analyses were performed in SPSS 26.0, GraphPad Prism 8.0 and Origin 2021 software. The independent sample T test was used to determine the relationship between disease status and sex differences and scale factors. Correlation analysis was applied to evaluate the relationship among the clinical, psychological, and social support factors. Hierarchical multiple regression analysis (MRA) was used to examine the unique contribution of participant characteristics, psychological distress scores and SSRS factor scores on the composite factors of disease status.  $P < 0.05$  was considered statistically significant.

## Results

### Sample characteristics

A total of 162 CD patients with complete survey responses were analyzed (active n=93, inactive n=69). Participants in the disease active group reported a disease course of 13 months, and those in the inactive group reported a disease course of 11 months. The Independent Sample T test and Chi Square Tests indicated no statistically significant difference in age, employment status, living status, marital status or years of education between the two groups. Compared with the inactive CD group, the active CD group had higher CRP ( $P=0.001$ ) and ESR values( $P<0.001$ ). In addition, these patients tended to have higher anemia rate and relapse rates in the last year ( $P<0.001$ ), which is shown in Table 1. Independent samples t tests indicated differences between the two groups,

1  
2  
3 with the active CD group reporting lower SSRS scores and higher SCL-90 scores than the inactive CD group, which  
4 is shown in Table 2. Moreover, women showed higher levels of somatization ( $P=0.030$ ) and anxiety ( $P=0.050$ ) than  
5 men, as shown in Table 2.  
6  
7

### 8 **Preliminary analyses**

9  
10 Figure 2 shows the correlation between social support and the psychological distress scale. The results showed  
11 that objective support was negatively correlated with psychological distress (obsessive-compulsive, interpersonal  
12 sensitivity, anxiety, hostility, phobic anxiety, paranoid, psychoticism and other factors) ( $P<0.05$ ). Subjective support  
13 was negatively correlated with psychological distress (somatization, obsessive-compulsive, interpersonal sensitivity,  
14 depression, anxiety, hostility, phobic anxiety, paranoid, psychoticism and other) ( $P<0.05$ ). Availability was negatively  
15 correlated with psychological distress (somatization, obsessive-compulsive, interpersonal sensitivity, depression,  
16 anxiety, hostility, paranoid, psychoticism and other factors) ( $P<0.05$ ).  
17  
18  
19

### 20 **Binary logistic regression models**

21  
22 Univariate analysis suggested that C-reactive protein levels( $P=0.001$ ), somatization ( $P=0.007$ ), obsessive  
23 compulsiveness ( $P<0.001$ ), interpersonal sensitivity ( $P<0.001$ ), depression ( $P<0.001$ ), anxiety ( $P=0.039$ ), hostility  
24 ( $P=0.015$ ), phobic anxiety ( $P=0.002$ ), paranoid ( $P=0.001$ ), psychoticism ( $P<0.001$ ), other factors ( $P<0.001$ ) and  
25 subjective support ( $P=0.003$ ) were statistically significant and were included in the subsequent binary logistic  
26 regression analysis. Binary logistic regression analyses showed that the social support factors of subjective support  
27 (Beta=0.903,  $P=0.013$ ), the clinical factors of C-reactive protein levels (Beta=1.038,  $P=0.001$ ), the and psychological  
28 distress factors of anxiety (Beta=1.443,  $P=0.008$ ) and other factors (Beta=1.235,  $P=0.042$ ) were predictors of disease  
29 activity, as shown in Table 3.  
30  
31  
32

### 33 **Discussion**

34  
35 In this study, we described clinical, social support and psychological distress differences, and we also assessed  
36 the relationships between disease activity and dimensions of psychological distress and social support symptoms in a  
37 cohort of CD patients. As we previously hypothesized, our present results showed that active CD patients had higher  
38 SCL-90 and lower SSRS scores than inactive CD patients, and social support factors were related to psychological  
39 distress factors, both of which had an impact on disease activity. We also found that women showed higher levels of  
40 somatization and anxiety than men, but this was not observed for social support. Finally, we found that C-reactive  
41 protein, subjective support, anxiety and other factors were relevant determinants of disease activity in CD patients.  
42

43  
44 Psychological factors such as anxiety and depression have been studied in relation to CD (17), but the roles of  
45 other factors such as social support has been poorly investigated. The high correlations of social support factors with  
46 psychological distress symptoms in CD patients are consistent with a previous study about other illnesses (18) and  
47 indicate that the three factors of social support are likely a concept that reflects another dimension of psychological  
48 states. Social support is defined as behavioral or emotional support provided by family members, other people or  
49 other groups. Social support can be divided into three categories: objective support, subjective support and  
50 availability(19). However, in populations of patients with chronic disease, there are individual differences in the use of  
51 social support. Some people can receive support at any time but refuse the help of others. In addition, interpersonal  
52 support is a process of individual interaction. Past research has shown that social support has different effects on  
53 different diseases.  
54  
55  
56  
57  
58  
59  
60



1  
2  
3 Consistent with previous research, the depressive, anxiety and somatization factors of patients with CD are  
4 different for different disease severities(20, 21). The three factors of social support are negatively correlated with  
5 psychological distress (somatization, anxiety, anxiety and other factors). Somatization mainly reflects the subjective  
6 body discomfort of patients, including discomfort due to cardiovascular, gastrointestinal, respiratory and other  
7 systems, as well as headaches, backaches and muscle soreness. Interestingly, the relationship between disease  
8 severity and most psychological distress and social support factors in addition to anxiety and subjective support  
9 factors was no longer significant after including social support factors in the model.  
10  
11

12 In binary logistic regression models, we also found that subjective support factors, anxiety, other psychological  
13 distress factors and C-reactive protein remained a significant predictors of disease severity, which may be related to  
14 the fluctuating course of progression and remission that characterizes this disease. Namely, patients with CD attach  
15 particular importance to their own subjective feelings and may be inclined to interpret any physical or subjective  
16 discomfort they experience as a sign of psychological distress, leading them to report lower levels of subjective  
17 support. However, these lower levels of subjective support result in worsening disease activity. This biopsychosocial  
18 explanation is consistent with what has been found in people with CD(22, 23).  
19  
20

21 In our study, the the psychological dimension data were obtained from the SCL-90. The results indicate that the  
22 psychological state of active CD patients is affected in some dimensions, compared with inactive CD patients. This is  
23 consistent with the results of Goodhand, J.R., et al. (24). Neither active nor inactive CD patients met the criteria for  
24 anxiety and depression in our study. In recent years, an increasing number of doctors have realized that  
25 psychological disorders are common in inflammatory bowel disease patients and may affect the disease condition  
26 and quality of life(13, 25). However, the etiology of psychological disorders appears to be multifactorial; for example,  
27 environmental factors may include stressful life events, disease activity, disease course, medications, income or  
28 marital status(26, 27). Regarding clinical factors, the inflammatory performance of CD may play a role in disease  
29 activity and quality of life. Active CD patients had higher anemia rates, CRP values, ESR values and relapse rates. It  
30 is possible to improve the psychological state and quality of life of patients with CD through early identification and  
31 intervention.  
32  
33  
34

35 Consistent with previous research, women with CD tend to report greater depressive symptoms than men(21,  
36 28). To our knowledge, this is the first study to compare the relationship between social support and disease activity  
37 across men and women with CD. The strengths of this study include the diversity of the sample in terms of social  
38 support and psychological distress scores, which allowed us to assess somatization in patients with different levels of  
39 disease activity.  
40  
41

42 Several limitations should be considered in this study. First, this was a single-center study in which all  
43 participants were of Han nationality and from Hubei Province, China. Second, the cross-sectional nature of the data  
44 precludes us from drawing conclusions about the causality of the relationships among social support, psychological  
45 distress and disease activity. In the future, longitudinal research should be conducted to establish a more robust  
46 connection between various clinical, psychological and social support factors and disease activity in CD patients.  
47  
48  
49

## 50 **Conclusions**

51 In conclusion, this study indicates the importance of considering a broader range of psychological distress and  
52 social support factors that may play a role in the health of patients with CD. Further exploration of these factors in  
53 longitudinal and intervention studies may help to develop effective CD management models.  
54  
55  
56  
57  
58  
59  
60

1  
2  
3 **Contributors** M.T.H and L.T substantial contributions to the conception, design, acquisition, analysis, and  
4 interpretation of data for the work. The also drafting the work or revising it critically for important intellectual content.  
5 L.X.W, Y.Z, X.L, X.F.Y and C.H substantial contributions to the acquire and interpretation of data for the work. P.L,  
6 Q.L and P.H substantial contributions to the revising it critically for important intellectual content. L.Y and L.R.Z  
7 substantial contributions to the conception, design and agreement to be accountable for all aspects of the work in  
8 ensuring that questions related to the accuracy or integrity of any part of the work are appropriately investigated and  
9 resolved.  
10

11  
12 **Funding** This research were supported by Natural Science Foundation of Hubei Province(2021CFB450) and Wuhan  
13 Knowledge Innovation Special Basic Research Project (2022020801010462).  
14

15 **Disclaimer** The funding sources had no role in the study conduct, data collection, analyses, data interpretation and  
16 the decision to submit the manuscript.  
17

18 **Competing interests** None declared.

19 **Patient consent for publication** All participants were informed of the purpose and methods of this study and  
20 provided written informed consent.

21 **Ethics approval** This study was approved by the institutional ethics committee of Tongji Medical College of  
22 Huazhong University of Science and Technology.  
23

24 **Conflict of Interest** The authors of this manuscript declare no relationships with any companies, whose products or  
25 services may be related to the subject matter of the article.  
26

27 **Statistics and Biometry:**

28 No complex statistical methods were necessary for this paper.  
29  
30  
31  
32  
33  
34  
35  
36  
37  
38  
39  
40  
41  
42  
43  
44  
45  
46  
47  
48  
49  
50  
51  
52  
53  
54  
55  
56  
57  
58  
59  
60

Figure 1: Flow diagram of the enrolled patients.

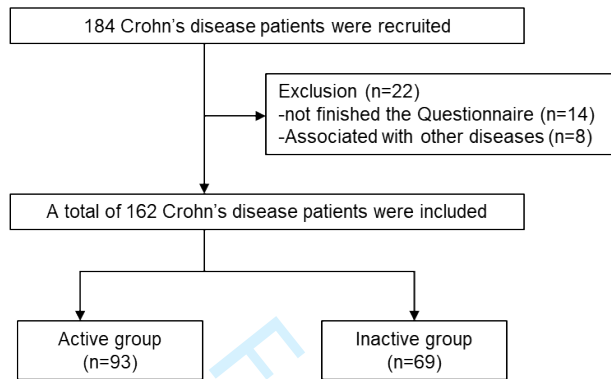

Figure 2. Analysis of the correlation of clinical data with social support and psychological factors

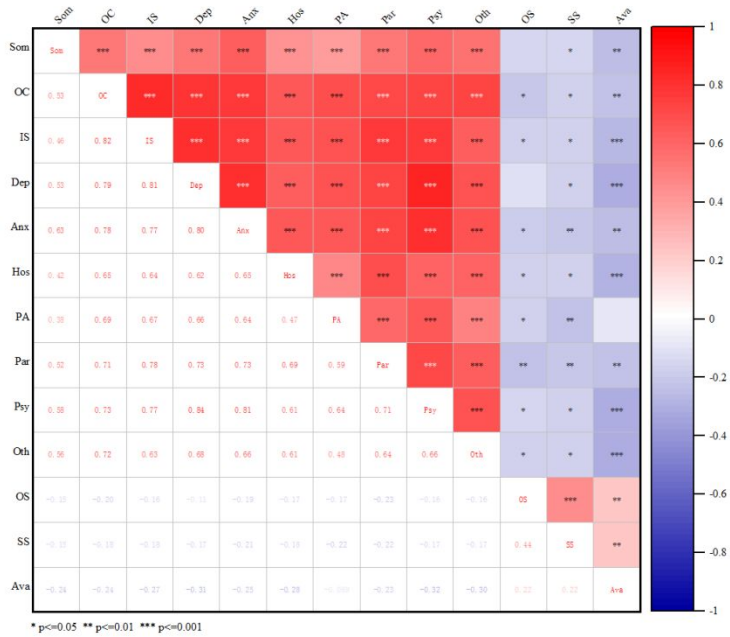

Note: Som=somatization, OC=obsessive-compulsive, IS=interpersonal sensitivity, Dep=depression, Anx=anxiety, Hos=hostility, PA=phobic anxiety, Par=paranoid, Psy=psychoticism, Oth=other, OS=objective support, SS=subjective support, Ava=availability.

Table 1. Baseline characteristics of the study population

| Characteristics                               | Active CD<br>(n=93)      | Inactive CD<br>(n=69)   | P value |
|-----------------------------------------------|--------------------------|-------------------------|---------|
| Age                                           | 31±12                    | 35±15                   | 0.096   |
| Sex(female)                                   | 36(38.7%)                | 31(44.9%)               | 0.427   |
| Body Mass Index                               | 19.5±3.9                 | 20.8±4.3                | 0.049   |
| Employment status                             | -                        | -                       |         |
| no                                            | 27 (29.0%)               | 21 (30.5%)              | 0.961   |
| retired                                       | 6 (6.5%)                 | 3 (4.3%)                |         |
| yes                                           | 60 (64.5%)               | 45 (65.2%)              |         |
| Living status                                 | -                        | -                       |         |
| alone                                         | 3 (3.2%)                 | 6 (8.7%)                | 0.248   |
| with others                                   | 90 (96.8%)               | 63 (91.3%)              |         |
| Education                                     | -                        | -                       |         |
| up to 6 years                                 | 5 (5.4%)                 | 4 (5.8%)                | 0.705   |
| up to 9 years                                 | 28 (30.1%)               | 18 (26.1%)              |         |
| up to 12 years                                | 44 (47.3%)               | 34 (49.3%)              |         |
| college                                       | 16 (17.2%)               | 13 (18.8%)              |         |
| Marital status                                | -                        | -                       |         |
| married/cohabitating                          | 53 (57.0%)               | 34 (49.3%)              | 0.579   |
| widowed/divorced                              | 7 (7.5%)                 | 5 (7.2%)                |         |
| single                                        | 33 (35.5%)               | 30 (43.5%)              |         |
| Montreal location                             | -                        | -                       |         |
| Ileal (L1)                                    | 35 (37.6%)               | 28 (40.7%)              | 0.808   |
| Colonic (L2)                                  | 15 (16.2%)               | 5 (7.2%)                |         |
| Ileocolon (L3)                                | 39 (41.9%)               | 33 (47.8%)              |         |
| upper gastrointestinal tract (L4)             | 1 (1.1%)                 | 0 (0%)                  |         |
| L4+L1/L2/L3                                   | 3 (3.2%)                 | 3 (4.3%)                |         |
| Montreal behavior                             | -                        | -                       |         |
| inflammatory                                  | 52 (55.9%)               | 45 (65.2%)              | 0.401   |
| structuring                                   | 24 (25.8%)               | 16 (23.2%)              |         |
| penetrating                                   | 17 (18.3%)               | 8 (11.6%)               |         |
| Perianal disease                              | 35 (37.6%)               | 28 (40.6%)              | 0.704   |
| Current therapy                               | -                        | -                       |         |
| no treatment                                  | 0 (0%)                   | 2 (2.9%)                | 0.169   |
| corticosteroids                               | 8 (8.6%)                 | 7 (10.1%)               |         |
| 5-aminosalicylates                            | 21 (22.6%)               | 17 (24.6%)              |         |
| immunomodulators                              | 27 (29.0%)               | 22 (31.9%)              |         |
| antitumor necrosis factor<br>combined therapy | 16 (17.2%)<br>21 (22.6%) | 9 (13.0%)<br>12 (17.5%) |         |
| Anemia                                        | -                        | -                       |         |
| no                                            | 36 (38.7%)               | 55 (79.7%)              | <0.001  |
| mild                                          | 49 (52.7%)               | 10 (14.5%)              |         |
| moderate                                      | 6 (6.5%)                 | 3 (4.3%)                |         |
| severe                                        | 2 (2.1%)                 | 1 (1.5%)                |         |
| Relapses in the last year                     | -                        | -                       |         |
| 0                                             | 13 (14.0%)               | 35 (50.7%)              | <0.001  |
| 1-2                                           | 57 (61.3%)               | 24 (34.8%)              |         |
| 3                                             | 8 (8.6%)                 | 8 (11.6%)               |         |
| ≥4                                            | 15 (16.1%)               | 2 (2.9%)                |         |
| Disease duration (months)                     | 13±25                    | 11±19                   | 0.594   |
| C-reactive protein                            | 24.3±34.4                | 8.8±18.8                | 0.001   |

Note: Data are presented as the number (%) or mean±standard deviation.

Table 2. Questionnaire survey in for Crohn's disease patients

| Variable                  | Active CD | Inactive CD | P value | Men      | Women     | P value |
|---------------------------|-----------|-------------|---------|----------|-----------|---------|
| <b>SCL-90</b>             |           |             |         |          |           |         |
| Somatization              | 18.8±5.9  | 16.3±4.7    | 0.004   | 17.2±5.0 | 19.5±6.4  | 0.030   |
| Obsessive-compulsive      | 19.0±5.4  | 15.4±4.4    | <0.0001 | 17.2±5.0 | 18.1±5.9  | 0.345   |
| Interpersonal sensitivity | 15.4±5.8  | 12.1±4.0    | <0.0001 | 13.9±5.1 | 14.1±6.2  | 0.811   |
| Depression                | 24.7±9.1  | 18.3±5.2    | <0.0001 | 21.2±7.4 | 24.0±10.0 | 0.089   |
| Anxiety                   | 16.2±5.3  | 12.4±3.2    | <0.0001 | 14.2±4.4 | 15.8±5.6  | 0.050   |
| Hostility                 | 10.3±3.8  | 8.8±3.6     | 0.012   | 9.6±3.6  | 9.5±4.3   | 0.932   |
| Phobic anxiety            | 9.7±3.3   | 8.2±2.0     | 0.001   | 8.8±2.6  | 9.7±3.6   | 0.124   |
| paranoid                  | 8.9±3.2   | 7.3±2.3     | <0.0001 | 8.1±2.8  | 8.5±3.4   | 0.515   |
| psychoticism              | 14.9±4.3  | 12.3±3.6    | <0.0001 | 13.7±4.1 | 13.9±4.3  | 0.734   |
| Other                     | 12.6±3.9  | 9.9±2.5     | <0.0001 | 11.4±3.4 | 11.7±4.3  | 0.614   |
| <b>SSRS</b>               |           |             |         |          |           |         |
| objective support         | 8.8±2.8   | 9.3±2.4     | 0.239   | 8.9±2.7  | 9.1±2.6   | 0.641   |
| Subjective Support        | 15.1±5.6  | 18.0±6.2    | 0.003   | 16.4±5.7 | 16.1±6.6  | 0.757   |
| availability              | 6.9±1.7   | 7.4±1.7     | 0.080   | 7.0±1.7  | 7.3±1.7   | 0.471   |

Note: Data are presented as the mean±standard deviation.

Table 3. Results of the analysis of binary logistic regression analysis on disease activity

| The factors               | Hosmer and Lemeshow Test | S.E.  | Wald   | Beta  | 95% CI      | P value |
|---------------------------|--------------------------|-------|--------|-------|-------------|---------|
| <b>Univariate</b>         |                          |       |        |       |             |         |
| age                       | 0.466                    | 0.012 | 2.727  | 0.980 | 0.957-1.004 | 0.099   |
| Body Mass Index           | 0.155                    | 0.040 | 3.760  | 0.925 | 0.855-1.001 | 0.053   |
| Disease duration          | 0.494                    | 0.007 | 0.284  | 1.004 | 0.990-1.018 | 0.594   |
| C-reactive protein        | 0.000                    | 0.011 | 11.378 | 1.039 | 1.016-1.062 | 0.001   |
| objective support         | 0.434                    | 0.061 | 1.389  | 0.931 | 0.827-1.049 | 0.239   |
| Subjective Support        | 0.339                    | 0.028 | 8.551  | 0.921 | 0.872-0.973 | 0.003   |
| availability              | 0.504                    | 0.095 | 3.017  | 0.849 | 0.705-1.021 | 0.082   |
| Somatization              | 0.090                    | 0.034 | 7.296  | 1.096 | 1.025-1.171 | 0.007   |
| Obsessive compulsive      | 0.163                    | 0.037 | 16.349 | 1.161 | 1.080-1.248 | <0.001  |
| Interpersonal sensitivity | 0.130                    | 0.038 | 13.650 | 1.153 | 1.069-1.243 | <0.001  |
| Depression                | 0.785                    | 0.032 | 19.579 | 1.154 | 1.083-1.230 | <0.001  |
| Anxiety                   | 0.039                    | 0.058 | 20.748 | 1.301 | 1.162-1.456 | 0.039   |
| Hostility                 | 0.056                    | 0.049 | 5.876  | 1.126 | 1.023-1.240 | 0.015   |
| Phobic anxiety            | 0.601                    | 0.079 | 9.578  | 1.275 | 1.093-1.488 | 0.002   |
| Paranoid                  | 0.212                    | 0.081 | 10.490 | 1.300 | 1.109-1.523 | 0.001   |
| Psychoticism              | 0.029                    | 0.055 | 13.645 | 1.224 | 1.099-1.362 | <0.001  |
| Other                     | 0.382                    | 0.061 | 18.473 | 1.301 | 1.154-1.467 | <0.001  |
| <b>Multivariate</b>       |                          |       |        |       |             |         |
| Subjective Support        |                          | 0.041 | 6.216  | 0.903 | 0.834-0.979 | 0.013   |
| C-reactive protein        | 0.519                    | 0.012 | 10.486 | 1.038 | 1.105-1.062 | 0.001   |
| Anxiety                   |                          | 0.138 | 7.009  | 1.443 | 1.100-1.893 | 0.008   |
| Other                     |                          | 0.103 | 4.155  | 1.235 | 1.008-1.512 | 0.042   |

Note: SE: standardized error, Durbin-Watson:1.980.

## References :

1. Torres J, Mehandru S, Colombel JF, and Peyrin-Biroulet L. Crohn's disease. *Lancet*. 2017;389(10080):1741-55.
2. Yang H, Li Y, Wu W, Sun Q, Zhang Y, Zhao W, Lv H, Xia Q, Hu P, Li H, and Qian J. The incidence of inflammatory bowel disease in Northern China: a prospective population-based study. *PLoS One*. 2014;9(7):e101296.
3. Ng SC, Shi HY, Hamidi N, Underwood FE, Tang W, Benchimol EI, Panaccione R, Ghosh S, Wu JCY, Chan FKL, Sung JY, and Kaplan GG. Worldwide incidence and prevalence of inflammatory bowel disease in the 21st century: a systematic review of population-based studies. *Lancet*. 2017;390(10114):2769-78.
4. van den Brink G, Stapersma L, Vlug LE, Rizopolous D, Bodelier AG, van Wering H, Hurkmans P, Stuyt RJJ, Hendriks DM, van der Burg JAT, Utens E, and Escher JC. Clinical disease activity is associated with anxiety and depressive symptoms in adolescents and young adults with inflammatory bowel disease. *Aliment Pharmacol Ther*. 2018;48(3):358-69.
5. Xiong Q, Tang F, Li Y, Xie F, Yuan L, Yao C, Wu R, Wang J, Wang Q, and Feng P. Association of inflammatory bowel disease with suicidal ideation, suicide attempts, and suicide: A systematic review and meta-analysis. *J Psychosom Res*. 2022;160:110983.
6. Neuendorf R, Harding A, Stello N, Hanes D, and Wahbeh H. Depression and anxiety in patients with Inflammatory Bowel Disease: A systematic review. *J Psychosom Res*. 2016;87:70-80.
7. Barberio B, Zamani M, Black CJ, Savarino EV, and Ford AC. Prevalence of symptoms of anxiety and depression in patients with inflammatory bowel disease: a systematic review and meta-analysis. *Lancet Gastroenterol Hepatol*. 2021;6(5):359-70.
8. Xu J, Chen X, Ma K, Nie K, Luo W, Wu X, Pan S, and Wang X. Correlation Between Sleep, Life, Mood, and Diet and Severity of Inflammatory Bowel Disease in China: A Retrospective Study. *Med Sci Monit*. 2021;27:e930511.
9. Mittermaier C, Dejaco C, Waldhoer T, Oefflerbauer-Ernst A, Miehsler W, Beier M, Tillinger W, Gangl A, and Moser G. Impact of depressive mood on relapse in patients with inflammatory bowel disease: a prospective 18-month follow-up study. *Psychosom Med*. 2004;66(1):79-84.
10. Katz L, Tripp DA, Ropeleski M, Depew W, Curtis Nickel J, Vanner S, and Beyak MJ. Mechanisms of Quality of Life and Social Support in Inflammatory Bowel Disease. *J Clin Psychol Med Settings*. 2016;23(1):88-98.
11. Maaser C, Sturm A, Vavricka SR, Kucharzik T, Fiorino G, Annese V, Calabrese E, Baumgart DC, Bettenworth D, Borralho Nunes P, Burisch J, Castiglione F, Eliakim R, Ellul P, González-Lama Y, Gordon H, Halligan S, Katsanos K, Kopylov U, Kotze PG, Krustinš E, Laghi A, Limdi JK, Rieder F, Rimola J, Taylor SA, Tolan D, van Rhee P, Verstockt B, and Stoker J. ECCO-ESGAR Guideline for Diagnostic Assessment in IBD Part 1: Initial diagnosis, monitoring of known IBD, detection of complications. *J Crohns Colitis*. 2019;13(2):144-64.
12. Best WR, Beckett JM, and Singleton JW. Rederived values of the eight coefficients of the Crohn's Disease Activity Index (CDAI). *Gastroenterology*. 1979;77(4 Pt 2):843-6.
13. Fu H, Kaminga AC, Peng Y, Feng T, Wang T, Wu X, and Yang T. Associations between disease activity, social support and health-related quality of life in patients with inflammatory bowel diseases: the mediating role of psychological symptoms. *BMC Gastroenterol*. 2020;20(1):11.
14. Liu W, Wang J, Lyu S, Bai X, Chen X, and Li J. Effects of psychological stress and social support on quality of life of patients with ulcerative colitis. *Chinese Journal of Digestion*. 2018;38(9):613-17.
15. Schmitz N, Hartkamp N, Kiuse J, Franke GH, Reister G, and Tress W. The Symptom Check-List-90-R (SCL-90-R): a German validation study. *Qual Life Res*. 2000;9(2):185-93.



16. Schauenburg H, and Strack M. [The Symptom Checklist-90-R (SCL-90-R) for presenting statistically and clinically significant psychotherapy outcome]. *Psychother Psychosom Med Psychol.* 1998;48(7):257-64.
17. Mikocka-Walus A, Pittet V, Rossel JB, and von Känel R. Symptoms of Depression and Anxiety Are Independently Associated With Clinical Recurrence of Inflammatory Bowel Disease. *Clin Gastroenterol Hepatol.* 2016;14(6):829-35.e1.
18. Shang X, Li L, Niu C, Liao Y, and Gao S. Relationship between social support and parenting sense of competence in puerperal women: Multiple mediators of resilience and postpartum depression. *Front Psychiatry.* 2022;13:986797.
19. Dai W, Zeng Y, Liang E, Zhou Q, Zhang L, and Peng J. The actuality of resilience, social support and quality of life among patients with inflammatory bowel disease in China. *Nurs Open.* 2022;9(4):2190-98.
20. Sitnikova K, Dijkstra-Kersten SMA, Mokkink LB, Terluin B, van Marwijk HWJ, Leone SS, van der Horst HE, and van der Wouden JC. Systematic review of measurement properties of questionnaires measuring somatization in primary care patients. *J Psychosom Res.* 2017;103:42-62.
21. Regev S, Odes S, Slonim-Nevo V, Friger M, Schwartz D, Sergienko R, Eliakim R, and Sarid O. Differential relationships of somatization, depression, and anxiety to severity of Crohn's disease. *J Health Psychol.* 2021;26(13):2390-401.
22. Goldring AB, Taylor SE, Kemeny ME, and Anton PA. Impact of health beliefs, quality of life, and the physician-patient relationship on the treatment intentions of inflammatory bowel disease patients. *Health Psychol.* 2002;21(3):219-28.
23. Veilleux S, Noiseux I, Lachapelle N, Kohen R, Vachon L, Guay BW, Bitton A, and Rioux JD. Patients' perception of their involvement in shared treatment decision making: Key factors in the treatment of inflammatory bowel disease. *Patient Educ Couns.* 2018;101(2):331-39.
24. Goodhand JR, Wahed M, Mawdsley JE, Farmer AD, Aziz Q, and Rampton DS. Mood disorders in inflammatory bowel disease: relation to diagnosis, disease activity, perceived stress, and other factors. *Inflamm Bowel Dis.* 2012;18(12):2301-9.
25. Mules TC, Swaminathan A, Hirschfeld E, Borichevsky G, Frampton C, Day AS, and Geary RB. The impact of disease activity on psychological symptoms and quality of life in patients with inflammatory bowel disease-results from the Stress, Anxiety and Depression with Disease Activity (SADD) Study. *Aliment Pharmacol Ther.* 2022;55(2):201-11.
26. Peppas S, Pansieri C, Piovani D, Danese S, Peyrin-Biroulet L, Tsantes AG, Brunetta E, Tsantes AE, and Bonovas S. The Brain-Gut Axis: Psychological Functioning and Inflammatory Bowel Diseases. *J Clin Med.* 2021;10(3).
27. Feng L, Zhou N, Li Z, Fu D, Guo Y, Gao X, and Liu X. Co-occurrence of gut microbiota dysbiosis and bile acid metabolism alteration is associated with psychological disorders in Crohn's disease. *FASEB J.* 2022;36(1):e22100.
28. Freitas TH, Andreoulakis E, Alves GS, Miranda HL, Braga LL, Hyphantis T, and Carvalho AF. Associations of sense of coherence with psychological distress and quality of life in inflammatory bowel disease. *World J Gastroenterol.* 2015;21(21):6713-27.

STROBE Statement—Checklist of items that should be included in reports of *cross-sectional studies*

|                              | Item No | Recommendation                                                                                                                                                                                    |
|------------------------------|---------|---------------------------------------------------------------------------------------------------------------------------------------------------------------------------------------------------|
| <b>Title and abstract</b>    | 1       | (a) Indicate the study's design with a commonly used term in the title or the abstract                                                                                                            |
|                              | Yes     | (b) Provide in the abstract an informative and balanced summary of what was done and what was found                                                                                               |
| <b>Introduction</b>          |         |                                                                                                                                                                                                   |
| Background/rationale         | 2       | Explain the scientific background and rationale for the investigation being reported                                                                                                              |
|                              | Yes     |                                                                                                                                                                                                   |
| Objectives                   | 3       | State specific objectives, including any prespecified hypotheses                                                                                                                                  |
|                              | Yes     |                                                                                                                                                                                                   |
| <b>Methods</b>               |         |                                                                                                                                                                                                   |
| Study design                 | 4       | Present key elements of study design early in the paper                                                                                                                                           |
|                              | Yes     |                                                                                                                                                                                                   |
| Setting                      | 5       | Describe the setting, locations, and relevant dates, including periods of recruitment, exposure, follow-up, and data collection                                                                   |
|                              | Yes     |                                                                                                                                                                                                   |
| Participants                 | 6       | (a) Give the eligibility criteria, and the sources and methods of selection of participants                                                                                                       |
|                              | Yes     |                                                                                                                                                                                                   |
| Variables                    | 7       | Clearly define all outcomes, exposures, predictors, potential confounders, and effect modifiers. Give diagnostic criteria, if applicable                                                          |
|                              | Yes     |                                                                                                                                                                                                   |
| Data sources/<br>measurement | 8*      | For each variable of interest, give sources of data and details of methods of assessment (measurement). Describe comparability of assessment methods if there is more than one group              |
|                              | Yes     |                                                                                                                                                                                                   |
| Bias                         | 9       | Describe any efforts to address potential sources of bias                                                                                                                                         |
|                              | Yes     |                                                                                                                                                                                                   |
| Study size                   | 10      | Explain how the study size was arrived at                                                                                                                                                         |
|                              | Yes     |                                                                                                                                                                                                   |
| Quantitative variables       | 11      | Explain how quantitative variables were handled in the analyses. If applicable, describe which groupings were chosen and why                                                                      |
|                              | Yes     |                                                                                                                                                                                                   |
| Statistical methods          | 12      | (a) Describe all statistical methods, including those used to control for confounding                                                                                                             |
|                              | Yes     | (b) Describe any methods used to examine subgroups and interactions                                                                                                                               |
|                              |         | (c) Explain how missing data were addressed                                                                                                                                                       |
|                              |         | (d) If applicable, describe analytical methods taking account of sampling strategy                                                                                                                |
|                              |         | (e) Describe any sensitivity analyses                                                                                                                                                             |
| <b>Results</b>               |         |                                                                                                                                                                                                   |
| Participants                 | 13*     | (a) Report numbers of individuals at each stage of study—eg numbers potentially eligible, examined for eligibility, confirmed eligible, included in the study, completing follow-up, and analysed |
|                              | Yes     | (b) Give reasons for non-participation at each stage                                                                                                                                              |
|                              |         | (c) Consider use of a flow diagram                                                                                                                                                                |
| Descriptive data             | 14*     | (a) Give characteristics of study participants (eg demographic, clinical, social) and information on exposures and potential confounders                                                          |
|                              | Yes     | (b) Indicate number of participants with missing data for each variable of interest                                                                                                               |
| Outcome data                 | 15*     | Report numbers of outcome events or summary measures                                                                                                                                              |
|                              | Yes     |                                                                                                                                                                                                   |
| Main results                 | 16      | (a) Give unadjusted estimates and, if applicable, confounder-adjusted estimates and their precision (eg, 95% confidence interval). Make clear which confounders were                              |
|                              | Yes     |                                                                                                                                                                                                   |



|                          |           |                                                                                                                                                                            |
|--------------------------|-----------|----------------------------------------------------------------------------------------------------------------------------------------------------------------------------|
|                          |           | adjusted for and why they were included                                                                                                                                    |
|                          |           | (b) Report category boundaries when continuous variables were categorized                                                                                                  |
|                          |           | (c) If relevant, consider translating estimates of relative risk into absolute risk for a meaningful time period                                                           |
| Other analyses           | 17<br>Yes | Report other analyses done—eg analyses of subgroups and interactions, and sensitivity analyses                                                                             |
| <b>Discussion</b>        |           |                                                                                                                                                                            |
| Key results              | 18<br>Yes | Summarise key results with reference to study objectives                                                                                                                   |
| Limitations              | 19<br>Yes | Discuss limitations of the study, taking into account sources of potential bias or imprecision. Discuss both direction and magnitude of any potential bias                 |
| Interpretation           | 20<br>Yes | Give a cautious overall interpretation of results considering objectives, limitations, multiplicity of analyses, results from similar studies, and other relevant evidence |
| Generalisability         | 21<br>Yes | Discuss the generalisability (external validity) of the study results                                                                                                      |
| <b>Other information</b> |           |                                                                                                                                                                            |
| Funding                  | 22<br>Yes | Give the source of funding and the role of the funders for the present study and, if applicable, for the original study on which the present article is based              |

\*Give information separately for exposed and unexposed groups.

**Note:** An Explanation and Elaboration article discusses each checklist item and gives methodological background and published examples of transparent reporting. The STROBE checklist is best used in conjunction with this article (freely available on the Web sites of PLoS Medicine at <http://www.plosmedicine.org/>, Annals of Internal Medicine at <http://www.annals.org/>, and Epidemiology at <http://www.epidem.com/>). Information on the STROBE Initiative is available at [www.strobe-statement.org](http://www.strobe-statement.org).

# BMJ Open

## Association between disease activity and psychological change among Crohn's disease: a cross-sectional study

|                                 |                                                                                                                                                                                                                                                                                                                                                                                                                                                                                                                                                                                                                                                                                                                                                                                                                                                                                                                                                                                                                                                                                                                                                                                                                                                                                                                                                                                                                                                                                                                                                                                                                                                                                                                                                                                                                                                                                                                                                                                                                                                                                                                                                                                                                     |
|---------------------------------|---------------------------------------------------------------------------------------------------------------------------------------------------------------------------------------------------------------------------------------------------------------------------------------------------------------------------------------------------------------------------------------------------------------------------------------------------------------------------------------------------------------------------------------------------------------------------------------------------------------------------------------------------------------------------------------------------------------------------------------------------------------------------------------------------------------------------------------------------------------------------------------------------------------------------------------------------------------------------------------------------------------------------------------------------------------------------------------------------------------------------------------------------------------------------------------------------------------------------------------------------------------------------------------------------------------------------------------------------------------------------------------------------------------------------------------------------------------------------------------------------------------------------------------------------------------------------------------------------------------------------------------------------------------------------------------------------------------------------------------------------------------------------------------------------------------------------------------------------------------------------------------------------------------------------------------------------------------------------------------------------------------------------------------------------------------------------------------------------------------------------------------------------------------------------------------------------------------------|
| Journal:                        | <i>BMJ Open</i>                                                                                                                                                                                                                                                                                                                                                                                                                                                                                                                                                                                                                                                                                                                                                                                                                                                                                                                                                                                                                                                                                                                                                                                                                                                                                                                                                                                                                                                                                                                                                                                                                                                                                                                                                                                                                                                                                                                                                                                                                                                                                                                                                                                                     |
| Manuscript ID                   | bmjopen-2023-076219.R1                                                                                                                                                                                                                                                                                                                                                                                                                                                                                                                                                                                                                                                                                                                                                                                                                                                                                                                                                                                                                                                                                                                                                                                                                                                                                                                                                                                                                                                                                                                                                                                                                                                                                                                                                                                                                                                                                                                                                                                                                                                                                                                                                                                              |
| Article Type:                   | Original research                                                                                                                                                                                                                                                                                                                                                                                                                                                                                                                                                                                                                                                                                                                                                                                                                                                                                                                                                                                                                                                                                                                                                                                                                                                                                                                                                                                                                                                                                                                                                                                                                                                                                                                                                                                                                                                                                                                                                                                                                                                                                                                                                                                                   |
| Date Submitted by the Author:   | 24-Aug-2023                                                                                                                                                                                                                                                                                                                                                                                                                                                                                                                                                                                                                                                                                                                                                                                                                                                                                                                                                                                                                                                                                                                                                                                                                                                                                                                                                                                                                                                                                                                                                                                                                                                                                                                                                                                                                                                                                                                                                                                                                                                                                                                                                                                                         |
| Complete List of Authors:       | <p>Huang, mengting; Huazhong University of Science and Technology, Department of Radiology, Union Hospital, Tongji Medical College, Huazhong University of Science and Technology</p> <p>Tu, Lei; Huazhong University of Science and Technology, Division of Gastroenterology, Union Hospital, Tongji Medical College, Huazhong University of Science and Technology</p> <p>Wu, Linxia; Huazhong University of Science and Technology, Department of Radiology, Union Hospital, Tongji Medical College, Huazhong University of Science and Technology</p> <p>Zou, Yan; Huazhong University of Science and Technology, Department of Radiology, Union Hospital, Tongji Medical College, Huazhong University of Science and Technology</p> <p>Li, Xin; Huazhong University of Science and Technology, Department of Radiology, Union Hospital, Tongji Medical College, Huazhong University of Science and Technology</p> <p>Yue, Xiaofei; Huazhong University of Science and Technology, Department of Radiology, Union Hospital, Tongji Medical College, Huazhong University of Science and Technology</p> <p>Huang, Chen; Huazhong University of Science and Technology, Department of Radiology, Union Hospital, Tongji Medical College, Huazhong University of Science and Technology</p> <p>Lei, Ping; Huazhong University of Science and Technology, Department of Radiology, Union Hospital, Tongji Medical College, Huazhong University of Science and Technology</p> <p>Li, Qian; Huazhong University of Science and Technology, Department of Radiology, Union Hospital, Tongji Medical College, Huazhong University of Science and Technology</p> <p>Han, Ping; Huazhong University of Science and Technology, Department of Radiology, Union Hospital, Tongji Medical College, Huazhong University of Science and Technology</p> <p>Yang, Lian; Huazhong University of Science and Technology, Department of Radiology, Union Hospital, Tongji Medical College, Huazhong University of Science and Technology</p> <p>Zhu, Liangru; Huazhong University of Science and Technology, Division of Gastroenterology, Union Hospital, Tongji Medical College, Huazhong University of Science and Technology</p> |
| <b>Primary Subject Heading</b>: | Gastroenterology and hepatology                                                                                                                                                                                                                                                                                                                                                                                                                                                                                                                                                                                                                                                                                                                                                                                                                                                                                                                                                                                                                                                                                                                                                                                                                                                                                                                                                                                                                                                                                                                                                                                                                                                                                                                                                                                                                                                                                                                                                                                                                                                                                                                                                                                     |
| Secondary Subject Heading:      | Mental health                                                                                                                                                                                                                                                                                                                                                                                                                                                                                                                                                                                                                                                                                                                                                                                                                                                                                                                                                                                                                                                                                                                                                                                                                                                                                                                                                                                                                                                                                                                                                                                                                                                                                                                                                                                                                                                                                                                                                                                                                                                                                                                                                                                                       |

1  
2  
3  
4  
5  
6  
7  
8  
9  
10  
11  
12  
13  
14  
15  
16  
17  
18  
19  
20  
21  
22  
23  
24  
25  
26  
27  
28  
29  
30  
31  
32  
33  
34  
35  
36  
37  
38  
39  
40  
41  
42  
43  
44  
45  
46  
47  
48  
49  
50  
51  
52  
53  
54  
55  
56  
57  
58  
59  
60

|           |                                                                                                  |
|-----------|--------------------------------------------------------------------------------------------------|
| Keywords: | Coeliac disease < GASTROENTEROLOGY, Inflammatory bowel disease < GASTROENTEROLOGY, MENTAL HEALTH |
|           |                                                                                                  |

SCHOLARONE™  
Manuscripts



I, the Submitting Author has the right to grant and does grant on behalf of all authors of the Work (as defined in the below author licence), an exclusive licence and/or a non-exclusive licence for contributions from authors who are: i) UK Crown employees; ii) where BMJ has agreed a CC-BY licence shall apply, and/or iii) in accordance with the terms applicable for US Federal Government officers or employees acting as part of their official duties; on a worldwide, perpetual, irrevocable, royalty-free basis to BMJ Publishing Group Ltd ("BMJ") its licensees and where the relevant Journal is co-owned by BMJ to the co-owners of the Journal, to publish the Work in this journal and any other BMJ products and to exploit all rights, as set out in our [licence](#).

The Submitting Author accepts and understands that any supply made under these terms is made by BMJ to the Submitting Author unless you are acting as an employee on behalf of your employer or a postgraduate student of an affiliated institution which is paying any applicable article publishing charge ("APC") for Open Access articles. Where the Submitting Author wishes to make the Work available on an Open Access basis (and intends to pay the relevant APC), the terms of reuse of such Open Access shall be governed by a Creative Commons licence – details of these licences and which [Creative Commons](#) licence will apply to this Work are set out in our licence referred to above.

Other than as permitted in any relevant BMJ Author's Self Archiving Policies, I confirm this Work has not been accepted for publication elsewhere, is not being considered for publication elsewhere and does not duplicate material already published. I confirm all authors consent to publication of this Work and authorise the granting of this licence.

## Association between disease activity and psychological change among Crohn's disease: a cross-sectional study

Mengting Huang<sup>1,2\*</sup>, Lei Tu<sup>3\*</sup>, Linxia Wu<sup>1,2</sup>, Yan Zou<sup>1,2</sup>, Xin Li<sup>1,2</sup>, Xiaofei Yue<sup>1,2</sup>, Chen Huang<sup>1,2</sup>, Ping Lei<sup>1,2</sup>, Qian Li<sup>1,2</sup>, Ping Han<sup>1,2</sup>, Lian Yang<sup>1,2#</sup>, Liangru Zhu<sup>3#</sup>

<sup>1</sup> Department of Radiology, Union Hospital, Tongji Medical College, Huazhong University of Science and Technology, Wuhan, 430022, China

<sup>2</sup> Hubei Province Key Laboratory of Molecular Imaging, Wuhan, 430022, China

<sup>3</sup> Division of Gastroenterology, Union Hospital, Tongji Medical College, Huazhong University of Science and Technology, Wuhan, China

\*Corresponding author:

Liangru Zhu, Ph.D

E-mail: zhuliangru@hust.edu.cn

Institutional affiliations: 1. Division of Gastroenterology, Union Hospital, Tongji Medical College, Huazhong University of Science and Technology, Wuhan, China

\*Co-Corresponding author:

Lian Yang, PhD

Email: yanglian@hust.edu.cn

Institutional affiliations: 1. Department of Radiology, Union Hospital, Tongji Medical College, Huazhong University of Science and Technology, Wuhan, 430022, China; 2. Hubei Province Key Laboratory of Molecular Imaging, Wuhan, 430022, China.

### Abstract

**Objective:** To assess the relative of social support and psychological distress in disease activity among Crohn's disease (CD) patients.

**Design:** Cross-sectional study.

**Setting:** The study was conducted in Wuhan, China between March 2020 and March 2022.

**Participants:** A total of 184 patients with CD at Union Hospital, Tongji Medical College, Huazhong University of Science and Technology were enrolled in this study; of these, 162 patients were included in the final analysis.

**Results:** A total of 162 CD patients (active 93, inactive 69) were enrolled. Compared with the inactive CD group, the active CD group had higher CRP ( $P=0.001$ ), anemia ( $P<0.001$ ), and relapse rates in the last year ( $P<0.001$ ). Independent samples t-tests indicated that the active CD group reported lower SSRS scores and higher SCL-90 scores than the inactive CD group. Moreover, men with CD had lower somatization ( $P=0.030$ ) and anxiety ( $P=0.050$ ) scores than women. In binary logistic regression models, the subjective support (Beta=0.903,  $P=0.013$ ), the clinical factors of C-reactive protein (Beta=1.038,  $P=0.001$ ), and psychological distress factors of anxiety (Beta=1.443,  $P=0.008$ ) and other (Beta=1.235,  $P=0.042$ ) were disease activity predictors.

**Conclusion:** The findings highlight the importance of the psychological distress and social support factors that may play a role in CD patients' health. Interventions to address these issues should be part of management in CD.

**STRENGTHS AND LIMITATIONS OF THIS STUDY:**

Our study improved the understanding of the differences in psychological distress and social support among CD patients at different active stages in developing countries, especially in central China to provide evidence for subsequent research attempts to establish an association between social support and psychological well-being and disease activity.

In this study, gender differences were considered in the analysis.

However, this cross-sectional study could not address the causality between disease activity and psychological change factors of patients with CD.

**Keywords:** Crohn's disease, social support, psychological distress, anxiety

## Introduction

Crohn's disease (CD) is a chronic, nonspecific intestinal inflammatory disease characterized by recurrent abdominal pain and diarrhea that peaks in young adulthood(1). In addition to gastrointestinal manifestations, CD patients experience other systemic manifestations and complications. As of 2017, inflammatory bowel disease (IBD) affected 6.8 million people worldwide. The United States reported the highest incidence of IBD, followed by the United Kingdom(2). Epidemiological studies have shown that the incidence of IBD in China is 3.44 cases per one million people, which is the highest in Asia, and the incidence of IBD in mainland China is higher in the south and lower in the north(3). In recent years, the incidence of CD has increased rapidly in China(4, 5).

Due to bowel damage and a long medical history, patients have a high prevalence of psychological impairment, such as anxiety and depression, compared to the general population(6, 7). Although medical treatments are effective in controlling gastrointestinal inflammation, the relapsing behavior of CD can cause psychological disorders. Moreover, CD patients typically require lifelong medication, which seriously affects their quality of life and increases psychological distress. The CD is associated with high medical costs, high rates of psychological disorders, and illness burdens associated with reduced productivity and activity. Studies have shown that approximately 20% of inflammatory bowel disease patients may have symptoms of anxiety, and approximately 15% have symptoms of depression(8, 9). Large population studies showed that the prevalence of psychological distress and injury in IBD patients was significantly higher than that in non-IBD adults(10, 11). And regarding the relationship between the psychological state of IBD patients and gender differences, studies have pointed out that female IBD patients are more prone to anxiety, depression, and other psychological problems than male patients(9). For example, the prevalence of comorbidity anxiety and depression in female IBD patients was 33.8% and 21.2%, respectively, compared with 22.8% and 16.2% in male IBD patients(12).

The uncertainty of treatment results and psychological disorders may lead to disease recurrence, aggravate the course of the disease, and directly lead to the decline of patients' quality of life and the increase of treatment costs(13, 14). Patients with IBD and anxiety or depression have a higher risk of hospitalization, emergency room visits, readmissions, and use of outpatient services than patients without these symptoms(15). Thus, healthcare services for CD are more demanding and costly for patients with symptoms of anxiety and depression. Xu et al. reported that poor sleep quality, anxiety, and depression were related to having active IBD(16). In addition, disease activity was found to be associated with depression and anxiety, and psychological distress may increase the likelihood of disease relapse(17). However, most previous studies have focused on anxiety or depression, rarely focusing on other dimensions. Social support might be another dimension that plays a role in disease severity. Interestingly, there are few studies on the association between social support and disease activity in CD patients(18, 19).

This study aimed to improve the understanding of the differences in psychological distress and social support among CD patients at different active stages in China to provide evidence for subsequent research attempts to establish an association between social support and psychological well-being and disease activity. In addition, we considered whether sex moderates the relationship between disease activity and social support and psychological distress in CD. Previous studies of IBD patients have found that older patients have higher symptoms of anxiety and depression. Therefore, in this study, age was used as a control variable. Thus, we proposed the following hypotheses: there were significant differences in psychological disorders and social support between active and inactive CD patients, and there may be gender differences as well.

## Methods

### Patient and Public Involvement

1  
2  
3 Patients or the public were not involved in the design, or conduct, or reporting, or dissemination plans of this  
4 research.

### 5 **Ethical aspects**

7 This study was approved by the institutional ethics committee of Tongji Medical College of Huazhong University  
8 of Science and Technology, and consent was acquired from all participants. All participants were informed of the  
9 purpose and methods of this study and provided written informed consent.

### 11 **Participants**

12 This study was a cross-sectional, single-center study. Participants were recruited between March 2020 and  
13 March 2022 at Union Hospital, Tongji Medical College, Huazhong University of Science and Technology in China.  
14 The inclusion criteria were patients with a diagnosis of CD(20), adult patients (aged 18 years or more), patients with  
15 sufficient ability in spoken and written Chinese to complete all the questionnaires, patients without a diagnosis of  
16 concomitant mental disorders or dementia and patients not taking psychotropic medication for CD. The exclusion  
17 criteria were as follows: (1) patients who could not complete the questionnaires; (2) patients who had tumors or other  
18 medical comorbidities; and (3) patients who were pregnant. The flow diagram of the enrolled patients and healthy  
19 controls is shown in Figure 1.

### 24 **Data collection**

25 Clinical and demographic data were collected, including age, sex, body mass index, employment status, living  
26 status, educational status, marital status, and disease duration. The severity of CD was assessed using Crohn's  
27 disease activity index (CDAI) scores(21). A CDAI score of less than 150 was defined as disease inactivity. A CDAI  
28 score of 150 or more was defined as disease activity.

30 Social support was assessed using the Social Support Rating Scale (SSRS)(22, 23). The participants' social  
31 support was evaluated by the Chinese version of the SSRS, which was previously demonstrated to have reliability  
32 and validity. It can measure the characteristics of social support and its relationship with participants' mental health  
33 levels, mental illness, and various physical diseases. The scale has 10 items, including items regarding objective  
34 support (3 items), subjective support (4 items), and the utilization of social support (3 items). The total score ranges  
35 from 11-59 and is acquired by adding the scores of each item. Lower scores on indices of the SSRS indicate less  
36 social support.

39 The psychological state was assessed using the Symptom Checklist-90 (SCL-90)(24, 25). The scale has a total  
40 of 90 items regarding a wide range of psychiatric symptoms, including feelings, emotions, thinking, consciousness,  
41 behaviors, habits, interpersonal relationships, diet, and sleep. Ten factors are used to reflect 10 aspects of  
42 psychological symptoms, including psychoticism, paranoid ideation, phobic anxiety, hostility, anxiety, depression,  
43 interpersonal sensitivity, obsessive-compulsive behaviors, and somatization. The statistical standard of the SCL-90  
44 mainly consists of two items: the total score and the various factor scores. The total score is the sum of the scores of  
45 the 90 items, which reflects the severity of the disease. The factor score is the average score of all factors, which  
46 ranges from "0" ("no problem") to "4" ("very serious"). Each factor reflects a certain aspect of the participant's  
47 symptoms, so the symptom distribution characteristics of the participants can be understood through the factor score.  
48 According to the results of the Chinese norm, if the total score exceeds 160 points, the positive items exceed 43  
49 points, or any factor score exceeds 2 points, the participants are considered to have a positive screening, and further  
50 examination is needed. This version has excellent internal consistency for all items.

### 56 **Statistical analysis**



1  
2  
3 All statistical analyses were performed in SPSS 26.0, GraphPad Prism 8.0, and Origin 2021 software. The  
4 independent sample T-test was used to determine the relationship between disease status and sex differences and  
5 scale factors. Correlation analysis was applied to evaluate the relationship among the clinical, psychological, and  
6 social support factors. Hierarchical multiple regression analysis (MRA) was used to examine the unique contribution  
7 of participant characteristics, psychological distress scores, and SSRS factor scores on the composite factors of  
8 disease status.  $P < 0.05$  was considered statistically significant.  
9  
10

## 11 **Results**

### 12 **Sample characteristics**

13 A total of 162 CD patients with complete survey responses were analyzed (active  $n=93$ , inactive  $n=69$ ).  
14 Participants in the disease-active group reported a disease course of 13 months, and those in the inactive group  
15 reported a disease course of 11 months. The Independent Sample T-test and Chi-Square Tests indicated no  
16 statistically significant difference in age, employment status, living status, marital status, or years of education  
17 between the two groups. Compared with the inactive CD group, the active CD group had higher CRP ( $P=0.001$ ) and  
18 ESR values ( $P<0.001$ ). In addition, these patients tended to have higher anemia rates and relapse rates in the last  
19 year ( $P<0.001$ ), which is shown in Table 1. Independent samples t-tests indicated differences between the two  
20 groups, with the active CD group reporting lower SSRS scores and higher SCL-90 scores than the inactive CD group,  
21 which is shown in Table 2. Moreover, women showed higher levels of anemia rate ( $P=0.021$ ), relapse rates in the last  
22 year ( $P=0.020$ ) and somatization ( $P=0.030$ ) and anxiety ( $P=0.050$ ) than men, as shown in Table 3 and  
23 Supplementary materials Table 1.  
24  
25  
26  
27  
28  
29

### 30 **Preliminary analyses**

31 Figure 2 shows the correlation between social support and the psychological distress scale. The results showed  
32 that objective support was negatively correlated with psychological distress (obsessive-compulsive, interpersonal  
33 sensitivity, anxiety, hostility, phobic anxiety, paranoid, psychoticism, and other factors) ( $P<0.05$ ). Subjective support  
34 was negatively correlated with psychological distress (somatization, obsessive-compulsive, interpersonal sensitivity,  
35 depression, anxiety, hostility, phobic anxiety, paranoid, psychoticism, and other) ( $P<0.05$ ). Availability was negatively  
36 correlated with psychological distress (somatization, obsessive-compulsive, interpersonal sensitivity, depression,  
37 anxiety, hostility, paranoid, psychoticism, and other factors) ( $P<0.05$ ).  
38  
39  
40  
41

### 42 **Binary logistic regression models**

43 Univariate analysis suggested that C-reactive protein levels ( $P=0.001$ ), somatization ( $P=0.007$ ), obsessive  
44 compulsiveness ( $P<0.001$ ), interpersonal sensitivity ( $P<0.001$ ), depression ( $P<0.001$ ), anxiety ( $P=0.039$ ), hostility  
45 ( $P=0.015$ ), phobic anxiety ( $P=0.002$ ), paranoid ( $P=0.001$ ), psychoticism ( $P<0.001$ ), other factors ( $P<0.001$ ) and  
46 subjective support ( $P=0.003$ ) were statistically significant and were included in the subsequent binary logistic  
47 regression analysis. Binary logistic regression analyses showed that the social support factors of subjective support  
48 (Beta=0.903,  $P=0.013$ ), the clinical factors of C-reactive protein levels (Beta=1.038,  $P=0.001$ ), the psychological  
49 distress factors of anxiety (Beta=1.443,  $P=0.008$ ) and other factors (Beta=1.235,  $P=0.042$ ) were predictors of disease  
50 activity, as shown in Table 4.  
51  
52  
53  
54

## 55 **Discussion**

1  
2  
3 In this study, we described clinical, social support, and psychological distress differences, and we also assessed  
4 the relationships between disease activity and dimensions of psychological distress and social support symptoms in a  
5 cohort of CD patients. As we previously hypothesized, our present results showed that active CD patients had higher  
6 SCL-90 and lower SSRS scores than inactive CD patients, and social support factors were related to psychological  
7 distress factors, both of which had an impact on disease activity. We also found that women showed higher levels of  
8 somatization and anxiety than men, but this was not observed for social support. Finally, we found that C-reactive  
9 protein, subjective support, anxiety, and other factors were relevant determinants of disease activity in CD patients.

12 Psychological factors such as anxiety and depression have been studied about CD (26), but the roles of other  
13 factors such as social support have been poorly investigated. The high correlations of social support factors with  
14 psychological distress symptoms in CD patients are consistent with a previous study about other illnesses (27) and  
15 indicate that the three factors of social support are likely a concept that reflects another dimension of psychological  
16 states. Social support is defined as behavioral or emotional support provided by family members, other people, or  
17 other groups.

20 Social support is a positive health resource that contributes to the well-being of people with chronic diseases.  
21 The ability of an actor to derive benefits from his or her membership in a social network or other social structure. This  
22 positive support helps individuals overcome difficulties and challenges in life, especially stress related to coping with  
23 chronic illness. This is consistent with a biobehavioral model in which patients' responses to illness and health are  
24 influenced by family and peer relationships. Social support can be divided into three categories: objective support,  
25 subjective support, and availability(3). However, in populations of patients with chronic disease, there are individual  
26 differences in the use of social support. Some people can receive support at any time but refuse the help of others. In  
27 addition, interpersonal support is a process of individual interaction. Past research has shown that social support has  
28 different effects on different diseases(28).

31 IBD is considered a bio-psychosocial disease characterized by psychological distress and psychological or  
32 psychiatric disorders such as depression or anxiety(29). Therefore, numerous previous studies have focused on  
33 anxiety or depression and quality of life. Recent studies have also looked at attachment and mentalizing dimensions.  
34 Based on evolutionary theory and behavioral science, attachment theory and research suggest that human infants  
35 are born with an evolutionarily pre-programmed psychobiological need to form social bonds with emotionally  
36 important caregivers to maximize protection and survival(30). As a result, they exhibit attachment behaviors  
37 characterized by seeking contact and comfort from one or more important caregivers when feelings of vulnerability  
38 arise. Thus, individuals with secure attachment styles may form positive relationships, experience confidence and a  
39 sense of self-worth, and have a realistic perception of others. Conversely, people with the anxious attachment type  
40 may have a sense of insecurity in their relationships, which they view as fragile and void.

44 Consistent with previous research, the depressive, anxiety, and somatization factors of patients with CD are  
45 different for different disease severities(31, 32). The three factors of social support are negatively correlated with  
46 psychological distress (somatization, anxiety, anxiety, and other factors). Somatization mainly reflects the subjective  
47 body discomfort of patients, including discomfort due to cardiovascular, gastrointestinal, respiratory, and other  
48 systems, as well as headaches, backaches, and muscle soreness. Interestingly, the relationship between disease  
49 severity and most psychological distress and social support factors in addition to anxiety and subjective support  
50 factors was no longer significant after including social support factors in the model.

53 In binary logistic regression models, we also found that subjective support factors, anxiety, other psychological  
54 distress factors, and C-reactive protein remained significant predictors of disease severity, which may be related to  
55 the fluctuating course of progression and remission that characterizes this disease. Namely, patients with CD attach  
56

1  
2  
3 particular importance to their subjective feelings and may be inclined to interpret any physical or subjective discomfort  
4 they experience as a sign of psychological distress, leading them to report lower levels of subjective support.  
5 However, these lower levels of subjective support result in worsening disease activity. This biopsychosocial  
6 explanation is consistent with what has been found in people with CD(33, 34).  
7

8 In our study, the psychological dimension data were obtained from the SCL-90. The results indicate that the  
9 psychological state of active CD patients is affected in some dimensions, compared with inactive CD patients. This is  
10 consistent with the results of Goodhand, J.R., et al. (35). Neither active nor inactive CD patients met the criteria for  
11 anxiety and depression in our study. In recent years, an increasing number of doctors have realized that  
12 psychological disorders are common in inflammatory bowel disease patients and may affect the disease condition  
13 and quality of life(22, 36). However, the etiology of psychological disorders appears to be multifactorial; for example,  
14 environmental factors may include stressful life events, disease activity, disease course, medications, income, or  
15 marital status(37, 38). Regarding clinical factors, the inflammatory performance of CD may play a role in disease  
16 activity and quality of life. Active CD patients had higher anemia rates, CRP values, ESR values, and relapse rates. It  
17 is possible to improve the psychological state and quality of life of patients with CD through early identification and  
18 intervention.  
19

20 In recent years, some scholars have also studied the gender difference of IBD. At present, many studies have  
21 found that the differences in the psychological performance of IBD patients are related to gender, and females are  
22 predictors of IBD combined anxiety and depression(39, 40). However, the study of Nahon et al. pointed out that the  
23 incidence of anxiety and depression in female patients with IBD was not significantly increased, and gender was not  
24 correlated with the occurrence of anxiety and depression(41). In this study, we also found that women with CD tend  
25 to report greater depressive symptoms than men, which was consistent with previous research (32, 42). At the same  
26 time, epidemiological studies have confirmed that there are significant gender differences in the incidence of  
27 inflammatory bowel disease (IBD), and this difference shows significant regional differences. In the United States(43),  
28 Canada(44, 45), Israel(46), Spain(47), and Denmark(48), the incidence of women is higher than that of men. In Asian  
29 countries such as South Korea(49), India(50), and China(51), the incidence is higher in men than in women. The  
30 results indicate that female CD patients are more prone to anxiety and depression, which was mainly reflected in  
31 three aspects. First, women have a higher rate of anemia symptoms and disease recurrence than men, which may be  
32 more prone to psychological problems due to illness and reduced quality of life. Secondly, women are less likely than  
33 men to use immunosuppressives and biological agents. Although there were no statistically significant differences in  
34 these clinical characteristics between genders of patients with CD, which may be due to the insufficient sample size  
35 included in this study. Third, women's psychological activities are more delicate, more concerned about their  
36 symptoms, and pregnant with the next generation of problems. Therefore, in daily clinical diagnosis and treatment,  
37 more attention should be paid to whether women have mental and psychological abnormalities and their severity, and  
38 effective health education and psychological support should be provided according to the specific circumstances.  
39

40 To our knowledge, this is the first study to compare the relationship between social support and disease activity  
41 across men and women with CD. The strengths of this study include the diversity of the sample in terms of social  
42 support and psychological distress scores, which allowed us to assess somatization in patients with different levels of  
43 disease activity.  
44

45 Several limitations should be considered in this study. First, this was a single-center study in which all  
46 participants were of Han nationality and from Hubei Province, China. Second, the cross-sectional nature of the data  
47 precludes us from concluding the causality of the relationships among social support, psychological distress, and  
48  
49  
50  
51

1  
2  
3 disease activity. In the future, longitudinal research should be conducted to establish a more robust connection  
4 between various clinical, psychological, and social support factors and disease activity in CD patients.  
5  
6

## 7 **Conclusions**

8 In conclusion, this study indicates the importance of considering a broader range of psychological distress and  
9 social support factors that may play a role in the health of patients with CD. Further exploration of these factors in  
10 longitudinal and intervention studies may help to develop effective CD management models.  
11  
12

13 **Contributors** M.T.H and L.T substantial contributions to the conception, design, acquisition, analysis, and  
14 interpretation of data for the work. They also draft the work or revise it critically for important intellectual content.  
15 L.X.W, Y.Z, X.L, X.F.Y, and C.H substantial contributions to the acquisition and interpretation of data for the work. P.L,  
16 Q.L, and P.H substantial contributions to revising it critically for important intellectual content. L.Y and L.R.Z  
17 substantial contributions to the conception, design, and agreement to be accountable for all aspects of the work in  
18 ensuring that questions related to the accuracy or integrity of any part of the work are appropriately investigated and  
19 resolved.  
20  
21

22 **Funding** This research were supported by Natural Science Foundation of Hubei Province(2021CFB450) and Wuhan  
23 Knowledge Innovation Special Basic Research Project (2022020801010462).  
24

25 **Disclaimer** The funding sources had no role in the study conduct, data collection, analyses, data interpretation, and  
26 the decision to submit the manuscript.  
27

28 **Competing interests** None declared.

29 **Patient consent for publication** All participants were informed of the purpose and methods of this study and  
30 provided written informed consent.  
31

32 **Ethics approval** This study was approved by the institutional ethics committee of Tongji Medical College of  
33 Huazhong University of Science and Technology.

34 **Conflict of Interest** The authors of this manuscript declare no relationships with any companies, whose products or  
35 services may be related to the subject matter of the article.  
36

## 37 **Statistics and Biometry:**

38 No complex statistical methods were necessary for this paper.

39 **Provide Data sharing** No additional data available  
40  
41  
42  
43  
44  
45  
46  
47  
48  
49  
50  
51  
52  
53  
54  
55  
56  
57  
58  
59  
60

1  
2  
3 Figure 1: Flow diagram of the enrolled patients.  
4  
5

6  
7 Figure 2. Analysis of the correlation of clinical data with social support and psychological factors.

8 Note: Som=somatization, OC=obsessive-compulsive, IS=interpersonal sensitivity, Dep=depression, Anx=anxiety,  
9 Hos=hostility, PA=phobic anxiety, Par=paranoid, Psy=psychoticism, Oth=other, OS=objective support, SS=subjective  
10 support, Ava=availability. \* P<=0.05; \*\* P<=0.01; \*\*\* P<=0.001.  
11  
12  
13  
14  
15  
16  
17  
18  
19  
20  
21  
22  
23  
24  
25  
26  
27  
28  
29  
30  
31  
32  
33  
34  
35  
36  
37  
38  
39  
40  
41  
42  
43  
44  
45  
46  
47  
48  
49  
50  
51  
52  
53  
54  
55  
56  
57  
58  
59  
60

For peer review only

Table 1. Baseline characteristics of the study population

| Characteristics                   | Active CD<br>(n=93) | Inactive CD<br>(n=69) | P value |
|-----------------------------------|---------------------|-----------------------|---------|
| Age                               | 31±12               | 35±15                 | 0.096   |
| Sex(female)                       | 36(38.7%)           | 31(44.9%)             | 0.427   |
| Body Mass Index                   | 19.5±3.9            | 20.8±4.3              | 0.049   |
| Employment status                 | -                   | -                     |         |
| no                                | 27 (29.0%)          | 21 (30.5%)            | 0.961   |
| retired                           | 6 (6.5%)            | 3 (4.3%)              |         |
| yes                               | 60 (64.5%)          | 45 (65.2%)            |         |
| Living status                     | -                   | -                     |         |
| alone                             | 3 (3.2%)            | 6 (8.7%)              | 0.248   |
| with others                       | 90 (96.8%)          | 63 (91.3%)            |         |
| Education                         | -                   | -                     |         |
| up to 6 years                     | 5 (5.4%)            | 4 (5.8%)              | 0.705   |
| up to 9 years                     | 28 (30.1%)          | 18 (26.1%)            |         |
| up to 12 years                    | 44 (47.3%)          | 34 (49.3%)            |         |
| college                           | 16 (17.2%)          | 13 (18.8%)            |         |
| Marital status                    | -                   | -                     |         |
| married/cohabitating              | 53 (57.0%)          | 34 (49.3%)            | 0.579   |
| widowed/divorced                  | 7 (7.5%)            | 5 (7.2%)              |         |
| single                            | 33 (35.5%)          | 30 (43.5%)            |         |
| Montreal location                 | -                   | -                     |         |
| Ileal (L1)                        | 35 (37.6%)          | 28 (40.7%)            | 0.808   |
| Colonic (L2)                      | 15 (16.2%)          | 5 (7.2%)              |         |
| Ileocolon (L3)                    | 39 (41.9%)          | 33 (47.8%)            |         |
| upper gastrointestinal tract (L4) | 1 (1.1%)            | 0 (0%)                |         |
| L4+L1/L2/L3                       | 3 (3.2%)            | 3 (4.3%)              |         |
| Montreal behavior                 | -                   | -                     |         |
| inflammatory                      | 52 (55.9%)          | 45 (65.2%)            | 0.401   |
| structuring                       | 24 (25.8%)          | 16 (23.2%)            |         |
| penetrating                       | 17 (18.3%)          | 8 (11.6%)             |         |
| Perianal disease                  | 35 (37.6%)          | 28 (40.6%)            | 0.704   |
| Current therapy                   | -                   | -                     |         |
| no treatment                      | 0 (0%)              | 2 (2.9%)              | 0.169   |
| corticosteroids                   | 8 (8.6%)            | 7 (10.1%)             |         |
| 5-aminosalicylates                | 21 (22.6%)          | 17 (24.6%)            |         |
| immunomodulators                  | 27 (29.0%)          | 22 (31.9%)            |         |
| antitumor necrosis factor         | 16 (17.2%)          | 9 (13.0%)             |         |
| combined therapy                  | 21 (22.6%)          | 12 (17.5%)            |         |
| Anemia                            | -                   | -                     |         |
| no                                | 36 (38.7%)          | 55 (79.7%)            | <0.001  |
| mild                              | 49 (52.7%)          | 10 (14.5%)            |         |
| moderate                          | 6 (6.5%)            | 3 (4.3%)              |         |
| severe                            | 2 (2.1%)            | 1 (1.5%)              |         |
| Relapses in the last year         | -                   | -                     |         |
| 0                                 | 13 (14.0%)          | 35 (50.7%)            | <0.001  |
| 1-2                               | 57 (61.3%)          | 24 (34.8%)            |         |
| 3                                 | 8 (8.6%)            | 8 (11.6%)             |         |
| ≥4                                | 15 (16.1%)          | 2 (2.9%)              |         |
| Disease duration (months)         | 13±25               | 11±19                 | 0.594   |
| C-reactive protein                | 24.3±34.4           | 8.8±18.8              | 0.001   |

Note: Data are presented as the number (%) or mean±standard deviation. CD=Crohn's disease

Table 2. Questionnaire survey in for Crohn's disease patients

| Variable                  | Active CD (n=93) | Inactive CD (n=69) | P value |
|---------------------------|------------------|--------------------|---------|
| SCL-90                    |                  |                    |         |
| Somatization              | 18.8±5.9         | 16.3±4.7           | 0.004   |
| Obsessive-compulsive      | 19.0±5.4         | 15.4±4.4           | <0.0001 |
| Interpersonal sensitivity | 15.4±5.8         | 12.1±4.0           | <0.0001 |
| Depression                | 24.7±9.1         | 18.3±5.2           | <0.0001 |
| Anxiety                   | 16.2±5.3         | 12.4±3.2           | <0.0001 |
| Hostility                 | 10.3±3.8         | 8.8±3.6            | 0.012   |
| Phobic anxiety            | 9.7±3.3          | 8.2±2.0            | 0.001   |
| paranoid                  | 8.9±3.2          | 7.3±2.3            | <0.0001 |
| psychoticism              | 14.9±4.3         | 12.3±3.6           | <0.0001 |
| Other                     | 12.6±3.9         | 9.9±2.5            | <0.0001 |
| SSRS                      |                  |                    |         |
| objective support         | 8.8±2.8          | 9.3±2.4            | 0.239   |
| Subjective Support        | 15.1±5.6         | 18.0±6.2           | 0.003   |
| availability              | 6.9±1.7          | 7.4±1.7            | 0.080   |

Note: Data are presented as the mean±standard deviation. CD=Crohn's disease; SCL-90=Check List-90; SSRS= Social Support Rating Scale.

Table 3. Differences in questionnaire survey results between men (n=95) and women (n=67).

| Variable                  | Men      | Women     | P value |
|---------------------------|----------|-----------|---------|
| SCL-90                    |          |           |         |
| Somatization              | 17.2±5.0 | 19.5±6.4  | 0.030   |
| Obsessive-compulsive      | 17.2±5.0 | 18.1±5.9  | 0.345   |
| Interpersonal sensitivity | 13.9±5.1 | 14.1±6.2  | 0.811   |
| Depression                | 21.2±7.4 | 24.0±10.0 | 0.089   |
| Anxiety                   | 14.2±4.4 | 15.8±5.6  | 0.050   |
| Hostility                 | 9.6±3.6  | 9.5±4.3   | 0.932   |
| Phobic anxiety            | 8.8±2.6  | 9.7±3.6   | 0.124   |
| paranoid                  | 8.1±2.8  | 8.5±3.4   | 0.515   |
| psychoticism              | 13.7±4.1 | 13.9±4.3  | 0.734   |
| Other                     | 11.4±3.4 | 11.7±4.3  | 0.614   |
| SSRS                      |          |           |         |
| objective support         | 8.9±2.7  | 9.1±2.6   | 0.641   |
| Subjective Support        | 16.4±5.7 | 16.1±6.6  | 0.757   |
| availability              | 7.0±1.7  | 7.3±1.7   | 0.471   |

Note: Data are presented as the mean±standard deviation. CD=Crohn's disease; SCL-90=Check List-90; SSRS= Social Support Rating Scale.



Table 4. Results of the analysis of binary logistic regression analysis on disease activity

| The factors                      | Hosmer and Lemeshow Test | S.E.  | Wald   | Beta  | 95% CI      | P value | Note: SE: standardized error, Durbin-Watson: 1.980. |
|----------------------------------|--------------------------|-------|--------|-------|-------------|---------|-----------------------------------------------------|
| <b>Univariate</b>                | -                        | -     | -      | -     | -           | -       |                                                     |
| age                              | 0.466                    | 0.012 | 2.727  | 0.980 | 0.957-1.004 | 0.099   |                                                     |
| Body Mass Index                  | 0.155                    | 0.040 | 3.760  | 0.925 | 0.855-1.001 | 0.053   |                                                     |
| Disease duration                 | 0.494                    | 0.007 | 0.284  | 1.004 | 0.990-1.018 | 0.594   |                                                     |
| <b>C-reactive protein</b>        | 0.000                    | 0.011 | 11.378 | 1.039 | 1.016-1.062 | 0.001   |                                                     |
| objective support                | 0.434                    | 0.061 | 1.389  | 0.931 | 0.827-1.049 | 0.239   |                                                     |
| <b>Subjective Support</b>        | 0.339                    | 0.028 | 8.551  | 0.921 | 0.872-0.973 | 0.003   |                                                     |
| availability                     | 0.504                    | 0.095 | 3.017  | 0.849 | 0.705-1.021 | 0.082   |                                                     |
| Somatization                     | 0.090                    | 0.034 | 7.296  | 1.096 | 1.025-1.171 | 0.007   |                                                     |
| <b>Obsessive compulsive</b>      | 0.163                    | 0.037 | 16.349 | 1.161 | 1.080-1.248 | <0.001  |                                                     |
| <b>Interpersonal sensitivity</b> | 0.130                    | 0.038 | 13.650 | 1.153 | 1.069-1.243 | <0.001  |                                                     |
| <b>Depression</b>                | 0.785                    | 0.032 | 19.579 | 1.154 | 1.083-1.230 | <0.001  |                                                     |
| <b>Anxiety</b>                   | 0.039                    | 0.058 | 20.748 | 1.301 | 1.162-1.456 | 0.039   |                                                     |
| <b>Hostility</b>                 | 0.056                    | 0.049 | 5.876  | 1.126 | 1.023-1.240 | 0.015   |                                                     |
| <b>Phobic anxiety</b>            | 0.601                    | 0.079 | 9.578  | 1.275 | 1.093-1.488 | 0.002   |                                                     |
| <b>Paranoid</b>                  | 0.212                    | 0.081 | 10.490 | 1.300 | 1.109-1.523 | 0.001   |                                                     |
| <b>Psychoticism</b>              | 0.029                    | 0.055 | 13.645 | 1.224 | 1.099-1.362 | <0.001  |                                                     |
| <b>Other</b>                     | 0.382                    | 0.061 | 18.473 | 1.301 | 1.154-1.467 | <0.001  |                                                     |
| <b>Multivariate</b>              | -                        | -     | -      | -     | -           | -       |                                                     |
| Subjective Support               |                          | 0.041 | 6.216  | 0.903 | 0.834-0.979 | 0.013   |                                                     |
| C-reactive protein               | 0.519                    | 0.012 | 10.486 | 1.038 | 1.105-1.062 | 0.001   |                                                     |
| Anxiety                          |                          | 0.138 | 7.009  | 1.443 | 1.100-1.893 | 0.008   |                                                     |
| Other                            |                          | 0.103 | 4.155  | 1.235 | 1.008-1.512 | 0.042   |                                                     |



## References :

1. Torres J, Mehandru S, Colombel JF, and Peyrin-Biroulet L. Crohn's disease. *Lancet*. 2017;389(10080):1741-55.
2. The global, regional, and national burden of inflammatory bowel disease in 195 countries and territories, 1990-2017: a systematic analysis for the Global Burden of Disease Study 2017. *Lancet Gastroenterol Hepatol*. 2020;5(1):17-30.
3. Dai W, Zeng Y, Liang E, Zhou Q, Zhang L, and Peng J. The actuality of resilience, social support and quality of life among patients with inflammatory bowel disease in China. *Nurs Open*. 2022;9(4):2190-98.
4. Yang H, Li Y, Wu W, Sun Q, Zhang Y, Zhao W, Lv H, Xia Q, Hu P, Li H, and Qian J. The incidence of inflammatory bowel disease in Northern China: a prospective population-based study. *PLoS One*. 2014;9(7):e101296.
5. Ng SC, Shi HY, Hamidi N, Underwood FE, Tang W, Benchimol EI, Panaccione R, Ghosh S, Wu JCY, Chan FKL, Sung JY, and Kaplan GG. Worldwide incidence and prevalence of inflammatory bowel disease in the 21st century: a systematic review of population-based studies. *Lancet*. 2017;390(10114):2769-78.
6. van den Brink G, Stapersma L, Vlug LE, Rizopolous D, Bodelier AG, van Wering H, Hurkmans P, Stuyt RJJ, Hendriks DM, van der Burg JAT, Utens E, and Escher JC. Clinical disease activity is associated with anxiety and depressive symptoms in adolescents and young adults with inflammatory bowel disease. *Aliment Pharmacol Ther*. 2018;48(3):358-69.
7. Xiong Q, Tang F, Li Y, Xie F, Yuan L, Yao C, Wu R, Wang J, Wang Q, and Feng P. Association of inflammatory bowel disease with suicidal ideation, suicide attempts, and suicide: A systematic review and meta-analysis. *J Psychosom Res*. 2022;160:110983.
8. Neuendorf R, Harding A, Stello N, Hanes D, and Wahbeh H. Depression and anxiety in patients with Inflammatory Bowel Disease: A systematic review. *J Psychosom Res*. 2016;87:70-80.
9. Barberio B, Zamani M, Black CJ, Savarino EV, and Ford AC. Prevalence of symptoms of anxiety and depression in patients with inflammatory bowel disease: a systematic review and meta-analysis. *Lancet Gastroenterol Hepatol*. 2021;6(5):359-70.
10. Blackwell J, Saxena S, Petersen I, Hotopf M, Creese H, Bottle A, Alexakis C, and Pollok RC. Depression in individuals who subsequently develop inflammatory bowel disease: a population-based nested case-control study. *Gut*. 2021;70(9):1642-48.
11. Frolkis AD, Vallerand IA, Shaheen AA, Lowerison MW, Swain MG, Barnabe C, Patten SB, and Kaplan GG. Depression increases the risk of inflammatory bowel disease, which may be mitigated by the use of antidepressants in the treatment of depression. *Gut*. 2019;68(9):1606-12.
12. Bernstein CN, Hitchon CA, Walld R, Bolton JM, Sareen J, Walker JR, Graff LA, Patten SB, Singer A, Lix LM, El-Gabalawy R, Katz A, Fisk JD, and Marrie RA. Increased Burden of Psychiatric Disorders in Inflammatory Bowel Disease. *Inflamm Bowel Dis*. 2019;25(2):360-68.
13. Kok KB, Byrne P, Ibarra AR, Martin P, and Rampton DS. Understanding and managing psychological disorders in patients with inflammatory bowel disease: a practical guide. *Frontline Gastroenterol*. 2023;14(1):78-86.
14. Jordi SBU, Lang BM, Auschra B, von Känel R, Biedermann L, Greuter T, Schreiner P, Rogler G, Krupka N, Sulz MC, Misselwitz B, and Bègré S. Depressive Symptoms Predict Clinical Recurrence of Inflammatory Bowel Disease. *Inflamm Bowel Dis*. 2022;28(4):560-71.
15. Dubinsky MC, Dotan I, Rubin DT, Bernauer M, Patel D, Cheung R, Modesto I, Latymer M, and Keefer L. Burden of comorbid anxiety and depression in patients with inflammatory bowel disease: a systematic literature review. *Expert Rev Gastroenterol Hepatol*. 2021;15(9):985-97.

16. Xu J, Chen X, Ma K, Nie K, Luo W, Wu X, Pan S, and Wang X. Correlation Between Sleep, Life, Mood, and Diet and Severity of Inflammatory Bowel Disease in China: A Retrospective Study. *Med Sci Monit.* 2021;27:e930511.
17. Mittermaier C, Dejaco C, Waldhoer T, Oefflerbauer-Ernst A, Miehsler W, Beier M, Tillinger W, Gangl A, and Moser G. Impact of depressive mood on relapse in patients with inflammatory bowel disease: a prospective 18-month follow-up study. *Psychosom Med.* 2004;66(1):79-84.
18. Katz L, Tripp DA, Ropeleski M, Depew W, Curtis Nickel J, Vanner S, and Beyak MJ. Mechanisms of Quality of Life and Social Support in Inflammatory Bowel Disease. *J Clin Psychol Med Settings.* 2016;23(1):88-98.
19. Yilmaz T, and Bekaroğlu E. Does interpersonal sensitivity and paranoid ideation predict nomophobia: an analysis with a young adult sample. *#N/A.* 2021:1-7.
20. Maaser C, Sturm A, Vavricka SR, Kucharzik T, Fiorino G, Annese V, Calabrese E, Baumgart DC, Bettenworth D, Borralho Nunes P, Burisch J, Castiglione F, Eliakim R, Ellul P, González-Lama Y, Gordon H, Halligan S, Katsanos K, Kopylov U, Kotze PG, Krustinš E, Laghi A, Limdi JK, Rieder F, Rimola J, Taylor SA, Tolan D, van Rhee P, Verstockt B, and Stoker J. ECCO-ESGAR Guideline for Diagnostic Assessment in IBD Part 1: Initial diagnosis, monitoring of known IBD, detection of complications. *J Crohns Colitis.* 2019;13(2):144-64.
21. Best WR, Beckett JM, and Singleton JW. Rederived values of the eight coefficients of the Crohn's Disease Activity Index (CDAI). *Gastroenterology.* 1979;77(4 Pt 2):843-6.
22. Fu H, Kaminga AC, Peng Y, Feng T, Wang T, Wu X, and Yang T. Associations between disease activity, social support and health-related quality of life in patients with inflammatory bowel diseases: the mediating role of psychological symptoms. *BMC Gastroenterol.* 2020;20(1):11.
23. Liu W, Wang J, Lyu S, Bai X, Chen X, and Li J. Effects of psychological stress and social support on quality of life of patients with ulcerative colitis. *Chinese Journal of Digestion.* 2018;38(9):613-17.
24. Schmitz N, Hartkamp N, Kiuse J, Franke GH, Reister G, and Tress W. The Symptom Check-List-90-R (SCL-90-R): a German validation study. *Qual Life Res.* 2000;9(2):185-93.
25. Schauenburg H, and Strack M. [The Symptom Checklist-90-R (SCL-90-R) for presenting statistically and clinically significant psychotherapy outcome]. *Psychother Psychosom Med Psychol.* 1998;48(7):257-64.
26. Mikocka-Walus A, Pittet V, Rossel JB, and von Känel R. Symptoms of Depression and Anxiety Are Independently Associated With Clinical Recurrence of Inflammatory Bowel Disease. *Clin Gastroenterol Hepatol.* 2016;14(6):829-35.e1.
27. Shang X, Li L, Niu C, Liao Y, and Gao S. Relationship between social support and parenting sense of competence in puerperal women: Multiple mediators of resilience and postpartum depression. *Front Psychiatry.* 2022;13:986797.
28. Slonim-Nevo V, Sarid O, Friger M, Schwartz D, Sergienko R, Pereg A, Vardi H, Singer T, Chernin E, Greenberg D, Odes S, and Israeli IBDRN. Effect of Social Support on Psychological Distress and Disease Activity in Inflammatory Bowel Disease Patients. *Inflamm Bowel Dis.* 2018;24(7):1389-400.
29. Bonaz BL, and Bernstein CN. Brain-gut interactions in inflammatory bowel disease. *Gastroenterology.* 2013;144(1):36-49.
30. Colonnello V, and Agostini A. Disease course, stress, attachment, and mentalization in patients with inflammatory bowel disease. *Med Hypotheses.* 2020;140:109665.
31. Sitnikova K, Dijkstra-Kersten SMA, Mookink LB, Terluin B, van Marwijk HWJ, Leone SS, van der Horst HE, and van der Wouden JC. Systematic review of measurement properties of questionnaires measuring somatization in primary care patients. *J Psychosom Res.* 2017;103:42-62.

- 1  
2  
3 32. Regev S, Odes S, Slonim-Nevo V, Friger M, Schwartz D, Sergienko R, Eliakim R, and Sarid O. Differential relationships of somatization, depression, and anxiety to severity of Crohn's disease. *J Health Psychol.* 2021;26(13):2390-401.
- 4  
5  
6 33. Goldring AB, Taylor SE, Kemeny ME, and Anton PA. Impact of health beliefs, quality of life, and the physician-patient relationship on the treatment intentions of inflammatory bowel disease patients. *Health Psychol.* 2002;21(3):219-28.
- 7  
8  
9 34. Veilleux S, Noiseux I, Lachapelle N, Kohen R, Vachon L, Guay BW, Bitton A, and Rioux JD. Patients' perception of their involvement in shared treatment decision making: Key factors in the treatment of inflammatory bowel disease. *Patient Educ Couns.* 2018;101(2):331-39.
- 10  
11  
12 35. Goodhand JR, Wahed M, Mawdsley JE, Farmer AD, Aziz Q, and Rampton DS. Mood disorders in inflammatory bowel disease: relation to diagnosis, disease activity, perceived stress, and other factors. *Inflamm Bowel Dis.* 2012;18(12):2301-9.
- 13  
14  
15  
16 36. Mules TC, Swaminathan A, Hirschfeld E, Borichevsky G, Frampton C, Day AS, and Geary RB. The impact of disease activity on psychological symptoms and quality of life in patients with inflammatory bowel disease-results from the Stress, Anxiety and Depression with Disease Activity (SADD) Study. *Aliment Pharmacol Ther.* 2022;55(2):201-11.
- 17  
18  
19 37. Peppas S, Pansieri C, Piovani D, Danese S, Peyrin-Biroulet L, Tsantes AG, Brunetta E, Tsantes AE, and Bonovas S. The Brain-Gut Axis: Psychological Functioning and Inflammatory Bowel Diseases. *J Clin Med.* 2021;10(3).
- 20  
21  
22 38. Feng L, Zhou N, Li Z, Fu D, Guo Y, Gao X, and Liu X. Co-occurrence of gut microbiota dysbiosis and bile acid metabolism alteration is associated with psychological disorders in Crohn's disease. *FASEB J.* 2022;36(1):e22100.
- 23  
24  
25 39. Panara AJ, Yarur AJ, Rieders B, Prokcell S, Deshpande AR, Abreu MT, and Sussman DA. The incidence and risk factors for developing depression after being diagnosed with inflammatory bowel disease: a cohort study. *Aliment Pharmacol Ther.* 2014;39(8):802-10.
- 26  
27  
28 40. Maconi G, Gridavilla D, Viganò C, Sciurti R, Asthana AK, Furfaro F, Re F, Ardizzone S, and Ba G. Perianal disease is associated with psychiatric co-morbidity in Crohn's disease in remission. *Int J Colorectal Dis.* 2014;29(10):1285-90.
- 29  
30  
31 41. Nahon S, Lahmek P, Durance C, Olympie A, Lesgourgues B, Colombel JF, and Gendre JP. Risk factors of anxiety and depression in inflammatory bowel disease. *Inflamm Bowel Dis.* 2012;18(11):2086-91.
- 32  
33  
34 42. Freitas TH, Andreoulakis E, Alves GS, Miranda HL, Braga LL, Hyphantis T, and Carvalho AF. Associations of sense of coherence with psychological distress and quality of life in inflammatory bowel disease. *World J Gastroenterol.* 2015;21(21):6713-27.
- 35  
36  
37 43. Kappelman MD, Rifas-Shiman SL, Kleinman K, Ollendorf D, Bousvaros A, Grand RJ, and Finkelstein JA. The prevalence and geographic distribution of Crohn's disease and ulcerative colitis in the United States. *Clin Gastroenterol Hepatol.* 2007;5(12):1424-9.
- 38  
39  
40 44. Benchimol EI, Manuel DG, Guttman A, Nguyen GC, Mojaverian N, Quach P, and Mack DR. Changing age demographics of inflammatory bowel disease in Ontario, Canada: a population-based cohort study of epidemiology trends. *Inflamm Bowel Dis.* 2014;20(10):1761-9.
- 41  
42  
43 45. Bernstein CN, Wajda A, Svenson LW, MacKenzie A, Koehoorn M, Jackson M, Fedorak R, Israel D, and Blanchard JF. The epidemiology of inflammatory bowel disease in Canada: a population-based study. *Am J Gastroenterol.* 2006;101(7):1559-68.
- 44  
45  
46 46. Slonim-Nevo V, Sarid O, Friger M, Schwartz D, Sergienko R, Pereg A, Vardi H, Singer T, Chernin E, Greenberg D, and Odes S. Effect of Social Support on Psychological Distress and Disease Activity in Inflammatory Bowel Disease Patients. *Inflamm Bowel Dis.* 2018;24(7):1389-400.
- 47  
48  
49 47. Barreiro-de Acosta M, Molero A, Artime E, Díaz-Cerezo S, Lizán L, de Paz HD, and Martín-Arranz MD. Epidemiological, Clinical, Patient-Reported and Economic Burden of Inflammatory Bowel
- 50  
51  
52  
53  
54  
55  
56  
57  
58  
59  
60

- 1  
2  
3 Disease (Ulcerative colitis and Crohn's disease) in Spain: A Systematic Review. *Adv Ther.*  
4 2023;40(5):1975-2014.  
5  
6 48. Lophaven SN, Lynge E, and Burisch J. The incidence of inflammatory bowel disease in Denmark  
7 1980-2013: a nationwide cohort study. *Aliment Pharmacol Ther.* 2017;45(7):961-72.  
8 49. Kim SH, Park Y, Kim SP, Lee SH, Oh SH, Yang SK, Yoon HJ, and Kim KM. Shift to a Younger Age and  
9 Regional Differences in Inflammatory Bowel Disease in Korea: Using Healthcare Administrative  
10 Data. *Dig Dis Sci.* 2022;67(11):5079-89.  
11 50. Sood A, Kaur K, Mahajan R, Midha V, Singh A, Sharma S, Puri AS, Goswami B, Desai D, Pai CG,  
12 Peddi K, Philip M, Kochhar R, Nijhawan S, Bhatia S, and Rao NS. Colitis and Crohn's Foundation  
13 (India): a first nationwide inflammatory bowel disease registry. *Intest Res.* 2021;19(2):206-16.  
14 51. Li X, Song P, Li J, Tao Y, Li G, Li X, and Yu Z. The Disease Burden and Clinical Characteristics of  
15 Inflammatory Bowel Disease in the Chinese Population: A Systematic Review and Meta-Analysis.  
16 *Int J Env Res Public Health.* 2017;14(3).  
17  
18  
19  
20  
21  
22  
23  
24  
25  
26  
27  
28  
29  
30  
31  
32  
33  
34  
35  
36  
37  
38  
39  
40  
41  
42  
43  
44  
45  
46  
47  
48  
49  
50  
51  
52  
53  
54  
55  
56  
57  
58  
59  
60

1  
2  
3  
4  
5  
6  
7  
8  
9  
10  
11  
12  
13  
14  
15  
16  
17  
18  
19  
20  
21  
22  
23  
24  
25  
26  
27  
28  
29  
30  
31  
32  
33  
34  
35  
36  
37  
38  
39  
40  
41  
42  
43  
44  
45  
46  
47  
48  
49  
50  
51  
52  
53  
54  
55  
56  
57  
58  
59  
60

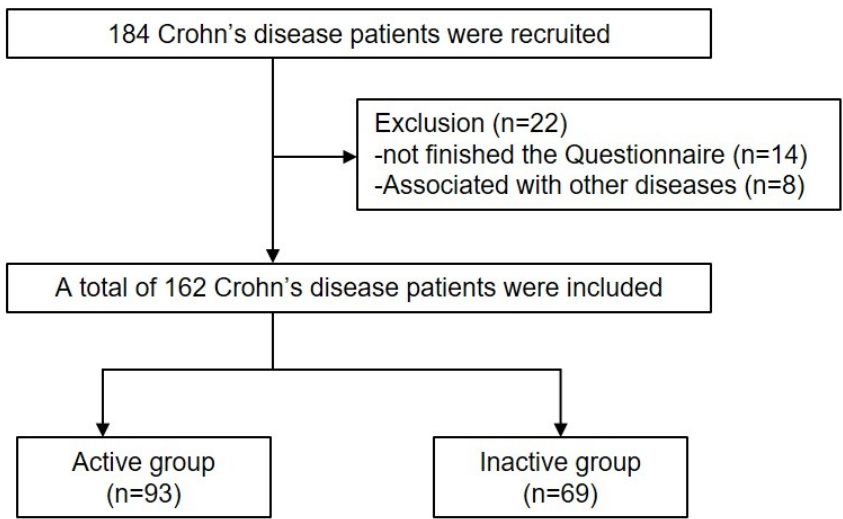

Figure 1: Flow diagram of the enrolled patients.

150x93mm (150 x 150 DPI)

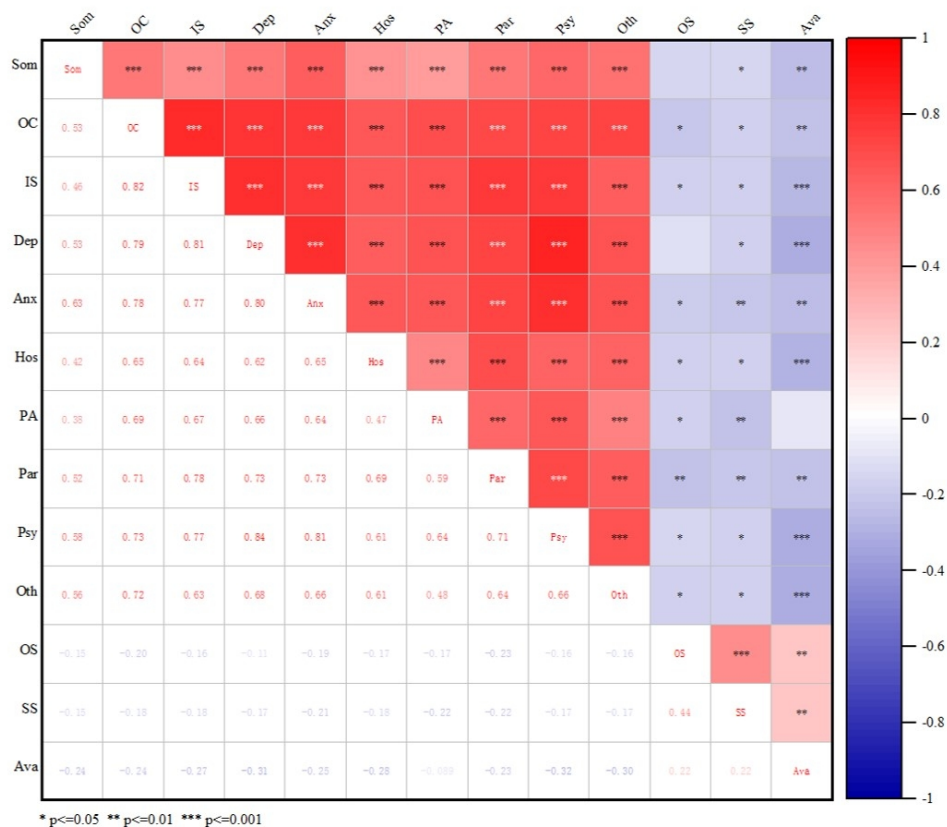

Figure 2. Analysis of the correlation of clinical data with social support and psychological factors.

192x165mm (143 x 143 DPI)

## Supplementary materials

Table 1. Baseline characteristics of the study population of different genders

| Characteristics                   | Male<br>(n=95) | Female<br>(n=67) | P value |
|-----------------------------------|----------------|------------------|---------|
| Age                               | 32±11          | 34±14            | 0.311   |
| Disease activity (active)         | 57 (60.0%)     | 36 (53.7%)       | 0.427   |
| Body Mass Index                   | 20.0±4.3       | 19.7±3.6         | 0.641   |
| Employment status                 | -              | -                |         |
| no                                | 26 (27.4%)     | 22 (32.8%)       | 0.448   |
| retired                           | 4 (4.2%)       | 5 (7.5%)         |         |
| yes                               | 65 (68.4%)     | 40 (59.7%)       |         |
| Living status                     | -              | -                |         |
| alone                             | 5 (5.3%)       | 4 (6.0%)         | 0.847   |
| with others                       | 90 (94.7%)     | 63 (94.0%)       |         |
| Education                         | -              | -                |         |
| up to 6 years                     | 4 (4.2%)       | 5 (7.5%)         | 0.776   |
| up to 9 years                     | 26 (27.4%)     | 20 (29.8%)       |         |
| up to 12 years                    | 48 (50.5%)     | 30 (44.8%)       |         |
| college                           | 17 (17.9%)     | 12 (17.9%)       |         |
| Marital status                    | -              | -                |         |
| married/cohabitating              | 52 (54.7%)     | 35 (52.2%)       | 0.736   |
| widowed/divorced                  | 8 (8.4%)       | 4 (6.0%)         |         |
| single                            | 35 (36.9%)     | 28 (41.8%)       |         |
| Montreal location                 | -              | -                |         |
| Ileal (L1)                        | 33 (34.7%)     | 30 (44.8%)       | 0.674   |
| Colonic (L2)                      | 12 (12.6%)     | 8 (11.9%)        |         |
| Ileocolon (L3)                    | 45 (47.4%)     | 27 (40.3%)       |         |
| upper gastrointestinal tract (L4) | 1 (1.1%)       | 0 (0%)           |         |
| L4+L1/L2/L3                       | 4 (4.2%)       | 2 (3.0%)         |         |
| Perianal disease                  | 36 (37.9%)     | 27 (40.3%)       | 0.757   |
| Current therapy                   | -              | -                |         |
| no treatment                      | 0 (0%)         | 2 (3.0%)         | 0.497   |
| corticosteroids                   | 9 (9.5%)       | 6 (8.9%)         |         |
| 5-aminosalicylates                | 20 (21.1%)     | 18 (26.9%)       |         |
| immunomodulators                  | 29 (30.5%)     | 20 (29.9%)       |         |
| antitumor necrosis factor         | 17 (17.8%)     | 8 (11.9%)        |         |
| combined therapy                  | 20 (21.1%)     | 13 (19.4%)       |         |
| Anemia                            | -              | -                |         |
| no                                | 63 (66.3%)     | 28 (41.8%)       | 0.021   |
| mild                              | 27 (28.4%)     | 32 (47.8%)       |         |
| moderate                          | 4 (4.2%)       | 5 (7.5%)         |         |
| severe                            | 1 (1.1%)       | 2 (2.9%)         |         |
| Relapses in the last year         | -              | -                |         |
| 0                                 | 26 (27.4%)     | 22 (32.8%)       | 0.020   |
| 1-2                               | 42 (44.2%)     | 39 (58.2%)       |         |
| 3                                 | 12 (12.6%)     | 4 (6.0%)         |         |
| ≥4                                | 15 (15.8%)     | 2 (3.0%)         |         |
| Disease duration (months)         | 13±25          | 11±19            | 0.582   |
| C-reactive protein                | 13.2±24.7      | 11.5±18.5        | 0.634   |

Note: Data are presented as the number (%) or mean±standard deviation. CD, Crohn's disease.



STROBE Statement—Checklist of items that should be included in reports of *cross-sectional studies*

|                              | Item No | Recommendation                                                                                                                                                                                    |
|------------------------------|---------|---------------------------------------------------------------------------------------------------------------------------------------------------------------------------------------------------|
| <b>Title and abstract</b>    | 1       | (a) Indicate the study's design with a commonly used term in the title or the abstract                                                                                                            |
|                              | Yes     | (b) Provide in the abstract an informative and balanced summary of what was done and what was found                                                                                               |
| <b>Introduction</b>          |         |                                                                                                                                                                                                   |
| Background/rationale         | 2       | Explain the scientific background and rationale for the investigation being reported                                                                                                              |
|                              | Yes     |                                                                                                                                                                                                   |
| Objectives                   | 3       | State specific objectives, including any prespecified hypotheses                                                                                                                                  |
|                              | Yes     |                                                                                                                                                                                                   |
| <b>Methods</b>               |         |                                                                                                                                                                                                   |
| Study design                 | 4       | Present key elements of study design early in the paper                                                                                                                                           |
|                              | Yes     |                                                                                                                                                                                                   |
| Setting                      | 5       | Describe the setting, locations, and relevant dates, including periods of recruitment, exposure, follow-up, and data collection                                                                   |
|                              | Yes     |                                                                                                                                                                                                   |
| Participants                 | 6       | (a) Give the eligibility criteria, and the sources and methods of selection of participants                                                                                                       |
|                              | Yes     |                                                                                                                                                                                                   |
| Variables                    | 7       | Clearly define all outcomes, exposures, predictors, potential confounders, and effect modifiers. Give diagnostic criteria, if applicable                                                          |
|                              | Yes     |                                                                                                                                                                                                   |
| Data sources/<br>measurement | 8*      | For each variable of interest, give sources of data and details of methods of assessment (measurement). Describe comparability of assessment methods if there is more than one group              |
|                              | Yes     |                                                                                                                                                                                                   |
| Bias                         | 9       | Describe any efforts to address potential sources of bias                                                                                                                                         |
|                              | Yes     |                                                                                                                                                                                                   |
| Study size                   | 10      | Explain how the study size was arrived at                                                                                                                                                         |
|                              | Yes     |                                                                                                                                                                                                   |
| Quantitative variables       | 11      | Explain how quantitative variables were handled in the analyses. If applicable, describe which groupings were chosen and why                                                                      |
|                              | Yes     |                                                                                                                                                                                                   |
| Statistical methods          | 12      | (a) Describe all statistical methods, including those used to control for confounding                                                                                                             |
|                              | Yes     | (b) Describe any methods used to examine subgroups and interactions                                                                                                                               |
|                              |         | (c) Explain how missing data were addressed                                                                                                                                                       |
|                              |         | (d) If applicable, describe analytical methods taking account of sampling strategy                                                                                                                |
|                              |         | (e) Describe any sensitivity analyses                                                                                                                                                             |
| <b>Results</b>               |         |                                                                                                                                                                                                   |
| Participants                 | 13*     | (a) Report numbers of individuals at each stage of study—eg numbers potentially eligible, examined for eligibility, confirmed eligible, included in the study, completing follow-up, and analysed |
|                              | Yes     | (b) Give reasons for non-participation at each stage                                                                                                                                              |
|                              |         | (c) Consider use of a flow diagram                                                                                                                                                                |
| Descriptive data             | 14*     | (a) Give characteristics of study participants (eg demographic, clinical, social) and information on exposures and potential confounders                                                          |
|                              | Yes     | (b) Indicate number of participants with missing data for each variable of interest                                                                                                               |
| Outcome data                 | 15*     | Report numbers of outcome events or summary measures                                                                                                                                              |
|                              | Yes     |                                                                                                                                                                                                   |
| Main results                 | 16      | (a) Give unadjusted estimates and, if applicable, confounder-adjusted estimates and their precision (eg, 95% confidence interval). Make clear which confounders were                              |
|                              | Yes     |                                                                                                                                                                                                   |



|                          |           |                                                                                                                                                                            |
|--------------------------|-----------|----------------------------------------------------------------------------------------------------------------------------------------------------------------------------|
|                          |           | adjusted for and why they were included                                                                                                                                    |
|                          |           | (b) Report category boundaries when continuous variables were categorized                                                                                                  |
|                          |           | (c) If relevant, consider translating estimates of relative risk into absolute risk for a meaningful time period                                                           |
| Other analyses           | 17<br>Yes | Report other analyses done—eg analyses of subgroups and interactions, and sensitivity analyses                                                                             |
| <b>Discussion</b>        |           |                                                                                                                                                                            |
| Key results              | 18<br>Yes | Summarise key results with reference to study objectives                                                                                                                   |
| Limitations              | 19<br>Yes | Discuss limitations of the study, taking into account sources of potential bias or imprecision. Discuss both direction and magnitude of any potential bias                 |
| Interpretation           | 20<br>Yes | Give a cautious overall interpretation of results considering objectives, limitations, multiplicity of analyses, results from similar studies, and other relevant evidence |
| Generalisability         | 21<br>Yes | Discuss the generalisability (external validity) of the study results                                                                                                      |
| <b>Other information</b> |           |                                                                                                                                                                            |
| Funding                  | 22<br>Yes | Give the source of funding and the role of the funders for the present study and, if applicable, for the original study on which the present article is based              |

\*Give information separately for exposed and unexposed groups.

**Note:** An Explanation and Elaboration article discusses each checklist item and gives methodological background and published examples of transparent reporting. The STROBE checklist is best used in conjunction with this article (freely available on the Web sites of PLoS Medicine at <http://www.plosmedicine.org/>, Annals of Internal Medicine at <http://www.annals.org/>, and Epidemiology at <http://www.epidem.com/>). Information on the STROBE Initiative is available at [www.strobe-statement.org](http://www.strobe-statement.org).

# BMJ Open

## Association between disease activity and psychological change among Crohn's disease: a cross-sectional study

|                                 |                                                                                                                                                                                                                                                                                                                                                                                                                                                                                                                                                                                                                                                                                                                                                                                                                                                                                                                                                                                                                                                                                                                                                                                                                                                                                                                                                                                                                                                                                                                                                                                                                                                                                                                                                                                                                                                                                                                                                                                                                                                                                                                                                                                                                     |
|---------------------------------|---------------------------------------------------------------------------------------------------------------------------------------------------------------------------------------------------------------------------------------------------------------------------------------------------------------------------------------------------------------------------------------------------------------------------------------------------------------------------------------------------------------------------------------------------------------------------------------------------------------------------------------------------------------------------------------------------------------------------------------------------------------------------------------------------------------------------------------------------------------------------------------------------------------------------------------------------------------------------------------------------------------------------------------------------------------------------------------------------------------------------------------------------------------------------------------------------------------------------------------------------------------------------------------------------------------------------------------------------------------------------------------------------------------------------------------------------------------------------------------------------------------------------------------------------------------------------------------------------------------------------------------------------------------------------------------------------------------------------------------------------------------------------------------------------------------------------------------------------------------------------------------------------------------------------------------------------------------------------------------------------------------------------------------------------------------------------------------------------------------------------------------------------------------------------------------------------------------------|
| Journal:                        | <i>BMJ Open</i>                                                                                                                                                                                                                                                                                                                                                                                                                                                                                                                                                                                                                                                                                                                                                                                                                                                                                                                                                                                                                                                                                                                                                                                                                                                                                                                                                                                                                                                                                                                                                                                                                                                                                                                                                                                                                                                                                                                                                                                                                                                                                                                                                                                                     |
| Manuscript ID                   | bmjopen-2023-076219.R2                                                                                                                                                                                                                                                                                                                                                                                                                                                                                                                                                                                                                                                                                                                                                                                                                                                                                                                                                                                                                                                                                                                                                                                                                                                                                                                                                                                                                                                                                                                                                                                                                                                                                                                                                                                                                                                                                                                                                                                                                                                                                                                                                                                              |
| Article Type:                   | Original research                                                                                                                                                                                                                                                                                                                                                                                                                                                                                                                                                                                                                                                                                                                                                                                                                                                                                                                                                                                                                                                                                                                                                                                                                                                                                                                                                                                                                                                                                                                                                                                                                                                                                                                                                                                                                                                                                                                                                                                                                                                                                                                                                                                                   |
| Date Submitted by the Author:   | 06-Sep-2023                                                                                                                                                                                                                                                                                                                                                                                                                                                                                                                                                                                                                                                                                                                                                                                                                                                                                                                                                                                                                                                                                                                                                                                                                                                                                                                                                                                                                                                                                                                                                                                                                                                                                                                                                                                                                                                                                                                                                                                                                                                                                                                                                                                                         |
| Complete List of Authors:       | <p>Huang, mengting; Huazhong University of Science and Technology, Department of Radiology, Union Hospital, Tongji Medical College, Huazhong University of Science and Technology</p> <p>Tu, Lei; Huazhong University of Science and Technology, Division of Gastroenterology, Union Hospital, Tongji Medical College, Huazhong University of Science and Technology</p> <p>Wu, Linxia; Huazhong University of Science and Technology, Department of Radiology, Union Hospital, Tongji Medical College, Huazhong University of Science and Technology</p> <p>Zou, Yan; Huazhong University of Science and Technology, Department of Radiology, Union Hospital, Tongji Medical College, Huazhong University of Science and Technology</p> <p>Li, Xin; Huazhong University of Science and Technology, Department of Radiology, Union Hospital, Tongji Medical College, Huazhong University of Science and Technology</p> <p>Yue, Xiaofei; Huazhong University of Science and Technology, Department of Radiology, Union Hospital, Tongji Medical College, Huazhong University of Science and Technology</p> <p>Huang, Chen; Huazhong University of Science and Technology, Department of Radiology, Union Hospital, Tongji Medical College, Huazhong University of Science and Technology</p> <p>Lei, Ping; Huazhong University of Science and Technology, Department of Radiology, Union Hospital, Tongji Medical College, Huazhong University of Science and Technology</p> <p>Li, Qian; Huazhong University of Science and Technology, Department of Radiology, Union Hospital, Tongji Medical College, Huazhong University of Science and Technology</p> <p>Han, Ping; Huazhong University of Science and Technology, Department of Radiology, Union Hospital, Tongji Medical College, Huazhong University of Science and Technology</p> <p>Yang, Lian; Huazhong University of Science and Technology, Department of Radiology, Union Hospital, Tongji Medical College, Huazhong University of Science and Technology</p> <p>Zhu, Liangru; Huazhong University of Science and Technology, Division of Gastroenterology, Union Hospital, Tongji Medical College, Huazhong University of Science and Technology</p> |
| <b>Primary Subject Heading</b>: | Gastroenterology and hepatology                                                                                                                                                                                                                                                                                                                                                                                                                                                                                                                                                                                                                                                                                                                                                                                                                                                                                                                                                                                                                                                                                                                                                                                                                                                                                                                                                                                                                                                                                                                                                                                                                                                                                                                                                                                                                                                                                                                                                                                                                                                                                                                                                                                     |
| Secondary Subject Heading:      | Mental health                                                                                                                                                                                                                                                                                                                                                                                                                                                                                                                                                                                                                                                                                                                                                                                                                                                                                                                                                                                                                                                                                                                                                                                                                                                                                                                                                                                                                                                                                                                                                                                                                                                                                                                                                                                                                                                                                                                                                                                                                                                                                                                                                                                                       |

1  
2  
3  
4  
5  
6  
7  
8  
9  
10  
11  
12  
13  
14  
15  
16  
17  
18  
19  
20  
21  
22  
23  
24  
25  
26  
27  
28  
29  
30  
31  
32  
33  
34  
35  
36  
37  
38  
39  
40  
41  
42  
43  
44  
45  
46  
47  
48  
49  
50  
51  
52  
53  
54  
55  
56  
57  
58  
59  
60

|           |                                                                                                  |
|-----------|--------------------------------------------------------------------------------------------------|
| Keywords: | Coeliac disease < GASTROENTEROLOGY, Inflammatory bowel disease < GASTROENTEROLOGY, MENTAL HEALTH |
|           |                                                                                                  |

SCHOLARONE™  
Manuscripts



I, the Submitting Author has the right to grant and does grant on behalf of all authors of the Work (as defined in the below author licence), an exclusive licence and/or a non-exclusive licence for contributions from authors who are: i) UK Crown employees; ii) where BMJ has agreed a CC-BY licence shall apply, and/or iii) in accordance with the terms applicable for US Federal Government officers or employees acting as part of their official duties; on a worldwide, perpetual, irrevocable, royalty-free basis to BMJ Publishing Group Ltd ("BMJ") its licensees and where the relevant Journal is co-owned by BMJ to the co-owners of the Journal, to publish the Work in this journal and any other BMJ products and to exploit all rights, as set out in our [licence](#).

The Submitting Author accepts and understands that any supply made under these terms is made by BMJ to the Submitting Author unless you are acting as an employee on behalf of your employer or a postgraduate student of an affiliated institution which is paying any applicable article publishing charge ("APC") for Open Access articles. Where the Submitting Author wishes to make the Work available on an Open Access basis (and intends to pay the relevant APC), the terms of reuse of such Open Access shall be governed by a Creative Commons licence – details of these licences and which [Creative Commons](#) licence will apply to this Work are set out in our licence referred to above.

Other than as permitted in any relevant BMJ Author's Self Archiving Policies, I confirm this Work has not been accepted for publication elsewhere, is not being considered for publication elsewhere and does not duplicate material already published. I confirm all authors consent to publication of this Work and authorise the granting of this licence.

## Association between disease activity and psychological change among Crohn's disease: a cross-sectional study

Mengting Huang<sup>1,2\*</sup>, Lei Tu<sup>3\*</sup>, Linxia Wu<sup>1,2</sup>, Yan Zou<sup>1,2</sup>, Xin Li<sup>1,2</sup>, Xiaofei Yue<sup>1,2</sup>, Chen Huang<sup>1,2</sup>, Ping Lei<sup>1,2</sup>, Qian Li<sup>1,2</sup>, Ping Han<sup>1,2</sup>, Lian Yang<sup>1,2#</sup>, Liangru Zhu<sup>3#</sup>

<sup>1</sup> Department of Radiology, Union Hospital, Tongji Medical College, Huazhong University of Science and Technology, Wuhan, 430022, China

<sup>2</sup> Hubei Province Key Laboratory of Molecular Imaging, Wuhan, 430022, China

<sup>3</sup> Division of Gastroenterology, Union Hospital, Tongji Medical College, Huazhong University of Science and Technology, Wuhan, China

\*Corresponding author:

Liangru Zhu, Ph.D

E-mail: zhuliangru@hust.edu.cn

Institutional affiliations: 1. Division of Gastroenterology, Union Hospital, Tongji Medical College, Huazhong University of Science and Technology, Wuhan, China

\*Co-Corresponding author:

Lian Yang, PhD

Email: yanglian@hust.edu.cn

Institutional affiliations: 1. Department of Radiology, Union Hospital, Tongji Medical College, Huazhong University of Science and Technology, Wuhan, 430022, China; 2. Hubei Province Key Laboratory of Molecular Imaging, Wuhan, 430022, China.

### Abstract

**Objective:** To assess the relative of social support and psychological distress in disease activity among Crohn's disease (CD) patients.

**Design:** Cross-sectional study.

**Setting:** The study was conducted in Wuhan, China between March 2020 and March 2022.

**Participants:** A total of 184 patients with CD at Union Hospital, Tongji Medical College, Huazhong University of Science and Technology were enrolled in this study; of these, 162 patients were included in the final analysis.

**Results:** A total of 162 CD patients were enrolled. Compared with CD patients in remission (CD-R), the CD patients in activity (CD-A) had higher CRP ( $P=0.001$ ), anemia ( $P<0.001$ ), and relapse rates in the last year ( $P<0.001$ ). Independent samples t-tests indicated that the CD-A group reported lower SSRS scores and higher SCL-90 scores than the CD-R group. Moreover, men with CD had lower somatization ( $P=0.030$ ) and anxiety ( $P=0.050$ ) scores than women. In binary logistic regression models, the subjective support (Beta=0.903,  $P=0.013$ ), the clinical factors of C-reactive protein (Beta=1.038,  $P=0.001$ ), and psychological distress factors of anxiety (Beta=1.443,  $P=0.008$ ) and other (Beta=1.235,  $P=0.042$ ) were disease activity predictors.

**Conclusion:** The findings highlight the importance of the psychological distress and social support factors that may play a role in CD patients' health. Interventions to address these issues should be part of management in CD.

**STRENGTHS AND LIMITATIONS OF THIS STUDY:**

- ⇒ Our study improved the understanding of the differences in psychological distress and social support among CD patients at different active stages in developing countries, especially in central China.
- ⇒ Provide evidence for subsequent studies attempting to establish a relationship between social support and psychological well-being and disease activity.
- ⇒ In this study, gender differences were considered in the analysis.
- ⇒ However, this cross-sectional study could not address the causality between disease activity and psychological change factors of patients with CD.

**Keywords:** Crohn's disease, social support, psychological distress, anxiety

## Introduction

Crohn's disease (CD) is a chronic, nonspecific intestinal inflammatory disease characterized by recurrent abdominal pain and diarrhea that peaks in young adulthood(1). In addition to gastrointestinal manifestations, CD patients experience other systemic manifestations and complications. As of 2017, inflammatory bowel disease (IBD) affected 6.8 million people worldwide. The United States reported the highest incidence of IBD, followed by the United Kingdom(2). Epidemiological studies have shown that the incidence of IBD in China is 3.44 cases per one million people, which is the highest in Asia, and the incidence of IBD in mainland China is higher in the south and lower in the north(3). In recent years, the incidence of CD has increased rapidly in China(4, 5).

Due to bowel damage and a long medical history, patients have a high prevalence of psychological impairment, such as anxiety and depression, compared to the general population(6, 7). Although medical treatments are effective in controlling gastrointestinal inflammation, the relapsing behavior of CD can cause psychological disorders. Moreover, CD patients typically require lifelong medication, which seriously affects their quality of life and increases psychological distress. The CD is associated with high medical costs, high rates of psychological disorders, and illness burdens associated with reduced productivity and activity. Studies have shown that approximately 20% of inflammatory bowel disease patients may have symptoms of anxiety, and approximately 15% have symptoms of depression(8, 9). Large population studies showed that the prevalence of psychological distress and injury in IBD patients was significantly higher than that in non-IBD adults(10, 11). And regarding the relationship between the psychological state of IBD patients and gender differences, studies have pointed out that female IBD patients are more prone to anxiety, depression, and other psychological problems than male patients(9). For example, the prevalence of comorbidity anxiety and depression in female IBD patients was 33.8% and 21.2%, respectively, compared with 22.8% and 16.2% in male IBD patients(12).

The uncertainty of treatment results and psychological disorders may lead to disease recurrence, aggravate the course of the disease, and directly lead to the decline of patients' quality of life and the increase of treatment costs(13, 14). Patients with IBD and anxiety or depression have a higher risk of hospitalization, emergency room visits, readmissions, and use of outpatient services than patients without these symptoms(15). Thus, healthcare services for CD are more demanding and costly for patients with symptoms of anxiety and depression. Xu et al. reported that poor sleep quality, anxiety, and depression were related to having inflammatory activity(16). In addition, disease activity was found to be associated with depression and anxiety, and psychological distress may increase the likelihood of disease relapse(17). However, most previous studies have focused on anxiety or depression, rarely focusing on other dimensions. Social support might be another dimension that plays a role in disease severity. Interestingly, there are few studies on the association between social support and disease activity in CD patients(18, 19).

This study aimed to improve the understanding of the differences in psychological distress and social support among CD patients at different active stages in China to provide evidence for subsequent research attempts to establish an association between social support and psychological well-being and disease activity. In addition, we considered whether sex moderates the relationship between disease activity and social support and psychological distress in CD. Previous studies of IBD patients have found that older patients have higher symptoms of anxiety and depression. Therefore, in this study, age was used as a control variable. Thus, we proposed the following hypotheses: there were significant differences in psychological disorders and social support between CD patients in activity (CD-A) and CD patients in remission (CD-R), and there may be gender differences as well.

## Methods

### Patient and Public Involvement

1  
2  
3 Patients or the public were not involved in the design, or conduct, or reporting, or dissemination plans of this  
4 research.

### 5 **Ethical aspects**

7 This study was approved by the institutional ethics committee of Tongji Medical College of Huazhong University  
8 of Science and Technology, and consent was acquired from all participants (Protocol Number ICH S016). All  
9 participants were informed of the purpose and methods of this study and provided written informed consent.

### 11 **Participants**

12 This study was a cross-sectional, single-center study. Participants were recruited between March 2020 and  
13 March 2022 at Union Hospital, Tongji Medical College, Huazhong University of Science and Technology in China.  
14 The inclusion criteria were patients with a diagnosis of CD(20), adult patients (aged 18 years or more), patients with  
15 sufficient ability in spoken and written Chinese to complete all the questionnaires, patients without a diagnosis of  
16 concomitant mental disorders or dementia and patients not taking psychotropic medication for CD. The exclusion  
17 criteria were as follows: (1) patients who could not complete the questionnaires; (2) patients who had tumors or other  
18 medical comorbidities; and (3) patients who were pregnant. The flow diagram of the enrolled patients and healthy  
19 controls is shown in Figure 1.

### 24 **Data collection**

25 Clinical and demographic data were collected, including age, sex, body mass index, employment status, living  
26 status, educational status, marital status, and disease duration. The severity of CD was assessed using Crohn's  
27 disease activity index (CDAI) scores(21). A CDAI score of less than 150 was defined as disease in remission. A CDAI  
28 score of 150 or more was defined as disease in activity.

30 Social support was assessed using the Social Support Rating Scale (SSRS)(22, 23). The participants' social  
31 support was evaluated by the Chinese version of the SSRS, which was previously demonstrated to have reliability  
32 and validity. It can measure the characteristics of social support and its relationship with participants' mental health  
33 levels, mental illness, and various physical diseases. The scale has 10 items, including items regarding objective  
34 support (3 items), subjective support (4 items), and the utilization of social support (3 items). The total score ranges  
35 from 11-59 and is acquired by adding the scores of each item. Lower scores on indices of the SSRS indicate less  
36 social support.

39 The psychological state was assessed using the Symptom Checklist-90 (SCL-90)(24, 25). The scale has a total  
40 of 90 items regarding a wide range of psychiatric symptoms, including feelings, emotions, thinking, consciousness,  
41 behaviors, habits, interpersonal relationships, diet, and sleep. Ten factors are used to reflect 10 aspects of  
42 psychological symptoms, including psychoticism, paranoid ideation, phobic anxiety, hostility, anxiety, depression,  
43 interpersonal sensitivity, obsessive-compulsive behaviors, and somatization. The statistical standard of the SCL-90  
44 mainly consists of two items: the total score and the various factor scores. The total score is the sum of the scores of  
45 the 90 items, which reflects the severity of the disease. The factor score is the average score of all factors, which  
46 ranges from "0" ("no problem") to "4" ("very serious"). Each factor reflects a certain aspect of the participant's  
47 symptoms, so the symptom distribution characteristics of the participants can be understood through the factor score.  
48 According to the results of the Chinese norm, if the total score exceeds 160 points, the positive items exceed 43  
49 points, or any factor score exceeds 2 points, the participants are considered to have a positive screening, and further  
50 examination is needed. This version has excellent internal consistency for all items.

### 56 **Statistical analysis**



All statistical analyses were performed in SPSS 26.0, GraphPad Prism 8.0, and Origin 2021 software. The independent sample T-test was used to determine the relationship between disease status and sex differences and scale factors. Correlation analysis was applied to evaluate the relationship among the clinical, psychological, and social support factors. Hierarchical multiple regression analysis (MRA) was used to examine the unique contribution of participant characteristics, psychological distress scores, and SSRS factor scores on the composite factors of disease status.  $P < 0.05$  was considered statistically significant.

## Results

### Sample characteristics

A total of 162 CD patients with complete survey responses were analyzed (CD-A  $n=93$ , CD-R  $n=69$ ). Participants in the CD-A group reported a disease course of 13 months, and those in the CD-R group reported a disease course of 11 months. The Independent Sample T-test and Chi-Square Tests indicated no statistically significant difference in age, employment status, living status, marital status, or years of education between the two groups. Compared with the CD-R group, the CD-A group had higher CRP ( $P=0.001$ ) and ESR values ( $P<0.001$ ). In addition, these patients tended to have higher anemia rates and relapse rates in the last year ( $P<0.001$ ), which is shown in Table 1. Independent samples t-tests indicated differences between the two groups, with the CD-A group reporting lower SSRS scores and higher SCL-90 scores than the CD-R group, which is shown in Table 2. Moreover, women showed higher levels of anemia rate ( $P=0.021$ ), relapse rates in the last year ( $P=0.020$ ) and somatization ( $P=0.030$ ) and anxiety ( $P=0.050$ ) than men, as shown in Table 3 and Supplementary materials Table 1.

### Preliminary analyses

Figure 2 shows the correlation between social support and the psychological distress scale. The results showed that objective support was negatively correlated with psychological distress (obsessive-compulsive, interpersonal sensitivity, anxiety, hostility, phobic anxiety, paranoid, psychoticism, and other factors) ( $P<0.05$ ). Subjective support was negatively correlated with psychological distress (somatization, obsessive-compulsive, interpersonal sensitivity, depression, anxiety, hostility, phobic anxiety, paranoid, psychoticism, and other) ( $P<0.05$ ). Availability was negatively correlated with psychological distress (somatization, obsessive-compulsive, interpersonal sensitivity, depression, anxiety, hostility, paranoid, psychoticism, and other factors) ( $P<0.05$ ).

### Binary logistic regression models

Univariate analysis suggested that C-reactive protein levels ( $P=0.001$ ), somatization ( $P=0.007$ ), obsessive compulsiveness ( $P<0.001$ ), interpersonal sensitivity ( $P<0.001$ ), depression ( $P<0.001$ ), anxiety ( $P=0.039$ ), hostility ( $P=0.015$ ), phobic anxiety ( $P=0.002$ ), paranoid ( $P=0.001$ ), psychoticism ( $P<0.001$ ), other factors ( $P<0.001$ ) and subjective support ( $P=0.003$ ) were statistically significant and were included in the subsequent binary logistic regression analysis. Binary logistic regression analyses showed that the social support factors of subjective support (Beta=0.903,  $P=0.013$ ), the clinical factors of C-reactive protein levels (Beta=1.038,  $P=0.001$ ), the psychological distress factors of anxiety (Beta=1.443,  $P=0.008$ ) and other factors (Beta=1.235,  $P=0.042$ ) were predictors of disease activity, as shown in Table 4.

## Discussion

In this study, we described clinical, social support, and psychological distress differences, and we also assessed the relationships between disease activity and dimensions of psychological distress and social support symptoms in a

1  
2  
3 cohort of CD patients. As we previously hypothesized, our present results showed that CD-A patients had higher  
4 SCL-90 and lower SSRS scores than CD-R patients, and social support factors were related to psychological distress  
5 factors, both of which had an impact on disease activity. We also found that women showed higher levels of  
6 somatization and anxiety than men, but this was not observed for social support. Finally, we found that C-reactive  
7 protein, subjective support, anxiety, and other factors were relevant determinants of disease activity in CD patients.  
8

9  
10 Psychological factors such as anxiety and depression have been studied about CD (26), but the roles of other  
11 factors such as social support have been poorly investigated. The high correlations of social support factors with  
12 psychological distress symptoms in CD patients are consistent with a previous study about other illnesses (27) and  
13 indicate that the three factors of social support are likely a concept that reflects another dimension of psychological  
14 states. Social support is defined as behavioral or emotional support provided by family members, other people, or  
15 other groups.  
16

17  
18 Social support is a positive health resource that contributes to the well-being of people with chronic diseases.  
19 The ability of an actor to derive benefits from his or her membership in a social network or other social structure. This  
20 positive support helps individuals overcome difficulties and challenges in life, especially stress related to coping with  
21 chronic illness. This is consistent with a biobehavioral model in which patients' responses to illness and health are  
22 influenced by family and peer relationships. Social support can be divided into three categories: objective support,  
23 subjective support, and availability(3). However, in populations of patients with chronic disease, there are individual  
24 differences in the use of social support. Some people can receive support at any time but refuse the help of others. In  
25 addition, interpersonal support is a process of individual interaction. Past research has shown that social support has  
26 different effects on different diseases(28).  
27

28  
29 IBD is considered a bio-psychosocial disease characterized by psychological distress and psychological or  
30 psychiatric disorders, which is associated with stress, social interactions and attachment insecurity(29, 30). Chronic  
31 diseases are thought to affect a patient's mental capacity and determine the patient's transition to attachment  
32 insecurity. Recently, several studies have begun investigating attachment dimensionality in people with IBD.  
33 According to attachment theory and research and social interaction are regulated by individual's attachment system,  
34 which begins to develop in infancy. Individuals with secure attachment styles may form positive relationships,  
35 experience a sense of self-confidence and have realistic perceptions of others. Conversely, people with anxious  
36 attachment types may have a sense of insecurity in relationships. Sound social support may provide individuals with  
37 positive emotional experiences and secure attachment styles(31, 32). Social support for family members and friends  
38 includes the ability to communicate stress problems, discuss fears and worries, make decisions together, plan social  
39 activities together, and get along together in difficult situations. This positive support helps individuals overcome  
40 difficulties and challenges in life, especially the stress associated with coping with chronic diseases. On the contrary,  
41 patients with insecure attachment may be less able to form positive relationships with doctors and less able to receive  
42 help and support from close people, which can lead to worsening disease management.  
43

44  
45 Consistent with previous research, the depressive, anxiety, and somatization factors of patients with CD are  
46 different for different disease severities(33, 34). The three factors of social support are negatively correlated with  
47 psychological distress (somatization, anxiety, anxiety, and other factors). Somatization mainly reflects the subjective  
48 body discomfort of patients, including discomfort due to cardiovascular, gastrointestinal, respiratory, and other  
49 systems, as well as headaches, backaches, and muscle soreness. Interestingly, the relationship between disease  
50 severity and most psychological distress and social support factors in addition to anxiety and subjective support  
51 factors was no longer significant after including social support factors in the model.  
52  
53  
54  
55  
56  
57  
58  
59  
60

1  
2  
3 In binary logistic regression models, we also found that subjective support factors, anxiety, other psychological  
4 distress factors, and C-reactive protein remained significant predictors of disease severity, which may be related to  
5 the fluctuating course of progression and remission that characterizes this disease. Namely, patients with CD attach  
6 particular importance to their subjective feelings and may be inclined to interpret any physical or subjective discomfort  
7 they experience as a sign of psychological distress, leading them to report lower levels of subjective support.  
8 However, these lower levels of subjective support result in worsening disease activity. This biopsychosocial  
9 explanation is consistent with what has been found in people with CD(35, 36).  
10  
11

12 In our study, the psychological dimension data were obtained from the SCL-90. The results indicate that the  
13 psychological state of CD-A is affected in some dimensions, compared with CD-R. This is consistent with the results  
14 of Goodhand, J.R., et al. (37). Neither CD-A nor CD-R met the criteria for anxiety and depression in our study. In  
15 recent years, an increasing number of doctors have realized that psychological disorders are common in  
16 inflammatory bowel disease patients and may affect the disease condition and quality of life(22, 38). However, the  
17 etiology of psychological disorders appears to be multifactorial; for example, environmental factors may include  
18 stressful life events, disease activity, disease course, medications, income, or marital status(39, 40). Regarding  
19 clinical factors, the inflammatory performance of CD may play a role in disease activity and quality of life. CD-A had  
20 higher anemia rates, CRP values, ESR values, and relapse rates. It is possible to improve the psychological state  
21 and quality of life of patients with CD through early identification and intervention.  
22  
23  
24

25 In recent years, some scholars have also studied the gender difference of IBD. At present, many studies have  
26 found that the differences in the psychological performance of IBD patients are related to gender, and females are  
27 predictors of IBD combined anxiety and depression(41, 42). However, the study of Nahon et al. pointed out that the  
28 incidence of anxiety and depression in female patients with IBD was not significantly increased, and gender was not  
29 correlated with the occurrence of anxiety and depression(43). In this study, we also found that women with CD tend  
30 to report greater depressive symptoms than men, which was consistent with previous research (34, 44). At the same  
31 time, epidemiological studies have confirmed that there are significant gender differences in the incidence of  
32 inflammatory bowel disease (IBD), and this difference shows significant regional differences. In the United States(45),  
33 Canada(46, 47), Israel(48), Spain(49), and Denmark(50), the incidence of women is higher than that of men. In Asian  
34 countries such as South Korea(51), India(52), and China(53), the incidence is higher in men than in women. The  
35 results indicate that female CD patients are more prone to anxiety and depression, which was mainly reflected in  
36 three aspects. First, women have a higher rate of anemia symptoms and disease recurrence than men, which may be  
37 more prone to psychological problems due to illness and reduced quality of life. Secondly, women are less likely than  
38 men to use immunosuppressives and biological agents. Although there were no statistically significant differences in  
39 these clinical characteristics between genders of patients with CD, which may be due to the insufficient sample size  
40 included in this study. Third, women's psychological activities are more delicate, more concerned about their  
41 symptoms, and pregnant with the next generation of problems. Therefore, in daily clinical diagnosis and treatment,  
42 more attention should be paid to whether women have mental and psychological abnormalities and their severity, and  
43 effective health education and psychological support should be provided according to the specific circumstances.  
44  
45  
46  
47  
48  
49

50 To our knowledge, this is the first study to compare the relationship between social support and disease activity  
51 across men and women with CD. The strengths of this study include the diversity of the sample in terms of social  
52 support and psychological distress scores, which allowed us to assess somatization in patients with different levels of  
53 disease activity.  
54

55 Several limitations should be considered in this study. First, this was a single-center study in which all  
56 participants were of Han nationality and from Hubei Province, China. Second, the cross-sectional nature of the data  
57  
58  
59

precludes us from concluding the causality of the relationships among social support, psychological distress, and disease activity. In the future, longitudinal research should be conducted to establish a more robust connection between various clinical, psychological, and social support factors and disease activity in CD patients.

## Conclusions

In conclusion, this study indicates the importance of considering a broader range of psychological distress and social support factors that may play a role in the health of patients with CD. Further exploration of these factors in longitudinal and intervention studies may help to develop effective CD management models.

**Contributors** M.T.H and L.T substantial contributions to the conception, design, acquisition, analysis, and interpretation of data for the work. They also draft the work or revise it critically for important intellectual content. L.X.W, Y.Z, X.L, X.F.Y, and C.H substantial contributions to the acquisition and interpretation of data for the work. P.L, Q.L, and P.H substantial contributions to revising it critically for important intellectual content. L.Y and L.R.Z substantial contributions to the conception, design, and agreement to be accountable for all aspects of the work in ensuring that questions related to the accuracy or integrity of any part of the work are appropriately investigated and resolved.

**Funding** This research were supported by Natural Science Foundation of Hubei Province(2021CFB450) and Wuhan Knowledge Innovation Special Basic Research Project (2022020801010462).

**Disclaimer** The funding sources had no role in the study conduct, data collection, analyses, data interpretation, and the decision to submit the manuscript.

**Competing interests** None declared.

**Patient consent for publication** All participants were informed of the purpose and methods of this study and provided written informed consent.

**Ethics approval** This study was approved by the institutional ethics committee of Tongji Medical College of Huazhong University of Science and Technology (Protocol Number ICH S016).

**Conflict of Interest** The authors of this manuscript declare no relationships with any companies, whose products or services may be related to the subject matter of the article.

## Statistics and Biometry:

No complex statistical methods were necessary for this paper.

**Provide Data sharing** No additional data available

1  
2  
3 Figure 1: Flow diagram of the enrolled patients.  
4  
5  
6

7 Figure 2. Analysis of the correlation of clinical data with social support and psychological factors.

8 Note: Som=somatization, OC=obsessive-compulsive, IS=interpersonal sensitivity, Dep=depression, Anx=anxiety,  
9 Hos=hostility, PA=phobic anxiety, Par=paranoid, Psy=psychoticism, Oth=other, OS=objective support, SS=subjective  
10 support, Ava=availability. \* P<=0.05; \*\* P<=0.01; \*\*\* P<=0.001.  
11  
12  
13  
14  
15  
16  
17  
18  
19  
20  
21  
22  
23  
24  
25  
26  
27  
28  
29  
30  
31  
32  
33  
34  
35  
36  
37  
38  
39  
40  
41  
42  
43  
44  
45  
46  
47  
48  
49  
50  
51  
52  
53  
54  
55  
56  
57  
58  
59  
60

Table 1. Baseline characteristics of the study population

| Characteristics                   | CD-A (n=93) | CD-R (n=69) | P value |
|-----------------------------------|-------------|-------------|---------|
| Age                               | 31±12       | 35±15       | 0.096   |
| Sex(female)                       | 36(38.7%)   | 31(44.9%)   | 0.427   |
| Body Mass Index                   | 19.5±3.9    | 20.8±4.3    | 0.049   |
| Employment status                 | -           | -           |         |
| no                                | 27 (29.0%)  | 21 (30.5%)  | 0.961   |
| retired                           | 6 (6.5%)    | 3 (4.3%)    |         |
| yes                               | 60 (64.5%)  | 45 (65.2%)  |         |
| Living status                     | -           | -           |         |
| alone                             | 3 (3.2%)    | 6 (8.7%)    | 0.248   |
| with others                       | 90 (96.8%)  | 63 (91.3%)  |         |
| Education                         | -           | -           |         |
| up to 6 years                     | 5 (5.4%)    | 4 (5.8%)    | 0.705   |
| up to 9 years                     | 28 (30.1%)  | 18 (26.1%)  |         |
| up to 12 years                    | 44 (47.3%)  | 34 (49.3%)  |         |
| college                           | 16 (17.2%)  | 13 (18.8%)  |         |
| Marital status                    | -           | -           |         |
| married/cohabitating              | 53 (57.0%)  | 34 (49.3%)  | 0.579   |
| widowed/divorced                  | 7 (7.5%)    | 5 (7.2%)    |         |
| single                            | 33 (35.5%)  | 30 (43.5%)  |         |
| Montreal location                 | -           | -           |         |
| Ileal (L1)                        | 35 (37.6%)  | 28 (40.7%)  | 0.808   |
| Colonic (L2)                      | 15 (16.2%)  | 5 (7.2%)    |         |
| Ileocolon (L3)                    | 39 (41.9%)  | 33 (47.8%)  |         |
| upper gastrointestinal tract (L4) | 1 (1.1%)    | 0 (0%)      |         |
| L4+L1/L2/L3                       | 3 (3.2%)    | 3 (4.3%)    |         |
| Montreal behavior                 | -           | -           |         |
| inflammatory                      | 52 (55.9%)  | 45 (65.2%)  | 0.401   |
| structuring                       | 24 (25.8%)  | 16 (23.2%)  |         |
| penetrating                       | 17 (18.3%)  | 8 (11.6%)   |         |
| Perianal disease                  | 35 (37.6%)  | 28 (40.6%)  | 0.704   |
| Current therapy                   | -           | -           |         |
| no treatment                      | 0 (0%)      | 2 (2.9%)    | 0.169   |
| corticosteroids                   | 8 (8.6%)    | 7 (10.1%)   |         |
| 5-aminosalicylates                | 21 (22.6%)  | 17 (24.6%)  |         |
| immunomodulators                  | 27 (29.0%)  | 22 (31.9%)  |         |
| antitumor necrosis factor         | 16 (17.2%)  | 9 (13.0%)   |         |
| combined therapy                  | 21 (22.6%)  | 12 (17.5%)  |         |
| Anemia                            | -           | -           |         |
| no                                | 36 (38.7%)  | 55 (79.7%)  | <0.001  |
| mild                              | 49 (52.7%)  | 10 (14.5%)  |         |
| moderate                          | 6 (6.5%)    | 3 (4.3%)    |         |
| severe                            | 2 (2.1%)    | 1 (1.5%)    |         |
| Relapses in the last year         | -           | -           |         |
| 0                                 | 13 (14.0%)  | 35 (50.7%)  | <0.001  |
| 1-2                               | 57 (61.3%)  | 24 (34.8%)  |         |
| 3                                 | 8 (8.6%)    | 8 (11.6%)   |         |
| ≥4                                | 15 (16.1%)  | 2 (2.9%)    |         |
| Disease duration (months)         | 13±25       | 11±19       | 0.594   |
| C-reactive protein                | 24.3±34.4   | 8.8±18.8    | 0.001   |

Note: Data are presented as the number (%) or mean±standard deviation. CD-A refers to Crohn's disease patients in activity. CD-R refers to Crohn's disease patients in remission. CD=Crohn's disease

Table 2. Questionnaire survey in for Crohn's disease patients

| Variable                  | CD-A (n=93) | CD-R (n=69) | P value |
|---------------------------|-------------|-------------|---------|
| SCL-90                    |             |             |         |
| Somatization              | 18.8±5.9    | 16.3±4.7    | 0.004   |
| Obsessive-compulsive      | 19.0±5.4    | 15.4±4.4    | <0.0001 |
| Interpersonal sensitivity | 15.4±5.8    | 12.1±4.0    | <0.0001 |
| Depression                | 24.7±9.1    | 18.3±5.2    | <0.0001 |
| Anxiety                   | 16.2±5.3    | 12.4±3.2    | <0.0001 |
| Hostility                 | 10.3±3.8    | 8.8±3.6     | 0.012   |
| Phobic anxiety            | 9.7±3.3     | 8.2±2.0     | 0.001   |
| paranoid                  | 8.9±3.2     | 7.3±2.3     | <0.0001 |
| psychoticism              | 14.9±4.3    | 12.3±3.6    | <0.0001 |
| Other                     | 12.6±3.9    | 9.9±2.5     | <0.0001 |
| SSRS                      |             |             |         |
| objective support         | 8.8±2.8     | 9.3±2.4     | 0.239   |
| Subjective Support        | 15.1±5.6    | 18.0±6.2    | 0.003   |
| availability              | 6.9±1.7     | 7.4±1.7     | 0.080   |

Note: Data are presented as the mean±standard deviation. CD-A refers to Crohn's disease patients in activity. CD-R refers to Crohn's disease patients in remission. CD=Crohn's disease; SCL-90=Check List-90; SSRS= Social Support Rating Scale.

Table 3. Differences in questionnaire survey results between men (n=95) and women (n=67).

| Variable                  | Men      | Women     | P value |
|---------------------------|----------|-----------|---------|
| SCL-90                    |          |           |         |
| Somatization              | 17.2±5.0 | 19.5±6.4  | 0.030   |
| Obsessive-compulsive      | 17.2±5.0 | 18.1±5.9  | 0.345   |
| Interpersonal sensitivity | 13.9±5.1 | 14.1±6.2  | 0.811   |
| Depression                | 21.2±7.4 | 24.0±10.0 | 0.089   |
| Anxiety                   | 14.2±4.4 | 15.8±5.6  | 0.050   |
| Hostility                 | 9.6±3.6  | 9.5±4.3   | 0.932   |
| Phobic anxiety            | 8.8±2.6  | 9.7±3.6   | 0.124   |
| paranoid                  | 8.1±2.8  | 8.5±3.4   | 0.515   |
| psychoticism              | 13.7±4.1 | 13.9±4.3  | 0.734   |
| Other                     | 11.4±3.4 | 11.7±4.3  | 0.614   |
| SSRS                      |          |           |         |
| objective support         | 8.9±2.7  | 9.1±2.6   | 0.641   |
| Subjective Support        | 16.4±5.7 | 16.1±6.6  | 0.757   |
| availability              | 7.0±1.7  | 7.3±1.7   | 0.471   |

Note: Data are presented as the mean±standard deviation. CD=Crohn's disease; SCL-90=Check List-90; SSRS= Social Support Rating Scale.



Table 4. Results of the analysis of binary logistic regression analysis on disease activity

| The factors                      | Hosmer and Lemeshow Test | S.E.  | Wald   | Beta  | 95% CI      | P value |
|----------------------------------|--------------------------|-------|--------|-------|-------------|---------|
| <b>Univariate</b>                |                          |       |        |       |             |         |
| age                              | 0.466                    | 0.012 | 2.727  | 0.980 | 0.957-1.004 | 0.099   |
| Body Mass Index                  | 0.155                    | 0.040 | 3.760  | 0.925 | 0.855-1.001 | 0.053   |
| Disease duration                 | 0.494                    | 0.007 | 0.284  | 1.004 | 0.990-1.018 | 0.594   |
| <b>C-reactive protein</b>        | 0.000                    | 0.011 | 11.378 | 1.039 | 1.016-1.062 | 0.001   |
| objective support                | 0.434                    | 0.061 | 1.389  | 0.931 | 0.827-1.049 | 0.239   |
| <b>Subjective Support</b>        | 0.339                    | 0.028 | 8.551  | 0.921 | 0.872-0.973 | 0.003   |
| availability                     | 0.504                    | 0.095 | 3.017  | 0.849 | 0.705-1.021 | 0.082   |
| Somatization                     | 0.090                    | 0.034 | 7.296  | 1.096 | 1.025-1.171 | 0.007   |
| <b>Obsessive compulsive</b>      | 0.163                    | 0.037 | 16.349 | 1.161 | 1.080-1.248 | <0.001  |
| <b>Interpersonal sensitivity</b> | 0.130                    | 0.038 | 13.650 | 1.153 | 1.069-1.243 | <0.001  |
| <b>Depression</b>                | 0.785                    | 0.032 | 19.579 | 1.154 | 1.083-1.230 | <0.001  |
| <b>Anxiety</b>                   | 0.039                    | 0.058 | 20.748 | 1.301 | 1.162-1.456 | 0.039   |
| <b>Hostility</b>                 | 0.056                    | 0.049 | 5.876  | 1.126 | 1.023-1.240 | 0.015   |
| <b>Phobic anxiety</b>            | 0.601                    | 0.079 | 9.578  | 1.275 | 1.093-1.488 | 0.002   |
| <b>Paranoid</b>                  | 0.212                    | 0.081 | 10.490 | 1.300 | 1.109-1.523 | 0.001   |
| <b>Psychoticism</b>              | 0.029                    | 0.055 | 13.645 | 1.224 | 1.099-1.362 | <0.001  |
| <b>Other</b>                     | 0.382                    | 0.061 | 18.473 | 1.301 | 1.154-1.467 | <0.001  |
| <b>Multivariate</b>              |                          |       |        |       |             |         |
| Subjective Support               |                          | 0.041 | 6.216  | 0.903 | 0.834-0.979 | 0.013   |
| C-reactive protein               | 0.519                    | 0.012 | 10.486 | 1.038 | 1.105-1.062 | 0.001   |
| Anxiety                          |                          | 0.138 | 7.009  | 1.443 | 1.100-1.893 | 0.008   |
| Other                            |                          | 0.103 | 4.155  | 1.235 | 1.008-1.512 | 0.042   |

Note: SE: standardized error, Durbin-Watson:1.980.



## References :

1. Torres J, Mehandru S, Colombel JF, et al. Crohn's disease. *Lancet*. 2017; 389: 1741-55.
2. The global, regional, and national burden of inflammatory bowel disease in 195 countries and territories, 1990-2017: a systematic analysis for the Global Burden of Disease Study 2017. *Lancet Gastroenterol Hepatol*. 2020; 5: 17-30.
3. Dai W, Zeng Y, Liang E, et al. The actuality of resilience, social support and quality of life among patients with inflammatory bowel disease in China. *Nurs Open*. 2022; 9: 2190-98.
4. Yang H, Li Y, Wu W, et al. The incidence of inflammatory bowel disease in Northern China: a prospective population-based study. *PLoS One*. 2014; 9: e101296.
5. Ng SC, Shi HY, Hamidi N, et al. Worldwide incidence and prevalence of inflammatory bowel disease in the 21st century: a systematic review of population-based studies. *Lancet*. 2017; 390: 2769-78.
6. van den Brink G, Stapersma L, Vlug LE, et al. Clinical disease activity is associated with anxiety and depressive symptoms in adolescents and young adults with inflammatory bowel disease. *Aliment Pharmacol Ther*. 2018; 48: 358-69.
7. Xiong Q, Tang F, Li Y, et al. Association of inflammatory bowel disease with suicidal ideation, suicide attempts, and suicide: A systematic review and meta-analysis. *J Psychosom Res*. 2022; 160: 110983.
8. Neuendorf R, Harding A, Stello N, et al. Depression and anxiety in patients with Inflammatory Bowel Disease: A systematic review. *J Psychosom Res*. 2016; 87: 70-80.
9. Barberio B, Zamani M, Black CJ, et al. Prevalence of symptoms of anxiety and depression in patients with inflammatory bowel disease: a systematic review and meta-analysis. *Lancet Gastroenterol Hepatol*. 2021; 6: 359-70.
10. Blackwell J, Saxena S, Petersen I, et al. Depression in individuals who subsequently develop inflammatory bowel disease: a population-based nested case-control study. *Gut*. 2021; 70: 1642-48.
11. Frolkis AD, Vallerand IA, Shaheen AA, et al. Depression increases the risk of inflammatory bowel disease, which may be mitigated by the use of antidepressants in the treatment of depression. *Gut*. 2019; 68: 1606-12.
12. Bernstein CN, Hitchon CA, Walld R, et al. Increased Burden of Psychiatric Disorders in Inflammatory Bowel Disease. *Inflamm Bowel Dis*. 2019; 25: 360-68.
13. Kok KB, Byrne P, Ibarra AR, et al. Understanding and managing psychological disorders in patients with inflammatory bowel disease: a practical guide. *Frontline Gastroenterol*. 2023; 14: 78-86.
14. Jordi SBU, Lang BM, Auschra B, et al. Depressive Symptoms Predict Clinical Recurrence of Inflammatory Bowel Disease. *Inflamm Bowel Dis*. 2022; 28: 560-71.
15. Dubinsky MC, Dotan I, Rubin DT, et al. Burden of comorbid anxiety and depression in patients with inflammatory bowel disease: a systematic literature review. *Expert Rev Gastroenterol Hepatol*. 2021; 15: 985-97.
16. Xu J, Chen X, Ma K, et al. Correlation Between Sleep, Life, Mood, and Diet and Severity of Inflammatory Bowel Disease in China: A Retrospective Study. *Med Sci Monit*. 2021; 27: e930511.
17. Mittermaier C, Dejaco C, Waldhoer T, et al. Impact of depressive mood on relapse in patients with inflammatory bowel disease: a prospective 18-month follow-up study. *Psychosom Med*. 2004; 66: 79-84.
18. Katz L, Tripp DA, Ropeleski M, et al. Mechanisms of Quality of Life and Social Support in Inflammatory Bowel Disease. *J Clin Psychol Med Settings*. 2016; 23: 88-98.
19. Yılmaz T, Bekaroglu E. Does interpersonal sensitivity and paranoid ideation predict nomophobia: an analysis with a young adult sample. *#N/A*. 2021: 1-7.
20. Maaser C, Sturm A, Vavricka SR, et al. ECCO-ESGAR Guideline for Diagnostic Assessment in IBD Part 1: Initial diagnosis, monitoring of known IBD, detection of complications. *J Crohns Colitis*. 2019; 13: 144-64.
21. Best WR, Beckett JM, Singleton JW. Rederived values of the eight coefficients of the Crohn's Disease Activity Index (CDAI). *Gastroenterology*. 1979; 77: 843-6.

22. Fu H, Kaminga AC, Peng Y, et al. Associations between disease activity, social support and health-related quality of life in patients with inflammatory bowel diseases: the mediating role of psychological symptoms. *BMC Gastroenterol.* 2020; 20: 11.
23. Liu W, Wang J, Lyu S, et al. Effects of psychological stress and social support on quality of life of patients with ulcerative colitis. *Chinese Journal of Digestion.* 2018; 38: 613-17.
24. Schmitz N, Hartkamp N, Kiuse J, et al. The Symptom Check-List-90-R (SCL-90-R): a German validation study. *Qual Life Res.* 2000; 9: 185-93.
25. Schauenburg H, Strack M. [The Symptom Checklist-90-R (SCL-90-R) for presenting statistically and clinically significant psychotherapy outcome]. *Psychother Psychosom Med Psychol.* 1998; 48: 257-64.
26. Mikocka-Walus A, Pittet V, Rossel JB, et al. Symptoms of Depression and Anxiety Are Independently Associated With Clinical Recurrence of Inflammatory Bowel Disease. *Clin Gastroenterol Hepatol.* 2016; 14: 829-35.e1.
27. Shang X, Li L, Niu C, et al. Relationship between social support and parenting sense of competence in puerperal women: Multiple mediators of resilience and postpartum depression. *Front Psychiatry.* 2022; 13: 986797.
28. Slonim-Nevo V, Sarid O, Friger M, et al. Effect of Social Support on Psychological Distress and Disease Activity in Inflammatory Bowel Disease Patients. *Inflamm Bowel Dis.* 2018; 24: 1389-400.
29. Bonaz BL, Bernstein CN. Brain-gut interactions in inflammatory bowel disease. *Gastroenterology.* 2013; 144: 36-49.
30. Agostini A, Scaiola E, Belluzzi A, et al. Attachment and Mentalizing Abilities in Patients with Inflammatory Bowel Disease. *Gastroenterol Res Pract.* 2019; 2019: 7847123.
31. Nolte T, Guiney J, Fonagy P, et al. Interpersonal stress regulation and the development of anxiety disorders: an attachment-based developmental framework. *Front Behav Neurosci.* 2011; 5: 55.
32. Colonnello V, Agostini A. Disease course, stress, attachment, and mentalization in patients with inflammatory bowel disease. *Med Hypotheses.* 2020; 140: 109665.
33. Sitnikova K, Dijkstra-Kersten SMA, Mokkink LB, et al. Systematic review of measurement properties of questionnaires measuring somatization in primary care patients. *J Psychosom Res.* 2017; 103: 42-62.
34. Regev S, Odes S, Slonim-Nevo V, et al. Differential relationships of somatization, depression, and anxiety to severity of Crohn's disease. *J Health Psychol.* 2021; 26: 2390-401.
35. Goldring AB, Taylor SE, Kemeny ME, et al. Impact of health beliefs, quality of life, and the physician-patient relationship on the treatment intentions of inflammatory bowel disease patients. *Health Psychol.* 2002; 21: 219-28.
36. Veilleux S, Noiseux I, Lachapelle N, et al. Patients' perception of their involvement in shared treatment decision making: Key factors in the treatment of inflammatory bowel disease. *Patient Educ Couns.* 2018; 101: 331-39.
37. Goodhand JR, Wahed M, Mawdsley JE, et al. Mood disorders in inflammatory bowel disease: relation to diagnosis, disease activity, perceived stress, and other factors. *Inflamm Bowel Dis.* 2012; 18: 2301-9.
38. Mules TC, Swaminathan A, Hirschfeld E, et al. The impact of disease activity on psychological symptoms and quality of life in patients with inflammatory bowel disease-results from the Stress, Anxiety and Depression with Disease Activity (SADD) Study. *Aliment Pharmacol Ther.* 2022; 55: 201-11.
39. Peppas S, Pansieri C, Piovani D, et al. The Brain-Gut Axis: Psychological Functioning and Inflammatory Bowel Diseases. *J Clin Med.* 2021; 10.
40. Feng L, Zhou N, Li Z, et al. Co-occurrence of gut microbiota dysbiosis and bile acid metabolism alteration is associated with psychological disorders in Crohn's disease. *FASEB J.* 2022; 36: e22100.
41. Panara AJ, Yarur AJ, Rieders B, et al. The incidence and risk factors for developing depression after being diagnosed with inflammatory bowel disease: a cohort study. *Aliment Pharmacol Ther.* 2014; 39: 802-10.

- 1  
2  
3 42. Maconi G, Gridavilla D, Viganò C, et al. Perianal disease is associated with psychiatric co-morbidity in  
4 Crohn's disease in remission. *Int J Colorectal Dis.* 2014; 29: 1285-90.  
5 43. Nahon S, Lahmek P, Durance C, et al. Risk factors of anxiety and depression in inflammatory bowel  
6 disease. *Inflamm Bowel Dis.* 2012; 18: 2086-91.  
7 44. Freitas TH, Andreoulakis E, Alves GS, et al. Associations of sense of coherence with psychological  
8 distress and quality of life in inflammatory bowel disease. *World J Gastroenterol.* 2015; 21: 6713-27.  
9 45. Kappelman MD, Rifas-Shiman SL, Kleinman K, et al. The prevalence and geographic distribution of  
10 Crohn's disease and ulcerative colitis in the United States. *Clin Gastroenterol Hepatol.* 2007; 5: 1424-9.  
11 46. Benchimol EI, Manuel DG, Guttman A, et al. Changing age demographics of inflammatory bowel  
12 disease in Ontario, Canada: a population-based cohort study of epidemiology trends. *Inflamm Bowel Dis.*  
13 2014; 20: 1761-9.  
14 47. Bernstein CN, Wajda A, Svenson LW, et al. The epidemiology of inflammatory bowel disease in  
15 Canada: a population-based study. *Am J Gastroenterol.* 2006; 101: 1559-68.  
16 48. Slonim-Nevo V, Sarid O, Friger M, et al. Effect of Social Support on Psychological Distress and Disease  
17 Activity in Inflammatory Bowel Disease Patients. *Inflamm Bowel Dis.* 2018; 24: 1389-400.  
18 49. Barreiro-de Acosta M, Molero A, Artime E, et al. Epidemiological, Clinical, Patient-Reported and  
19 Economic Burden of Inflammatory Bowel Disease (Ulcerative colitis and Crohn's disease) in Spain: A  
20 Systematic Review. *Adv Ther.* 2023; 40: 1975-2014.  
21 50. Lophaven SN, Lynge E, Burisch J. The incidence of inflammatory bowel disease in Denmark 1980-  
22 2013: a nationwide cohort study. *Aliment Pharmacol Ther.* 2017; 45: 961-72.  
23 51. Kim SH, Park Y, Kim SP, et al. Shift to a Younger Age and Regional Differences in Inflammatory Bowel  
24 Disease in Korea: Using Healthcare Administrative Data. *Dig Dis Sci.* 2022; 67: 5079-89.  
25 52. Sood A, Kaur K, Mahajan R, et al. Colitis and Crohn's Foundation (India): a first nationwide  
26 inflammatory bowel disease registry. *Intest Res.* 2021; 19: 206-16.  
27 53. Li X, Song P, Li J, et al. The Disease Burden and Clinical Characteristics of Inflammatory Bowel Disease  
28 in the Chinese Population: A Systematic Review and Meta-Analysis. *Int J Env Res Public Health.* 2017; 14.  
29  
30  
31  
32  
33  
34  
35  
36  
37  
38  
39  
40  
41  
42  
43  
44  
45  
46  
47  
48  
49  
50  
51  
52  
53  
54  
55  
56  
57  
58  
59  
60

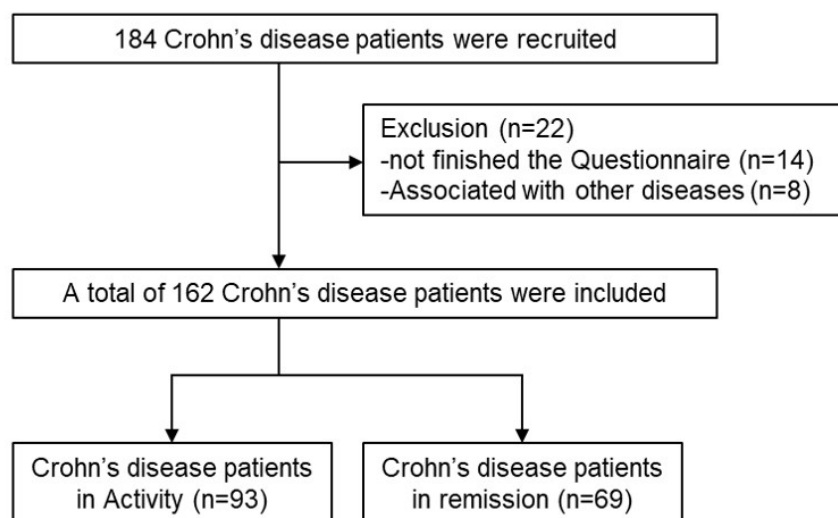

Figure 1: Flow diagram of the enrolled patients.

150x94mm (149 x 149 DPI)



Figure 2. Analysis of the correlation of clinical data with social support and psychological factors.

192x165mm (143 x 143 DPI)

## Supplementary materials

Table 1. Baseline characteristics of the study population of different genders

| Characteristics                   | Male<br>(n=95) | Female<br>(n=67) | P value |
|-----------------------------------|----------------|------------------|---------|
| Age                               | 32±11          | 34±14            | 0.311   |
| Disease activity (active)         | 57 (60.0%)     | 36 (53.7%)       | 0.427   |
| Body Mass Index                   | 20.0±4.3       | 19.7±3.6         | 0.641   |
| Employment status                 | -              | -                |         |
| no                                | 26 (27.4%)     | 22 (32.8%)       | 0.448   |
| retired                           | 4 (4.2%)       | 5 (7.5%)         |         |
| yes                               | 65 (68.4%)     | 40 (59.7%)       |         |
| Living status                     | -              | -                |         |
| alone                             | 5 (5.3%)       | 4 (6.0%)         | 0.847   |
| with others                       | 90 (94.7%)     | 63 (94.0%)       |         |
| Education                         | -              | -                |         |
| up to 6 years                     | 4 (4.2%)       | 5 (7.5%)         | 0.776   |
| up to 9 years                     | 26 (27.4%)     | 20 (29.8%)       |         |
| up to 12 years                    | 48 (50.5%)     | 30 (44.8%)       |         |
| college                           | 17 (17.9%)     | 12 (17.9%)       |         |
| Marital status                    | -              | -                |         |
| married/cohabitating              | 52 (54.7%)     | 35 (52.2%)       | 0.736   |
| widowed/divorced                  | 8 (8.4%)       | 4 (6.0%)         |         |
| single                            | 35 (36.9%)     | 28 (41.8%)       |         |
| Montreal location                 | -              | -                |         |
| Ileal (L1)                        | 33 (34.7%)     | 30 (44.8%)       | 0.674   |
| Colonic (L2)                      | 12 (12.6%)     | 8 (11.9%)        |         |
| Ileocolon (L3)                    | 45 (47.4%)     | 27 (40.3%)       |         |
| upper gastrointestinal tract (L4) | 1 (1.1%)       | 0 (0%)           |         |
| L4+L1/L2/L3                       | 4 (4.2%)       | 2 (3.0%)         |         |
| Perianal disease                  | 36 (37.9%)     | 27 (40.3%)       | 0.757   |
| Current therapy                   | -              | -                |         |
| no treatment                      | 0 (0%)         | 2 (3.0%)         | 0.497   |
| corticosteroids                   | 9 (9.5%)       | 6 (8.9%)         |         |
| 5-aminosalicylates                | 20 (21.1%)     | 18 (26.9%)       |         |
| immunomodulators                  | 29 (30.5%)     | 20 (29.9%)       |         |
| antitumor necrosis factor         | 17 (17.8%)     | 8 (11.9%)        |         |
| combined therapy                  | 20 (21.1%)     | 13 (19.4%)       |         |
| Anemia                            | -              | -                |         |
| no                                | 63 (66.3%)     | 28 (41.8%)       | 0.021   |
| mild                              | 27 (28.4%)     | 32 (47.8%)       |         |
| moderate                          | 4 (4.2%)       | 5 (7.5%)         |         |
| severe                            | 1 (1.1%)       | 2 (2.9%)         |         |
| Relapses in the last year         | -              | -                |         |
| 0                                 | 26 (27.4%)     | 22 (32.8%)       | 0.020   |
| 1-2                               | 42 (44.2%)     | 39 (58.2%)       |         |
| 3                                 | 12 (12.6%)     | 4 (6.0%)         |         |
| ≥4                                | 15 (15.8%)     | 2 (3.0%)         |         |
| Disease duration (months)         | 13±25          | 11±19            | 0.582   |
| C-reactive protein                | 13.2±24.7      | 11.5±18.5        | 0.634   |

Note: Data are presented as the number (%) or mean±standard deviation. CD, Crohn's disease.

1  
2  
3  
4  
5  
6  
7  
8  
9  
10  
11  
12  
13  
14  
15  
16  
17  
18  
19  
20  
21  
22  
23  
24  
25  
26  
27  
28  
29  
30  
31  
32  
33  
34  
35  
36  
37  
38  
39  
40  
41  
42  
43  
44  
45  
46  
47  
48  
49  
50  
51  
52  
53  
54  
55  
56  
57  
58  
59  
60STROBE Statement—Checklist of items that should be included in reports of *cross-sectional studies*

|                              | <b>Item No</b> | <b>Recommendation</b>                                                                                                                                                                             |
|------------------------------|----------------|---------------------------------------------------------------------------------------------------------------------------------------------------------------------------------------------------|
| <b>Title and abstract</b>    | 1              | (a) Indicate the study's design with a commonly used term in the title or the abstract                                                                                                            |
|                              | Yes            | (b) Provide in the abstract an informative and balanced summary of what was done and what was found                                                                                               |
| <b>Introduction</b>          |                |                                                                                                                                                                                                   |
| Background/rationale         | 2              | Explain the scientific background and rationale for the investigation being reported                                                                                                              |
|                              | Yes            |                                                                                                                                                                                                   |
| Objectives                   | 3              | State specific objectives, including any prespecified hypotheses                                                                                                                                  |
|                              | Yes            |                                                                                                                                                                                                   |
| <b>Methods</b>               |                |                                                                                                                                                                                                   |
| Study design                 | 4              | Present key elements of study design early in the paper                                                                                                                                           |
|                              | Yes            |                                                                                                                                                                                                   |
| Setting                      | 5              | Describe the setting, locations, and relevant dates, including periods of recruitment, exposure, follow-up, and data collection                                                                   |
|                              | Yes            |                                                                                                                                                                                                   |
| Participants                 | 6              | (a) Give the eligibility criteria, and the sources and methods of selection of participants                                                                                                       |
|                              | Yes            |                                                                                                                                                                                                   |
| Variables                    | 7              | Clearly define all outcomes, exposures, predictors, potential confounders, and effect modifiers. Give diagnostic criteria, if applicable                                                          |
|                              | Yes            |                                                                                                                                                                                                   |
| Data sources/<br>measurement | 8*             | For each variable of interest, give sources of data and details of methods of assessment (measurement). Describe comparability of assessment methods if there is more than one group              |
|                              | Yes            |                                                                                                                                                                                                   |
| Bias                         | 9              | Describe any efforts to address potential sources of bias                                                                                                                                         |
|                              | Yes            |                                                                                                                                                                                                   |
| Study size                   | 10             | Explain how the study size was arrived at                                                                                                                                                         |
|                              | Yes            |                                                                                                                                                                                                   |
| Quantitative variables       | 11             | Explain how quantitative variables were handled in the analyses. If applicable, describe which groupings were chosen and why                                                                      |
|                              | Yes            |                                                                                                                                                                                                   |
| Statistical methods          | 12             | (a) Describe all statistical methods, including those used to control for confounding                                                                                                             |
|                              | Yes            | (b) Describe any methods used to examine subgroups and interactions                                                                                                                               |
|                              |                | (c) Explain how missing data were addressed                                                                                                                                                       |
|                              |                | (d) If applicable, describe analytical methods taking account of sampling strategy                                                                                                                |
|                              |                | (e) Describe any sensitivity analyses                                                                                                                                                             |
| <b>Results</b>               |                |                                                                                                                                                                                                   |
| Participants                 | 13*            | (a) Report numbers of individuals at each stage of study—eg numbers potentially eligible, examined for eligibility, confirmed eligible, included in the study, completing follow-up, and analysed |
|                              | Yes            | (b) Give reasons for non-participation at each stage                                                                                                                                              |
|                              |                | (c) Consider use of a flow diagram                                                                                                                                                                |
| Descriptive data             | 14*            | (a) Give characteristics of study participants (eg demographic, clinical, social) and information on exposures and potential confounders                                                          |
|                              | Yes            | (b) Indicate number of participants with missing data for each variable of interest                                                                                                               |
| Outcome data                 | 15*            | Report numbers of outcome events or summary measures                                                                                                                                              |
|                              | Yes            |                                                                                                                                                                                                   |
| Main results                 | 16             | (a) Give unadjusted estimates and, if applicable, confounder-adjusted estimates and their precision (eg, 95% confidence interval). Make clear which confounders were                              |
|                              | Yes            |                                                                                                                                                                                                   |



|                          |           |                                                                                                                                                                            |
|--------------------------|-----------|----------------------------------------------------------------------------------------------------------------------------------------------------------------------------|
|                          |           | adjusted for and why they were included                                                                                                                                    |
|                          |           | (b) Report category boundaries when continuous variables were categorized                                                                                                  |
|                          |           | (c) If relevant, consider translating estimates of relative risk into absolute risk for a meaningful time period                                                           |
| Other analyses           | 17<br>Yes | Report other analyses done—eg analyses of subgroups and interactions, and sensitivity analyses                                                                             |
| <b>Discussion</b>        |           |                                                                                                                                                                            |
| Key results              | 18<br>Yes | Summarise key results with reference to study objectives                                                                                                                   |
| Limitations              | 19<br>Yes | Discuss limitations of the study, taking into account sources of potential bias or imprecision. Discuss both direction and magnitude of any potential bias                 |
| Interpretation           | 20<br>Yes | Give a cautious overall interpretation of results considering objectives, limitations, multiplicity of analyses, results from similar studies, and other relevant evidence |
| Generalisability         | 21<br>Yes | Discuss the generalisability (external validity) of the study results                                                                                                      |
| <b>Other information</b> |           |                                                                                                                                                                            |
| Funding                  | 22<br>Yes | Give the source of funding and the role of the funders for the present study and, if applicable, for the original study on which the present article is based              |

\*Give information separately for exposed and unexposed groups.

**Note:** An Explanation and Elaboration article discusses each checklist item and gives methodological background and published examples of transparent reporting. The STROBE checklist is best used in conjunction with this article (freely available on the Web sites of PLoS Medicine at <http://www.plosmedicine.org/>, Annals of Internal Medicine at <http://www.annals.org/>, and Epidemiology at <http://www.epidem.com/>). Information on the STROBE Initiative is available at [www.strobe-statement.org](http://www.strobe-statement.org).

# BMJ Open

## Is disease activity associated with social support and psychological distress in Crohn's disease patients? Results of a cross-sectional study in a Chinese hospital population

|                               |                                                                                                                                                                                                                                                                                                                                                                                                                                                                                                                                                                                                                                                                                                                                                                                                                                                                                                                                                                                                                                                                                                                                                                                                                                                                                                                                                                                                                                                                                                                                                                                                                                                                                                                                                                                                                                                                                                                                                                                                                                                                                                                                                                                                                                                                                                                                                                  |
|-------------------------------|------------------------------------------------------------------------------------------------------------------------------------------------------------------------------------------------------------------------------------------------------------------------------------------------------------------------------------------------------------------------------------------------------------------------------------------------------------------------------------------------------------------------------------------------------------------------------------------------------------------------------------------------------------------------------------------------------------------------------------------------------------------------------------------------------------------------------------------------------------------------------------------------------------------------------------------------------------------------------------------------------------------------------------------------------------------------------------------------------------------------------------------------------------------------------------------------------------------------------------------------------------------------------------------------------------------------------------------------------------------------------------------------------------------------------------------------------------------------------------------------------------------------------------------------------------------------------------------------------------------------------------------------------------------------------------------------------------------------------------------------------------------------------------------------------------------------------------------------------------------------------------------------------------------------------------------------------------------------------------------------------------------------------------------------------------------------------------------------------------------------------------------------------------------------------------------------------------------------------------------------------------------------------------------------------------------------------------------------------------------|
| Journal:                      | <i>BMJ Open</i>                                                                                                                                                                                                                                                                                                                                                                                                                                                                                                                                                                                                                                                                                                                                                                                                                                                                                                                                                                                                                                                                                                                                                                                                                                                                                                                                                                                                                                                                                                                                                                                                                                                                                                                                                                                                                                                                                                                                                                                                                                                                                                                                                                                                                                                                                                                                                  |
| Manuscript ID                 | bmjopen-2023-076219.R3                                                                                                                                                                                                                                                                                                                                                                                                                                                                                                                                                                                                                                                                                                                                                                                                                                                                                                                                                                                                                                                                                                                                                                                                                                                                                                                                                                                                                                                                                                                                                                                                                                                                                                                                                                                                                                                                                                                                                                                                                                                                                                                                                                                                                                                                                                                                           |
| Article Type:                 | Original research                                                                                                                                                                                                                                                                                                                                                                                                                                                                                                                                                                                                                                                                                                                                                                                                                                                                                                                                                                                                                                                                                                                                                                                                                                                                                                                                                                                                                                                                                                                                                                                                                                                                                                                                                                                                                                                                                                                                                                                                                                                                                                                                                                                                                                                                                                                                                |
| Date Submitted by the Author: | 19-Sep-2023                                                                                                                                                                                                                                                                                                                                                                                                                                                                                                                                                                                                                                                                                                                                                                                                                                                                                                                                                                                                                                                                                                                                                                                                                                                                                                                                                                                                                                                                                                                                                                                                                                                                                                                                                                                                                                                                                                                                                                                                                                                                                                                                                                                                                                                                                                                                                      |
| Complete List of Authors:     | <p>Huang, mengting; Huazhong University of Science and Technology, Department of Radiology, Union Hospital, Tongji Medical College, Huazhong University of Science and Technology; Hubei Province Key Laboratory of Molecular Imaging, Hubei Province Key Laboratory of Molecular Imaging</p> <p>Tu, Lei; Huazhong University of Science and Technology, Division of Gastroenterology, Union Hospital, Tongji Medical College, Huazhong University of Science and Technology</p> <p>Wu, Linxia; Huazhong University of Science and Technology, Department of Radiology, Union Hospital, Tongji Medical College, Huazhong University of Science and Technology; Hubei Province Key Laboratory of Molecular Imaging</p> <p>Zou, Yan; Huazhong University of Science and Technology, Department of Radiology, Union Hospital, Tongji Medical College, Huazhong University of Science and Technology; Hubei Province Key Laboratory of Molecular Imaging</p> <p>Li, Xin; Huazhong University of Science and Technology, Department of Radiology, Union Hospital, Tongji Medical College, Huazhong University of Science and Technology; Hubei Province Key Laboratory of Molecular Imaging</p> <p>Yue, Xiaofei; Huazhong University of Science and Technology, Department of Radiology, Union Hospital, Tongji Medical College, Huazhong University of Science and Technology; Hubei Province Key Laboratory of Molecular Imaging</p> <p>Huang, Chen; Huazhong University of Science and Technology, Department of Radiology, Union Hospital, Tongji Medical College, Huazhong University of Science and Technology; Hubei Province Key Laboratory of Molecular Imaging</p> <p>Lei, Ping; Huazhong University of Science and Technology, Department of Radiology, Union Hospital, Tongji Medical College, Huazhong University of Science and Technology; Hubei Province Key Laboratory of Molecular Imaging</p> <p>Li, Qian; Huazhong University of Science and Technology, Department of Radiology, Union Hospital, Tongji Medical College, Huazhong University of Science and Technology; Hubei Province Key Laboratory of Molecular Imaging</p> <p>Han, Ping; Huazhong University of Science and Technology, Department of Radiology, Union Hospital, Tongji Medical College, Huazhong University of Science and Technology; Hubei Province Key Laboratory of</p> |

|                                  |                                                                                                                                                                                                                                                                                                                                                                                                                                        |
|----------------------------------|----------------------------------------------------------------------------------------------------------------------------------------------------------------------------------------------------------------------------------------------------------------------------------------------------------------------------------------------------------------------------------------------------------------------------------------|
|                                  | Molecular Imaging<br>Yang, Lian; Huazhong University of Science and Technology, Department of Radiology, Union Hospital, Tongji Medical College, Huazhong University of Science and Technology; Hubei Province Key Laboratory of Molecular Imaging<br>Zhu, Liangru; Huazhong University of Science and Technology, Division of Gastroenterology, Union Hospital, Tongji Medical College, Huazhong University of Science and Technology |
| <b>Primary Subject Heading</b> : | Gastroenterology and hepatology                                                                                                                                                                                                                                                                                                                                                                                                        |
| Secondary Subject Heading:       | Mental health                                                                                                                                                                                                                                                                                                                                                                                                                          |
| Keywords:                        | Coeliac disease < GASTROENTEROLOGY, Inflammatory bowel disease < GASTROENTEROLOGY, MENTAL HEALTH                                                                                                                                                                                                                                                                                                                                       |
|                                  |                                                                                                                                                                                                                                                                                                                                                                                                                                        |

SCHOLARONE™  
Manuscripts



I, the Submitting Author has the right to grant and does grant on behalf of all authors of the Work (as defined in the below author licence), an exclusive licence and/or a non-exclusive licence for contributions from authors who are: i) UK Crown employees; ii) where BMJ has agreed a CC-BY licence shall apply, and/or iii) in accordance with the terms applicable for US Federal Government officers or employees acting as part of their official duties; on a worldwide, perpetual, irrevocable, royalty-free basis to BMJ Publishing Group Ltd ("BMJ") its licensees and where the relevant Journal is co-owned by BMJ to the co-owners of the Journal, to publish the Work in this journal and any other BMJ products and to exploit all rights, as set out in our [licence](#).

The Submitting Author accepts and understands that any supply made under these terms is made by BMJ to the Submitting Author unless you are acting as an employee on behalf of your employer or a postgraduate student of an affiliated institution which is paying any applicable article publishing charge ("APC") for Open Access articles. Where the Submitting Author wishes to make the Work available on an Open Access basis (and intends to pay the relevant APC), the terms of reuse of such Open Access shall be governed by a Creative Commons licence – details of these licences and which [Creative Commons](#) licence will apply to this Work are set out in our licence referred to above.

Other than as permitted in any relevant BMJ Author's Self Archiving Policies, I confirm this Work has not been accepted for publication elsewhere, is not being considered for publication elsewhere and does not duplicate material already published. I confirm all authors consent to publication of this Work and authorise the granting of this licence.

# Is disease activity associated with social support and psychological distress in Crohn's disease patients? Results of a cross-sectional study in a Chinese hospital population

Mengting Huang<sup>1,2\*</sup>, Lei Tu<sup>3\*</sup>, Linxia Wu<sup>1,2</sup>, Yan Zou<sup>1,2</sup>, Xin Li<sup>1,2</sup>, Xiaofei Yue<sup>1,2</sup>, Chen Huang<sup>1,2</sup>, Ping Lei<sup>1,2</sup>, Qian Li<sup>1,2</sup>, Ping Han<sup>1,2</sup>, Lian Yang<sup>1,2#</sup>, Liangru Zhu<sup>3#</sup>

<sup>1</sup> Department of Radiology, Union Hospital, Tongji Medical College, Huazhong University of Science and Technology, Wuhan, 430022, China

<sup>2</sup> Hubei Province Key Laboratory of Molecular Imaging, Wuhan, 430022, China

<sup>3</sup> Division of Gastroenterology, Union Hospital, Tongji Medical College, Huazhong University of Science and Technology, Wuhan, China

\*Corresponding author:

Liangru Zhu, Ph.D

E-mail: zhuliangru@hust.edu.cn

Institutional affiliations: 1. Division of Gastroenterology, Union Hospital, Tongji Medical College, Huazhong University of Science and Technology, Wuhan, China

\*Co-Corresponding author:

Lian Yang, PhD

Email: yanglian@hust.edu.cn

Institutional affiliations: 1. Department of Radiology, Union Hospital, Tongji Medical College, Huazhong University of Science and Technology, Wuhan, 430022, China; 2. Hubei Province Key Laboratory of Molecular Imaging, Wuhan, 430022, China.

## Abstract

**Objectives:** This study aims to assess the relative of social support and psychological distress in disease activity among Crohn's disease (CD) patients in China, and explore whether sex moderates the relationship between disease activity and social support and psychological distress in CD.

**Design:** Our study has a cross-sectional design.

**Setting:** This was a single-center study, which was conducted in Wuhan, China.

**Participants:** A total of 184 patients with CD at Union Hospital, Tongji Medical College, Huazhong University of Science and Technology were enrolled in this study; of these, 162 patients were included in the final analysis.

**Primary and secondary outcome measures:** The main study outcome was the CD patients' clinical and questionnaire data. The association of disease activity, social support, and psychological distress with CD patients was also evaluated based on the collected data.

**Results:** A total of 162 CD patients were enrolled. Compared with CD patients in remission (CD-R), the CD patients in activity (CD-A) had higher CRP ( $P=0.001$ ), anemia ( $P<0.001$ ), and relapse rates in the last year ( $P<0.001$ ). Independent samples t-tests indicated that the CD-A group reported lower SSRS scores and higher SCL-90 scores than the CD-R group. Moreover, men with CD had lower somatization ( $P=0.030$ ) and anxiety ( $P=0.050$ ) scores than women. In binary logistic regression models, the subjective support (Beta=0.903,  $P=0.013$ ), the clinical factors of C-

1  
2  
3 reactive protein (Beta=1.038, P=0.001), and psychological distress factors of anxiety (Beta=1.443, P=0.008) and  
4 other (Beta=1.235, P=0.042) were disease activity predictors.

5 **Conclusion:** The findings highlight the importance of the psychological distress and social support factors that may  
6 play a role in CD patients' health. Interventions to address these issues should be part of management in CD.  
7  
8  
9

#### 10 **STRENGTHS AND LIMITATIONS OF THIS STUDY:**

- 11 ⇒ Our study improved the understanding of the differences in psychological distress and social support among  
12 CD patients at different active stages in developing countries, especially in central China.
- 13 ⇒ Provide evidence for subsequent studies attempting to establish a relationship between social support and  
14 psychological well-being and disease activity.
- 15 ⇒ In this study, gender differences were considered in the analysis.
- 16 ⇒ However, this cross-sectional study could not address the causality between disease activity and  
17 psychological change factors of patients with CD.  
18  
19  
20  
21  
22

23 **Keywords:** Crohn's disease, social support, psychological distress, anxiety  
24  
25  
26  
27  
28  
29  
30  
31  
32  
33  
34  
35  
36  
37  
38  
39  
40  
41  
42  
43  
44  
45  
46  
47  
48  
49  
50  
51  
52  
53  
54  
55  
56  
57  
58  
59  
60

## Introduction

Crohn's disease (CD) is a chronic, nonspecific intestinal inflammatory disease characterized by recurrent abdominal pain and diarrhea that peaks in young adulthood(1). In addition to gastrointestinal manifestations, CD patients experience other systemic manifestations and complications. As of 2017, inflammatory bowel disease (IBD) affected 6.8 million people worldwide. The United States reported the highest incidence of IBD, followed by the United Kingdom(2). Epidemiological studies have shown that the incidence of IBD in China is 3.44 cases per one million people, which is the highest in Asia, and the incidence of IBD in mainland China is higher in the south and lower in the north(3). In recent years, the incidence of CD has increased rapidly in China(4, 5).

Due to bowel damage and a long medical history, patients have a high prevalence of psychological impairment, such as anxiety and depression, compared to the general population(6, 7). Although medical treatments are effective in controlling gastrointestinal inflammation, the relapsing behavior of CD can cause psychological disorders. Moreover, CD patients typically require lifelong medication, which seriously affects their quality of life and increases psychological distress. The CD is associated with high medical costs, high rates of psychological disorders, and illness burdens associated with reduced productivity and activity. Studies have shown that approximately 20% of inflammatory bowel disease patients may have symptoms of anxiety, and approximately 15% have symptoms of depression(8, 9). Large population studies showed that the prevalence of psychological distress and injury in IBD patients was significantly higher than that in non-IBD adults(10, 11). Regarding the relationship between the psychological state of IBD patients and gender differences, studies have pointed out that female IBD patients are more prone to anxiety, depression, and other psychological problems than male patients(9). For example, the prevalence of comorbidity anxiety and depression in female IBD patients was 33.8% and 21.2%, respectively, compared with 22.8% and 16.2% in male IBD patients(12).

The uncertainty of treatment results and psychological disorders may lead to disease recurrence, aggravate the course of the disease, and directly lead to the decline of patients' quality of life and the increase of treatment costs(13, 14). Patients with IBD and anxiety or depression have a higher risk of hospitalization, emergency room visits, readmissions, and use of outpatient services than patients without these symptoms(15). Thus, healthcare services for CD are more demanding and costly for patients with symptoms of anxiety and depression. Xu et al. reported that poor sleep quality, anxiety, and depression were related to inflammatory activity(16). In addition, disease activity was found to be associated with depression and anxiety, and psychological distress may increase the likelihood of disease relapse(17). However, most previous studies have focused on anxiety or depression, rarely focusing on other dimensions. Social support might be another dimension that plays a role in disease severity. Interestingly, there are few studies on the association between social support and disease activity in CD patients(18, 19).

This study aimed to improve the understanding of the differences in psychological distress and social support among CD patients at different active stages in China to provide evidence for subsequent research attempts to establish an association between social support and psychological well-being and disease activity. In addition, we considered whether sex moderates the relationship between disease activity and social support and psychological distress in CD. Previous studies of IBD patients have found that older patients have higher symptoms of anxiety and depression. Therefore, in this study, age was used as a control variable. Thus, we proposed the following hypotheses: there were significant differences in psychological disorders and social support between CD patients in activity (CD-A) and CD patients in remission (CD-R), and there may be gender differences as well.

## Methods

### Patient and Public Involvement



1  
2  
3 Patients or the public were not involved in the design, conduct, reporting, or dissemination plans of this research.

#### 4 **Ethical aspects**

5 This study was approved by the institutional ethics committee of Tongji Medical College of Huazhong University  
6 of Science and Technology, and consent was acquired from all participants (Protocol Number ICH S016). All  
7 participants were informed of the purpose and methods of this study and provided written informed consent.  
8

#### 9 **Participants**

10 This study was a cross-sectional, single-center study. Participants were recruited between March 2020 and  
11 March 2022 at Union Hospital, Tongji Medical College, Huazhong University of Science and Technology in China.  
12 The inclusion criteria were patients with a diagnosis of CD(20), adult patients (aged 18 years or more), patients with  
13 sufficient ability in spoken and written Chinese to complete all the questionnaires, patients without a diagnosis of  
14 concomitant mental disorders or dementia and patients not taking psychotropic medication for CD. The exclusion  
15 criteria were as follows: (1) patients who could not complete the questionnaires; (2) patients who had tumors or other  
16 medical comorbidities; and (3) patients who were pregnant. The flow diagram of the enrolled patients and healthy  
17 controls is shown in Figure 1.  
18  
19  
20  
21

#### 22 **Data collection**

23 Clinical and demographic data were collected, including age, sex, body mass index, employment status, living  
24 status, educational status, marital status, and disease duration. The severity of CD was assessed using Crohn's  
25 disease activity index (CDAI) scores(21). A CDAI score of less than 150 was defined as disease in remission. A CDAI  
26 score of 150 or more was defined as disease in activity.  
27  
28

29 Social support was assessed using the Social Support Rating Scale (SSRS)(22, 23). The participants' social  
30 support was evaluated by the Chinese version of the SSRS, which was previously demonstrated to have reliability  
31 and validity. It can measure the characteristics of social support and its relationship with participants' mental health  
32 levels, mental illness, and various physical diseases. The scale has 10 items, including items regarding objective  
33 support (3 items), subjective support (4 items), and the utilization of social support (3 items). The total score ranges  
34 from 11-59 and is acquired by adding the scores of each item. Lower scores on indices of the SSRS indicate less  
35 social support.  
36  
37

38 The psychological state was assessed using the Symptom Checklist-90 (SCL-90)(24, 25). The scale has a total  
39 of 90 items regarding a wide range of psychiatric symptoms, including feelings, emotions, thinking, consciousness,  
40 behaviors, habits, interpersonal relationships, diet, and sleep. Ten factors are used to reflect 10 aspects of  
41 psychological symptoms, including psychoticism, paranoid ideation, phobic anxiety, hostility, anxiety, depression,  
42 interpersonal sensitivity, obsessive-compulsive behaviors, and somatization. The statistical standard of the SCL-90  
43 mainly consists of two items: the total score and the various factor scores. The total score is the sum of the scores of  
44 the 90 items, which reflects the severity of the disease. The factor score is the average score of all factors, which  
45 ranges from "0" ("no problem") to "4" ("very serious"). Each factor reflects a certain aspect of the participant's  
46 symptoms, so the symptom distribution characteristics of the participants can be understood through the factor score.  
47 According to the results of the Chinese norm, if the total score exceeds 160 points, the positive items exceed 43  
48 points, or any factor score exceeds 2 points, the participants are considered to have a positive screening, and further  
49 examination is needed. This version has excellent internal consistency for all items.  
50  
51  
52  
53

#### 54 **Statistical analysis**

All statistical analyses were performed in SPSS 26.0, GraphPad Prism 8.0, and Origin 2021 software. The independent sample T-test was used to determine the relationship between disease status and sex differences and scale factors. Correlation analysis was applied to evaluate the relationship among the clinical, psychological, and social support factors. Hierarchical multiple regression analysis (MRA) was used to examine the unique contribution of participant characteristics, psychological distress scores, and SSRS factor scores on the composite factors of disease status.  $P < 0.05$  was considered statistically significant.

## Results

### Sample characteristics

A total of 162 CD patients with complete survey responses were analyzed (CD-A  $n=93$ , CD-R  $n=69$ ). Participants in the CD-A group reported a disease course of 13 months, and those in the CD-R group reported a disease course of 11 months. The Independent Sample T-test and Chi-Square Tests indicated no statistically significant difference in age, employment status, living status, marital status, or years of education between the two groups. Compared with the CD-R group, the CD-A group had higher CRP ( $P=0.001$ ) and ESR values ( $P<0.001$ ). In addition, these patients tended to have higher anemia rates and relapse rates in the last year ( $P<0.001$ ), which is shown in Table 1. Independent samples t-tests indicated differences between the two groups, with the CD-A group reporting lower SSRS scores and higher SCL-90 scores than the CD-R group, which is shown in Table 2. Moreover, women showed higher levels of anemia rate ( $P=0.021$ ), relapse rates in the last year ( $P=0.020$ ) and somatization ( $P=0.030$ ) and anxiety ( $P=0.050$ ) than men, as shown in Table 3 and Supplementary materials Table 1.

### Preliminary analyses

Figure 2 shows the correlation between social support and the psychological distress scale. The results showed that objective support was negatively correlated with psychological distress (obsessive-compulsive, interpersonal sensitivity, anxiety, hostility, phobic anxiety, paranoid, psychoticism, and other factors) ( $P<0.05$ ). Subjective support was negatively correlated with psychological distress (somatization, obsessive-compulsive, interpersonal sensitivity, depression, anxiety, hostility, phobic anxiety, paranoid, psychoticism, and other) ( $P<0.05$ ). Availability was negatively correlated with psychological distress (somatization, obsessive-compulsive, interpersonal sensitivity, depression, anxiety, hostility, paranoid, psychoticism, and other factors) ( $P<0.05$ ).

### Binary logistic regression models

Univariate analysis suggested that C-reactive protein levels ( $P=0.001$ ), somatization ( $P=0.007$ ), obsessive compulsiveness ( $P<0.001$ ), interpersonal sensitivity ( $P<0.001$ ), depression ( $P<0.001$ ), anxiety ( $P=0.039$ ), hostility ( $P=0.015$ ), phobic anxiety ( $P=0.002$ ), paranoid ( $P=0.001$ ), psychoticism ( $P<0.001$ ), other factors ( $P<0.001$ ) and subjective support ( $P=0.003$ ) were statistically significant and were included in the subsequent binary logistic regression analysis. Binary logistic regression analyses showed that the social support factors of subjective support (Beta=0.903,  $P=0.013$ ), the clinical factors of C-reactive protein levels (Beta=1.038,  $P=0.001$ ), the psychological distress factors of anxiety (Beta=1.443,  $P=0.008$ ) and other factors (Beta=1.235,  $P=0.042$ ) were predictors of disease activity, as shown in Table 4.

## Discussion

In this study, we described clinical, social support, and psychological distress differences, and we also assessed the relationships between disease activity and dimensions of psychological distress and social support symptoms in a

1  
2  
3 cohort of CD patients. As we previously hypothesized, our present results showed that CD-A patients had higher  
4 SCL-90 and lower SSRS scores than CD-R patients, and social support factors were related to psychological distress  
5 factors, both of which had an impact on disease activity. We also found that women showed higher levels of  
6 somatization and anxiety than men, but this was not observed for social support. Finally, we found that C-reactive  
7 protein, subjective support, anxiety, and other factors were relevant determinants of disease activity in CD patients.  
8

9  
10 Psychological factors such as anxiety and depression have been studied about CD (26), but the roles of other  
11 factors such as social support have been poorly investigated. The high correlations of social support factors with  
12 psychological distress symptoms in CD patients are consistent with a previous study about other illnesses (27) and  
13 indicate that the three factors of social support are likely a concept that reflects another dimension of psychological  
14 states. Social support is defined as behavioral or emotional support provided by family members, other people, or  
15 other groups.  
16

17  
18 Social support is a positive health resource that contributes to the well-being of people with chronic diseases.  
19 The ability of an actor to derive benefits from his or her membership in a social network or other social structure. This  
20 positive support helps individuals overcome difficulties and challenges in life, especially stress related to coping with  
21 chronic illness. This is consistent with a biobehavioral model in which patients' responses to illness and health are  
22 influenced by family and peer relationships. Social support can be divided into three categories: objective support,  
23 subjective support, and availability(3). However, in populations of patients with chronic disease, there are individual  
24 differences in the use of social support. Some people can receive support at any time but refuse the help of others. In  
25 addition, interpersonal support is a process of individual interaction. Past research has shown that social support has  
26 different effects on different diseases(28).  
27

28  
29 IBD is considered a bio-psychosocial disease characterized by psychological distress and psychological or  
30 psychiatric disorders, which is associated with stress, social interactions and attachment insecurity(29, 30). Chronic  
31 diseases are thought to affect a patient's mental capacity and determine the patient's transition to attachment  
32 insecurity. Recently, several studies have begun investigating attachment dimensionality in people with IBD.  
33 According to attachment theory and research and social interaction are regulated by individual's attachment system,  
34 which begins to develop in infancy. Individuals with secure attachment styles may form positive relationships,  
35 experience a sense of self-confidence and have realistic perceptions of others. Conversely, people with anxious  
36 attachment types may have a sense of insecurity in relationships. Sound social support may provide individuals with  
37 positive emotional experiences and secure attachment styles(31, 32). Social support for family members and friends  
38 includes the ability to communicate stress problems, discuss fears and worries, make decisions together, plan social  
39 activities together, and get along together in difficult situations. This positive support helps individuals overcome  
40 difficulties and challenges in life, especially the stress associated with coping with chronic diseases. On the contrary,  
41 patients with insecure attachment may be less able to form positive relationships with doctors and less able to receive  
42 help and support from close people, which can lead to worsening disease management.  
43

44  
45 Consistent with previous research, the depressive, anxiety, and somatization factors of patients with CD are  
46 different for different disease severities(33, 34). The three factors of social support are negatively correlated with  
47 psychological distress (somatization, anxiety, anxiety, and other factors). Somatization mainly reflects the subjective  
48 body discomfort of patients, including discomfort due to cardiovascular, gastrointestinal, respiratory, and other  
49 systems, as well as headaches, backaches, and muscle soreness. Interestingly, the relationship between disease  
50 severity and most psychological distress and social support factors in addition to anxiety and subjective support  
51 factors was no longer significant after including social support factors in the model.  
52  
53  
54  
55  
56  
57  
58  
59  
60

1  
2  
3 In binary logistic regression models, we also found that subjective support factors, anxiety, other psychological  
4 distress factors, and C-reactive protein remained significant predictors of disease severity, which may be related to  
5 the fluctuating course of progression and remission that characterizes this disease. Namely, patients with CD attach  
6 particular importance to their subjective feelings and may be inclined to interpret any physical or subjective discomfort  
7 they experience as a sign of psychological distress, leading them to report lower levels of subjective support.  
8 However, these lower levels of subjective support result in worsening disease activity. This biopsychosocial  
9 explanation is consistent with what has been found in people with CD(35, 36).  
10  
11

12 In our study, the psychological dimension data were obtained from the SCL-90. The results indicate that the  
13 psychological state of CD-A is affected in some dimensions, compared with CD-R. This is consistent with the results  
14 of Goodhand, J.R., et al. (37). Neither CD-A nor CD-R met the criteria for anxiety and depression in our study. In  
15 recent years, an increasing number of doctors have realized that psychological disorders are common in  
16 inflammatory bowel disease patients and may affect the disease condition and quality of life(22, 38). However, the  
17 etiology of psychological disorders appears to be multifactorial; for example, environmental factors may include  
18 stressful life events, disease activity, disease course, medications, income, or marital status(39, 40). Regarding  
19 clinical factors, the inflammatory performance of CD may play a role in disease activity and quality of life. CD-A had  
20 higher anemia rates, CRP values, ESR values, and relapse rates. It is possible to improve the psychological state  
21 and quality of life of patients with CD through early identification and intervention.  
22  
23  
24

25 In recent years, some scholars have also studied the gender difference of IBD. At present, many studies have  
26 found that the differences in the psychological performance of IBD patients are related to gender, and females are  
27 predictors of IBD combined anxiety and depression(41, 42). However, the study of Nahon et al. pointed out that the  
28 incidence of anxiety and depression in female patients with IBD was not significantly increased, and gender was not  
29 correlated with the occurrence of anxiety and depression(43). In this study, we also found that women with CD tend  
30 to report greater depressive symptoms than men, which was consistent with previous research (34, 44). At the same  
31 time, epidemiological studies have confirmed that there are significant gender differences in the incidence of  
32 inflammatory bowel disease (IBD), and this difference shows significant regional differences. In the United States(45),  
33 Canada(46, 47), Israel(48), Spain(49), and Denmark(50), the incidence of women is higher than that of men. In Asian  
34 countries such as South Korea(51), India(52), and China(53), the incidence is higher in men than in women. The  
35 results indicate that female CD patients are more prone to anxiety and depression, which was mainly reflected in  
36 three aspects. First, women have a higher rate of anemia symptoms and disease recurrence than men, which may be  
37 more prone to psychological problems due to illness and reduced quality of life. Secondly, women are less likely than  
38 men to use immunosuppressives and biological agents. Although there were no statistically significant differences in  
39 these clinical characteristics between genders of patients with CD, which may be due to the insufficient sample size  
40 included in this study. Third, women's psychological activities are more delicate, more concerned about their  
41 symptoms, and pregnant with the next generation of problems. Therefore, in daily clinical diagnosis and treatment,  
42 more attention should be paid to whether women have mental and psychological abnormalities and their severity, and  
43 effective health education and psychological support should be provided according to the specific circumstances.  
44  
45  
46  
47  
48  
49

50 To our knowledge, this is the first study to compare the relationship between social support and disease activity  
51 across men and women with CD. The strengths of this study include the diversity of the sample in terms of social  
52 support and psychological distress scores, which allowed us to assess somatization in patients with different levels of  
53 disease activity.  
54

55 Several limitations should be considered in this study. First, this was a single-center study in which all  
56 participants were of Han nationality and from Hubei Province, China. Second, the cross-sectional nature of the data  
57  
58  
59  
60

precludes us from concluding the causality of the relationships among social support, psychological distress, and disease activity. In the future, longitudinal research should be conducted to establish a more robust connection between various clinical, psychological, and social support factors and disease activity in CD patients.

## Conclusions

In conclusion, this study indicates the importance of considering a broader range of psychological distress and social support factors that may play a role in the health of patients with CD. Further exploration of these factors in longitudinal and intervention studies may help to develop effective CD management models.

**Contributors** M.T.H and L.T substantial contributions to the conception, design, acquisition, analysis, and interpretation of data for the work. They also draft the work or revise it critically for important intellectual content. L.X.W, Y.Z, X.L, X.F.Y, and C.H substantial contributions to the acquisition and interpretation of data for the work. P.L, Q.L, and P.H substantial contributions to revising it critically for important intellectual content. L.Y and L.R.Z substantial contributions to the conception, design, and agreement to be accountable for all aspects of the work in ensuring that questions related to the accuracy or integrity of any part of the work are appropriately investigated and resolved.

**Funding** This research were supported by Natural Science Foundation of Hubei Province(2021CFB450) and Wuhan Knowledge Innovation Special Basic Research Project (2022020801010462).

**Disclaimer** The funding sources had no role in the study conduct, data collection, analyses, data interpretation, and the decision to submit the manuscript.

**Competing interests** None declared.

**Patient consent for publication** All participants were informed of the purpose and methods of this study and provided written informed consent.

**Ethics approval** This study was approved by the institutional ethics committee of Tongji Medical College of Huazhong University of Science and Technology (Protocol Number ICH S016).

**Conflict of Interest** The authors of this manuscript declare no relationships with any companies, whose products or services may be related to the subject matter of the article.

## Statistics and Biometry:

No complex statistical methods were necessary for this paper.

**Provide Data sharing** No additional data available

1  
2  
3 Figure 1: Flow diagram of the enrolled patients.  
4  
5  
6

7 Figure 2. Analysis of the correlation of clinical data with social support and psychological factors.

8 Note: Som=somatization, OC=obsessive-compulsive, IS=interpersonal sensitivity, Dep=depression, Anx=anxiety,  
9 Hos=hostility, PA=phobic anxiety, Par=paranoid, Psy=psychoticism, Oth=other, OS=objective support, SS=subjective  
10 support, Ava=availability. \* P<=0.05; \*\* P<=0.01; \*\*\* P<=0.001.  
11  
12  
13  
14  
15  
16  
17  
18  
19  
20  
21  
22  
23  
24  
25  
26  
27  
28  
29  
30  
31  
32  
33  
34  
35  
36  
37  
38  
39  
40  
41  
42  
43  
44  
45  
46  
47  
48  
49  
50  
51  
52  
53  
54  
55  
56  
57  
58  
59  
60

Table 1. Baseline characteristics of the study population

| Characteristics                   | CD-A (n=93) | CD-R (n=69) | P value |
|-----------------------------------|-------------|-------------|---------|
| Age                               | 31±12       | 35±15       | 0.096   |
| Sex(female)                       | 36(38.7%)   | 31(44.9%)   | 0.427   |
| Body Mass Index                   | 19.5±3.9    | 20.8±4.3    | 0.049   |
| Employment status                 | -           | -           |         |
| no                                | 27 (29.0%)  | 21 (30.5%)  | 0.961   |
| retired                           | 6 (6.5%)    | 3 (4.3%)    |         |
| yes                               | 60 (64.5%)  | 45 (65.2%)  |         |
| Living status                     | -           | -           |         |
| alone                             | 3 (3.2%)    | 6 (8.7%)    | 0.248   |
| with others                       | 90 (96.8%)  | 63 (91.3%)  |         |
| Education                         | -           | -           |         |
| up to 6 years                     | 5 (5.4%)    | 4 (5.8%)    | 0.705   |
| up to 9 years                     | 28 (30.1%)  | 18 (26.1%)  |         |
| up to 12 years                    | 44 (47.3%)  | 34 (49.3%)  |         |
| college                           | 16 (17.2%)  | 13 (18.8%)  |         |
| Marital status                    | -           | -           |         |
| married/cohabitating              | 53 (57.0%)  | 34 (49.3%)  | 0.579   |
| widowed/divorced                  | 7 (7.5%)    | 5 (7.2%)    |         |
| single                            | 33 (35.5%)  | 30 (43.5%)  |         |
| Montreal location                 | -           | -           |         |
| Ileal (L1)                        | 35 (37.6%)  | 28 (40.7%)  | 0.808   |
| Colonic (L2)                      | 15 (16.2%)  | 5 (7.2%)    |         |
| Ileocolon (L3)                    | 39 (41.9%)  | 33 (47.8%)  |         |
| upper gastrointestinal tract (L4) | 1 (1.1%)    | 0 (0%)      |         |
| L4+L1/L2/L3                       | 3 (3.2%)    | 3 (4.3%)    |         |
| Montreal behavior                 | -           | -           |         |
| inflammatory                      | 52 (55.9%)  | 45 (65.2%)  | 0.401   |
| structuring                       | 24 (25.8%)  | 16 (23.2%)  |         |
| penetrating                       | 17 (18.3%)  | 8 (11.6%)   |         |
| Perianal disease                  | 35 (37.6%)  | 28 (40.6%)  | 0.704   |
| Current therapy                   | -           | -           |         |
| no treatment                      | 0 (0%)      | 2 (2.9%)    | 0.169   |
| corticosteroids                   | 8 (8.6%)    | 7 (10.1%)   |         |
| 5-aminosalicylates                | 21 (22.6%)  | 17 (24.6%)  |         |
| immunomodulators                  | 27 (29.0%)  | 22 (31.9%)  |         |
| antitumor necrosis factor         | 16 (17.2%)  | 9 (13.0%)   |         |
| combined therapy                  | 21 (22.6%)  | 12 (17.5%)  |         |
| Anemia                            | -           | -           |         |
| no                                | 36 (38.7%)  | 55 (79.7%)  | <0.001  |
| mild                              | 49 (52.7%)  | 10 (14.5%)  |         |
| moderate                          | 6 (6.5%)    | 3 (4.3%)    |         |
| severe                            | 2 (2.1%)    | 1 (1.5%)    |         |
| Relapses in the last year         | -           | -           |         |
| 0                                 | 13 (14.0%)  | 35 (50.7%)  | <0.001  |
| 1-2                               | 57 (61.3%)  | 24 (34.8%)  |         |
| 3                                 | 8 (8.6%)    | 8 (11.6%)   |         |
| ≥4                                | 15 (16.1%)  | 2 (2.9%)    |         |
| Disease duration (months)         | 13±25       | 11±19       | 0.594   |
| C-reactive protein                | 24.3±34.4   | 8.8±18.8    | 0.001   |

Note: Data are presented as the number (%) or mean±standard deviation. CD-A refers to Crohn's disease patients in activity. CD-R refers to Crohn's disease patients in remission. CD=Crohn's disease



Table 2. Questionnaire survey in for Crohn's disease patients

| Variable                  | CD-A (n=93) | CD-R (n=69) | P value |
|---------------------------|-------------|-------------|---------|
| SCL-90                    |             |             |         |
| Somatization              | 18.8±5.9    | 16.3±4.7    | 0.004   |
| Obsessive-compulsive      | 19.0±5.4    | 15.4±4.4    | <0.0001 |
| Interpersonal sensitivity | 15.4±5.8    | 12.1±4.0    | <0.0001 |
| Depression                | 24.7±9.1    | 18.3±5.2    | <0.0001 |
| Anxiety                   | 16.2±5.3    | 12.4±3.2    | <0.0001 |
| Hostility                 | 10.3±3.8    | 8.8±3.6     | 0.012   |
| Phobic anxiety            | 9.7±3.3     | 8.2±2.0     | 0.001   |
| paranoid                  | 8.9±3.2     | 7.3±2.3     | <0.0001 |
| psychoticism              | 14.9±4.3    | 12.3±3.6    | <0.0001 |
| Other                     | 12.6±3.9    | 9.9±2.5     | <0.0001 |
| SSRS                      |             |             |         |
| objective support         | 8.8±2.8     | 9.3±2.4     | 0.239   |
| Subjective Support        | 15.1±5.6    | 18.0±6.2    | 0.003   |
| availability              | 6.9±1.7     | 7.4±1.7     | 0.080   |

Note: Data are presented as the mean±standard deviation. CD-A refers to Crohn's disease patients in activity. CD-R refers to Crohn's disease patients in remission. CD=Crohn's disease; SCL-90=Check List-90; SSRS= Social Support Rating Scale.

Table 3. Differences in questionnaire survey results between men (n=95) and women (n=67).

| Variable                  | Men      | Women     | P value |
|---------------------------|----------|-----------|---------|
| SCL-90                    |          |           |         |
| Somatization              | 17.2±5.0 | 19.5±6.4  | 0.030   |
| Obsessive-compulsive      | 17.2±5.0 | 18.1±5.9  | 0.345   |
| Interpersonal sensitivity | 13.9±5.1 | 14.1±6.2  | 0.811   |
| Depression                | 21.2±7.4 | 24.0±10.0 | 0.089   |
| Anxiety                   | 14.2±4.4 | 15.8±5.6  | 0.050   |
| Hostility                 | 9.6±3.6  | 9.5±4.3   | 0.932   |
| Phobic anxiety            | 8.8±2.6  | 9.7±3.6   | 0.124   |
| paranoid                  | 8.1±2.8  | 8.5±3.4   | 0.515   |
| psychoticism              | 13.7±4.1 | 13.9±4.3  | 0.734   |
| Other                     | 11.4±3.4 | 11.7±4.3  | 0.614   |
| SSRS                      |          |           |         |
| objective support         | 8.9±2.7  | 9.1±2.6   | 0.641   |
| Subjective Support        | 16.4±5.7 | 16.1±6.6  | 0.757   |
| availability              | 7.0±1.7  | 7.3±1.7   | 0.471   |

Note: Data are presented as the mean±standard deviation. CD=Crohn's disease; SCL-90=Check List-90; SSRS= Social Support Rating Scale.



Table 4. Results of the analysis of binary logistic regression analysis on disease activity

| The factors                      | Hosmer and Lemeshow Test | S.E.  | Wald   | Beta  | 95% CI      | P value |
|----------------------------------|--------------------------|-------|--------|-------|-------------|---------|
| <b>Univariate</b>                |                          |       |        |       |             |         |
| age                              | 0.466                    | 0.012 | 2.727  | 0.980 | 0.957-1.004 | 0.099   |
| Body Mass Index                  | 0.155                    | 0.040 | 3.760  | 0.925 | 0.855-1.001 | 0.053   |
| Disease duration                 | 0.494                    | 0.007 | 0.284  | 1.004 | 0.990-1.018 | 0.594   |
| <b>C-reactive protein</b>        | 0.000                    | 0.011 | 11.378 | 1.039 | 1.016-1.062 | 0.001   |
| objective support                | 0.434                    | 0.061 | 1.389  | 0.931 | 0.827-1.049 | 0.239   |
| <b>Subjective Support</b>        | 0.339                    | 0.028 | 8.551  | 0.921 | 0.872-0.973 | 0.003   |
| availability                     | 0.504                    | 0.095 | 3.017  | 0.849 | 0.705-1.021 | 0.082   |
| Somatization                     | 0.090                    | 0.034 | 7.296  | 1.096 | 1.025-1.171 | 0.007   |
| <b>Obsessive compulsive</b>      | 0.163                    | 0.037 | 16.349 | 1.161 | 1.080-1.248 | <0.001  |
| <b>Interpersonal sensitivity</b> | 0.130                    | 0.038 | 13.650 | 1.153 | 1.069-1.243 | <0.001  |
| <b>Depression</b>                | 0.785                    | 0.032 | 19.579 | 1.154 | 1.083-1.230 | <0.001  |
| <b>Anxiety</b>                   | 0.039                    | 0.058 | 20.748 | 1.301 | 1.162-1.456 | 0.039   |
| <b>Hostility</b>                 | 0.056                    | 0.049 | 5.876  | 1.126 | 1.023-1.240 | 0.015   |
| <b>Phobic anxiety</b>            | 0.601                    | 0.079 | 9.578  | 1.275 | 1.093-1.488 | 0.002   |
| <b>Paranoid</b>                  | 0.212                    | 0.081 | 10.490 | 1.300 | 1.109-1.523 | 0.001   |
| <b>Psychoticism</b>              | 0.029                    | 0.055 | 13.645 | 1.224 | 1.099-1.362 | <0.001  |
| <b>Other</b>                     | 0.382                    | 0.061 | 18.473 | 1.301 | 1.154-1.467 | <0.001  |
| <b>Multivariate</b>              |                          |       |        |       |             |         |
| Subjective Support               |                          | 0.041 | 6.216  | 0.903 | 0.834-0.979 | 0.013   |
| C-reactive protein               | 0.519                    | 0.012 | 10.486 | 1.038 | 1.105-1.062 | 0.001   |
| Anxiety                          |                          | 0.138 | 7.009  | 1.443 | 1.100-1.893 | 0.008   |
| Other                            |                          | 0.103 | 4.155  | 1.235 | 1.008-1.512 | 0.042   |

Note: SE: standardized error, Durbin-Watson:1.980.

## References :

1. Torres J, Mehandru S, Colombel JF, et al. Crohn's disease. *Lancet*. 2017; 389: 1741-55.
2. The global, regional, and national burden of inflammatory bowel disease in 195 countries and territories, 1990-2017: a systematic analysis for the Global Burden of Disease Study 2017. *Lancet Gastroenterol Hepatol*. 2020; 5: 17-30.
3. Dai W, Zeng Y, Liang E, et al. The actuality of resilience, social support and quality of life among patients with inflammatory bowel disease in China. *Nurs Open*. 2022; 9: 2190-98.
4. Yang H, Li Y, Wu W, et al. The incidence of inflammatory bowel disease in Northern China: a prospective population-based study. *PLoS One*. 2014; 9: e101296.
5. Ng SC, Shi HY, Hamidi N, et al. Worldwide incidence and prevalence of inflammatory bowel disease in the 21st century: a systematic review of population-based studies. *Lancet*. 2017; 390: 2769-78.
6. van den Brink G, Stapersma L, Vlug LE, et al. Clinical disease activity is associated with anxiety and depressive symptoms in adolescents and young adults with inflammatory bowel disease. *Aliment Pharmacol Ther*. 2018; 48: 358-69.
7. Xiong Q, Tang F, Li Y, et al. Association of inflammatory bowel disease with suicidal ideation, suicide attempts, and suicide: A systematic review and meta-analysis. *J Psychosom Res*. 2022; 160: 110983.
8. Neuendorf R, Harding A, Stello N, et al. Depression and anxiety in patients with Inflammatory Bowel Disease: A systematic review. *J Psychosom Res*. 2016; 87: 70-80.
9. Barberio B, Zamani M, Black CJ, et al. Prevalence of symptoms of anxiety and depression in patients with inflammatory bowel disease: a systematic review and meta-analysis. *Lancet Gastroenterol Hepatol*. 2021; 6: 359-70.
10. Blackwell J, Saxena S, Petersen I, et al. Depression in individuals who subsequently develop inflammatory bowel disease: a population-based nested case-control study. *Gut*. 2021; 70: 1642-48.
11. Frolkis AD, Vallerand IA, Shaheen AA, et al. Depression increases the risk of inflammatory bowel disease, which may be mitigated by the use of antidepressants in the treatment of depression. *Gut*. 2019; 68: 1606-12.
12. Bernstein CN, Hitchon CA, Walld R, et al. Increased Burden of Psychiatric Disorders in Inflammatory Bowel Disease. *Inflamm Bowel Dis*. 2019; 25: 360-68.
13. Kok KB, Byrne P, Ibarra AR, et al. Understanding and managing psychological disorders in patients with inflammatory bowel disease: a practical guide. *Frontline Gastroenterol*. 2023; 14: 78-86.
14. Jordi SBU, Lang BM, Auschra B, et al. Depressive Symptoms Predict Clinical Recurrence of Inflammatory Bowel Disease. *Inflamm Bowel Dis*. 2022; 28: 560-71.
15. Dubinsky MC, Dotan I, Rubin DT, et al. Burden of comorbid anxiety and depression in patients with inflammatory bowel disease: a systematic literature review. *Expert Rev Gastroenterol Hepatol*. 2021; 15: 985-97.
16. Xu J, Chen X, Ma K, et al. Correlation Between Sleep, Life, Mood, and Diet and Severity of Inflammatory Bowel Disease in China: A Retrospective Study. *Med Sci Monit*. 2021; 27: e930511.
17. Mittermaier C, Dejaco C, Waldhoer T, et al. Impact of depressive mood on relapse in patients with inflammatory bowel disease: a prospective 18-month follow-up study. *Psychosom Med*. 2004; 66: 79-84.
18. Katz L, Tripp DA, Ropeleski M, et al. Mechanisms of Quality of Life and Social Support in Inflammatory Bowel Disease. *J Clin Psychol Med Settings*. 2016; 23: 88-98.
19. Yilmaz T, Bekaroğlu E. Does interpersonal sensitivity and paranoid ideation predict nomophobia: an analysis with a young adult sample. #N/A. 2021: 1-7.
20. Maaser C, Sturm A, Vavricka SR, et al. ECCO-ESGAR Guideline for Diagnostic Assessment in IBD Part 1: Initial diagnosis, monitoring of known IBD, detection of complications. *J Crohns Colitis*. 2019; 13: 144-64.
21. Best WR, Bectel JM, Singleton JW. Rederived values of the eight coefficients of the Crohn's Disease Activity Index (CDAI). *Gastroenterology*. 1979; 77: 843-6.

22. Fu H, Kaminga AC, Peng Y, et al. Associations between disease activity, social support and health-related quality of life in patients with inflammatory bowel diseases: the mediating role of psychological symptoms. *BMC Gastroenterol.* 2020; 20: 11.
23. Liu W, Wang J, Lyu S, et al. Effects of psychological stress and social support on quality of life of patients with ulcerative colitis. *Chinese Journal of Digestion.* 2018; 38: 613-17.
24. Schmitz N, Hartkamp N, Kiuse J, et al. The Symptom Check-List-90-R (SCL-90-R): a German validation study. *Qual Life Res.* 2000; 9: 185-93.
25. Schauenburg H, Strack M. [The Symptom Checklist-90-R (SCL-90-R) for presenting statistically and clinically significant psychotherapy outcome]. *Psychother Psychosom Med Psychol.* 1998; 48: 257-64.
26. Mikocka-Walus A, Pittet V, Rossel JB, et al. Symptoms of Depression and Anxiety Are Independently Associated With Clinical Recurrence of Inflammatory Bowel Disease. *Clin Gastroenterol Hepatol.* 2016; 14: 829-35.e1.
27. Shang X, Li L, Niu C, et al. Relationship between social support and parenting sense of competence in puerperal women: Multiple mediators of resilience and postpartum depression. *Front Psychiatry.* 2022; 13: 986797.
28. Slonim-Nevo V, Sarid O, Friger M, et al. Effect of Social Support on Psychological Distress and Disease Activity in Inflammatory Bowel Disease Patients. *Inflamm Bowel Dis.* 2018; 24: 1389-400.
29. Bonaz BL, Bernstein CN. Brain-gut interactions in inflammatory bowel disease. *Gastroenterology.* 2013; 144: 36-49.
30. Agostini A, Scaioni E, Belluzzi A, et al. Attachment and Mentalizing Abilities in Patients with Inflammatory Bowel Disease. *Gastroenterol Res Pract.* 2019; 2019: 7847123.
31. Nolte T, Guiney J, Fonagy P, et al. Interpersonal stress regulation and the development of anxiety disorders: an attachment-based developmental framework. *Front Behav Neurosci.* 2011; 5: 55.
32. Colonnello V, Agostini A. Disease course, stress, attachment, and mentalization in patients with inflammatory bowel disease. *Med Hypotheses.* 2020; 140: 109665.
33. Sitnikova K, Dijkstra-Kersten SMA, Mokkink LB, et al. Systematic review of measurement properties of questionnaires measuring somatization in primary care patients. *J Psychosom Res.* 2017; 103: 42-62.
34. Regev S, Odes S, Slonim-Nevo V, et al. Differential relationships of somatization, depression, and anxiety to severity of Crohn's disease. *J Health Psychol.* 2021; 26: 2390-401.
35. Goldring AB, Taylor SE, Kemeny ME, et al. Impact of health beliefs, quality of life, and the physician-patient relationship on the treatment intentions of inflammatory bowel disease patients. *Health Psychol.* 2002; 21: 219-28.
36. Veilleux S, Noiseux I, Lachapelle N, et al. Patients' perception of their involvement in shared treatment decision making: Key factors in the treatment of inflammatory bowel disease. *Patient Educ Couns.* 2018; 101: 331-39.
37. Goodhand JR, Wahed M, Mawdsley JE, et al. Mood disorders in inflammatory bowel disease: relation to diagnosis, disease activity, perceived stress, and other factors. *Inflamm Bowel Dis.* 2012; 18: 2301-9.
38. Mules TC, Swaminathan A, Hirschfeld E, et al. The impact of disease activity on psychological symptoms and quality of life in patients with inflammatory bowel disease-results from the Stress, Anxiety and Depression with Disease Activity (SADD) Study. *Aliment Pharmacol Ther.* 2022; 55: 201-11.
39. Peppas S, Pansieri C, Piovani D, et al. The Brain-Gut Axis: Psychological Functioning and Inflammatory Bowel Diseases. *J Clin Med.* 2021; 10.
40. Feng L, Zhou N, Li Z, et al. Co-occurrence of gut microbiota dysbiosis and bile acid metabolism alteration is associated with psychological disorders in Crohn's disease. *FASEB J.* 2022; 36: e22100.
41. Panara AJ, Yarur AJ, Rieders B, et al. The incidence and risk factors for developing depression after being diagnosed with inflammatory bowel disease: a cohort study. *Aliment Pharmacol Ther.* 2014; 39: 802-10.

- 1  
2  
3 42. Maconi G, Gridavilla D, Viganò C, et al. Perianal disease is associated with psychiatric co-morbidity in  
4 Crohn's disease in remission. *Int J Colorectal Dis.* 2014; 29: 1285-90.  
5 43. Nahon S, Lahmek P, Durance C, et al. Risk factors of anxiety and depression in inflammatory bowel  
6 disease. *Inflamm Bowel Dis.* 2012; 18: 2086-91.  
7 44. Freitas TH, Andreoulakis E, Alves GS, et al. Associations of sense of coherence with psychological  
8 distress and quality of life in inflammatory bowel disease. *World J Gastroenterol.* 2015; 21: 6713-27.  
9 45. Kappelman MD, Rifas-Shiman SL, Kleinman K, et al. The prevalence and geographic distribution of  
10 Crohn's disease and ulcerative colitis in the United States. *Clin Gastroenterol Hepatol.* 2007; 5: 1424-9.  
11 46. Benchimol EI, Manuel DG, Guttman A, et al. Changing age demographics of inflammatory bowel  
12 disease in Ontario, Canada: a population-based cohort study of epidemiology trends. *Inflamm Bowel Dis.*  
13 2014; 20: 1761-9.  
14 47. Bernstein CN, Wajda A, Svenson LW, et al. The epidemiology of inflammatory bowel disease in  
15 Canada: a population-based study. *Am J Gastroenterol.* 2006; 101: 1559-68.  
16 48. Slonim-Nevo V, Sarid O, Friger M, et al. Effect of Social Support on Psychological Distress and Disease  
17 Activity in Inflammatory Bowel Disease Patients. *Inflamm Bowel Dis.* 2018; 24: 1389-400.  
18 49. Barreiro-de Acosta M, Molero A, Artime E, et al. Epidemiological, Clinical, Patient-Reported and  
19 Economic Burden of Inflammatory Bowel Disease (Ulcerative colitis and Crohn's disease) in Spain: A  
20 Systematic Review. *Adv Ther.* 2023; 40: 1975-2014.  
21 50. Lophaven SN, Lynge E, Burisch J. The incidence of inflammatory bowel disease in Denmark 1980-  
22 2013: a nationwide cohort study. *Aliment Pharmacol Ther.* 2017; 45: 961-72.  
23 51. Kim SH, Park Y, Kim SP, et al. Shift to a Younger Age and Regional Differences in Inflammatory Bowel  
24 Disease in Korea: Using Healthcare Administrative Data. *Dig Dis Sci.* 2022; 67: 5079-89.  
25 52. Sood A, Kaur K, Mahajan R, et al. Colitis and Crohn's Foundation (India): a first nationwide  
26 inflammatory bowel disease registry. *Intest Res.* 2021; 19: 206-16.  
27 53. Li X, Song P, Li J, et al. The Disease Burden and Clinical Characteristics of Inflammatory Bowel Disease  
28 in the Chinese Population: A Systematic Review and Meta-Analysis. *Int J Env Res Public Health.* 2017; 14.  
29  
30  
31  
32  
33  
34  
35  
36  
37  
38  
39  
40  
41  
42  
43  
44  
45  
46  
47  
48  
49  
50  
51  
52  
53  
54  
55  
56  
57  
58  
59  
60



Figure 1: Flow diagram of the enrolled patients.

150x94mm (149 x 149 DPI)



Figure 2. Analysis of the correlation of clinical data with social support and psychological factors.

192x165mm (143 x 143 DPI)

## Supplementary materials

Table 1. Baseline characteristics of the study population of different genders

| Characteristics                   | Male<br>(n=95) | Female<br>(n=67) | P value |
|-----------------------------------|----------------|------------------|---------|
| Age                               | 32±11          | 34±14            | 0.311   |
| Disease activity (active)         | 57 (60.0%)     | 36 (53.7%)       | 0.427   |
| Body Mass Index                   | 20.0±4.3       | 19.7±3.6         | 0.641   |
| Employment status                 | -              | -                |         |
| no                                | 26 (27.4%)     | 22 (32.8%)       | 0.448   |
| retired                           | 4 (4.2%)       | 5 (7.5%)         |         |
| yes                               | 65 (68.4%)     | 40 (59.7%)       |         |
| Living status                     | -              | -                |         |
| alone                             | 5 (5.3%)       | 4 (6.0%)         | 0.847   |
| with others                       | 90 (94.7%)     | 63 (94.0%)       |         |
| Education                         | -              | -                |         |
| up to 6 years                     | 4 (4.2%)       | 5 (7.5%)         | 0.776   |
| up to 9 years                     | 26 (27.4%)     | 20 (29.8%)       |         |
| up to 12 years                    | 48 (50.5%)     | 30 (44.8%)       |         |
| college                           | 17 (17.9%)     | 12 (17.9%)       |         |
| Marital status                    | -              | -                |         |
| married/cohabitating              | 52 (54.7%)     | 35 (52.2%)       | 0.736   |
| widowed/divorced                  | 8 (8.4%)       | 4 (6.0%)         |         |
| single                            | 35 (36.9%)     | 28 (41.8%)       |         |
| Montreal location                 | -              | -                |         |
| Ileal (L1)                        | 33 (34.7%)     | 30 (44.8%)       | 0.674   |
| Colonic (L2)                      | 12 (12.6%)     | 8 (11.9%)        |         |
| Ileocolon (L3)                    | 45 (47.4%)     | 27 (40.3%)       |         |
| upper gastrointestinal tract (L4) | 1 (1.1%)       | 0 (0%)           |         |
| L4+L1/L2/L3                       | 4 (4.2%)       | 2 (3.0%)         |         |
| Perianal disease                  | 36 (37.9%)     | 27 (40.3%)       | 0.757   |
| Current therapy                   | -              | -                |         |
| no treatment                      | 0 (0%)         | 2 (3.0%)         | 0.497   |
| corticosteroids                   | 9 (9.5%)       | 6 (8.9%)         |         |
| 5-aminosalicylates                | 20 (21.1%)     | 18 (26.9%)       |         |
| immunomodulators                  | 29 (30.5%)     | 20 (29.9%)       |         |
| antitumor necrosis factor         | 17 (17.8%)     | 8 (11.9%)        |         |
| combined therapy                  | 20 (21.1%)     | 13 (19.4%)       |         |
| Anemia                            | -              | -                |         |
| no                                | 63 (66.3%)     | 28 (41.8%)       | 0.021   |
| mild                              | 27 (28.4%)     | 32 (47.8%)       |         |
| moderate                          | 4 (4.2%)       | 5 (7.5%)         |         |
| severe                            | 1 (1.1%)       | 2 (2.9%)         |         |
| Relapses in the last year         | -              | -                |         |
| 0                                 | 26 (27.4%)     | 22 (32.8%)       | 0.020   |
| 1-2                               | 42 (44.2%)     | 39 (58.2%)       |         |
| 3                                 | 12 (12.6%)     | 4 (6.0%)         |         |
| ≥4                                | 15 (15.8%)     | 2 (3.0%)         |         |
| Disease duration (months)         | 13±25          | 11±19            | 0.582   |
| C-reactive protein                | 13.2±24.7      | 11.5±18.5        | 0.634   |

Note: Data are presented as the number (%) or mean±standard deviation. CD, Crohn's disease.



1  
2  
3  
4  
5  
6  
7  
8  
9  
10  
11  
12  
13  
14  
15  
16  
17  
18  
19  
20  
21  
22  
23  
24  
25  
26  
27  
28  
29  
30  
31  
32  
33  
34  
35  
36  
37  
38  
39  
40  
41  
42  
43  
44  
45  
46  
47  
48  
49  
50  
51  
52  
53  
54  
55  
56  
57  
58  
59  
60STROBE Statement—Checklist of items that should be included in reports of *cross-sectional studies*

|                              | <b>Item No</b> | <b>Recommendation</b>                                                                                                                                                                             |
|------------------------------|----------------|---------------------------------------------------------------------------------------------------------------------------------------------------------------------------------------------------|
| <b>Title and abstract</b>    | 1              | (a) Indicate the study's design with a commonly used term in the title or the abstract                                                                                                            |
|                              | Yes            | (b) Provide in the abstract an informative and balanced summary of what was done and what was found                                                                                               |
| <b>Introduction</b>          |                |                                                                                                                                                                                                   |
| Background/rationale         | 2              | Explain the scientific background and rationale for the investigation being reported                                                                                                              |
|                              | Yes            |                                                                                                                                                                                                   |
| Objectives                   | 3              | State specific objectives, including any prespecified hypotheses                                                                                                                                  |
|                              | Yes            |                                                                                                                                                                                                   |
| <b>Methods</b>               |                |                                                                                                                                                                                                   |
| Study design                 | 4              | Present key elements of study design early in the paper                                                                                                                                           |
|                              | Yes            |                                                                                                                                                                                                   |
| Setting                      | 5              | Describe the setting, locations, and relevant dates, including periods of recruitment, exposure, follow-up, and data collection                                                                   |
|                              | Yes            |                                                                                                                                                                                                   |
| Participants                 | 6              | (a) Give the eligibility criteria, and the sources and methods of selection of participants                                                                                                       |
|                              | Yes            |                                                                                                                                                                                                   |
| Variables                    | 7              | Clearly define all outcomes, exposures, predictors, potential confounders, and effect modifiers. Give diagnostic criteria, if applicable                                                          |
|                              | Yes            |                                                                                                                                                                                                   |
| Data sources/<br>measurement | 8*             | For each variable of interest, give sources of data and details of methods of assessment (measurement). Describe comparability of assessment methods if there is more than one group              |
|                              | Yes            |                                                                                                                                                                                                   |
| Bias                         | 9              | Describe any efforts to address potential sources of bias                                                                                                                                         |
|                              | Yes            |                                                                                                                                                                                                   |
| Study size                   | 10             | Explain how the study size was arrived at                                                                                                                                                         |
|                              | Yes            |                                                                                                                                                                                                   |
| Quantitative variables       | 11             | Explain how quantitative variables were handled in the analyses. If applicable, describe which groupings were chosen and why                                                                      |
|                              | Yes            |                                                                                                                                                                                                   |
| Statistical methods          | 12             | (a) Describe all statistical methods, including those used to control for confounding                                                                                                             |
|                              | Yes            | (b) Describe any methods used to examine subgroups and interactions                                                                                                                               |
|                              |                | (c) Explain how missing data were addressed                                                                                                                                                       |
|                              |                | (d) If applicable, describe analytical methods taking account of sampling strategy                                                                                                                |
|                              |                | (e) Describe any sensitivity analyses                                                                                                                                                             |
| <b>Results</b>               |                |                                                                                                                                                                                                   |
| Participants                 | 13*            | (a) Report numbers of individuals at each stage of study—eg numbers potentially eligible, examined for eligibility, confirmed eligible, included in the study, completing follow-up, and analysed |
|                              | Yes            | (b) Give reasons for non-participation at each stage                                                                                                                                              |
|                              |                | (c) Consider use of a flow diagram                                                                                                                                                                |
| Descriptive data             | 14*            | (a) Give characteristics of study participants (eg demographic, clinical, social) and information on exposures and potential confounders                                                          |
|                              | Yes            | (b) Indicate number of participants with missing data for each variable of interest                                                                                                               |
| Outcome data                 | 15*            | Report numbers of outcome events or summary measures                                                                                                                                              |
|                              | Yes            |                                                                                                                                                                                                   |
| Main results                 | 16             | (a) Give unadjusted estimates and, if applicable, confounder-adjusted estimates and their precision (eg, 95% confidence interval). Make clear which confounders were                              |
|                              | Yes            |                                                                                                                                                                                                   |



|                          |           |                                                                                                                                                                            |
|--------------------------|-----------|----------------------------------------------------------------------------------------------------------------------------------------------------------------------------|
|                          |           | adjusted for and why they were included                                                                                                                                    |
|                          |           | (b) Report category boundaries when continuous variables were categorized                                                                                                  |
|                          |           | (c) If relevant, consider translating estimates of relative risk into absolute risk for a meaningful time period                                                           |
| Other analyses           | 17<br>Yes | Report other analyses done—eg analyses of subgroups and interactions, and sensitivity analyses                                                                             |
| <b>Discussion</b>        |           |                                                                                                                                                                            |
| Key results              | 18<br>Yes | Summarise key results with reference to study objectives                                                                                                                   |
| Limitations              | 19<br>Yes | Discuss limitations of the study, taking into account sources of potential bias or imprecision. Discuss both direction and magnitude of any potential bias                 |
| Interpretation           | 20<br>Yes | Give a cautious overall interpretation of results considering objectives, limitations, multiplicity of analyses, results from similar studies, and other relevant evidence |
| Generalisability         | 21<br>Yes | Discuss the generalisability (external validity) of the study results                                                                                                      |
| <b>Other information</b> |           |                                                                                                                                                                            |
| Funding                  | 22<br>Yes | Give the source of funding and the role of the funders for the present study and, if applicable, for the original study on which the present article is based              |

\*Give information separately for exposed and unexposed groups.

**Note:** An Explanation and Elaboration article discusses each checklist item and gives methodological background and published examples of transparent reporting. The STROBE checklist is best used in conjunction with this article (freely available on the Web sites of PLoS Medicine at <http://www.plosmedicine.org/>, Annals of Internal Medicine at <http://www.annals.org/>, and Epidemiology at <http://www.epidem.com/>). Information on the STROBE Initiative is available at [www.strobe-statement.org](http://www.strobe-statement.org).
