# Supplementary material for: Is disease activity associated with social support and psychological distress in Crohn’s disease patients? Results of a cross-sectional study in a Chinese hospital population
Source: PubMed Central journal article supplement — BMJ Open. 2023 Oct 25;13(10):e076219. doi: 10.1136/bmjopen-2023-076219 (PMC10603502; doi:10.1136/bmjopen-2023-076219), 2023-10-25
Supplement: bmjopen-2023-076219supp001.pdf [file bmjopen-2023-076219supp001.pdf]

## Supplementary materials

Table 1. Baseline characteristics of the study population of different genders

| Characteristics                   | Male<br>(n=95) | Female<br>(n=67) | P value |
|-----------------------------------|----------------|------------------|---------|
| Age                               | 32±11          | 34±14            | 0.311   |
| Disease activity (active)         | 57 (60.0%)     | 36 (53.7%)       | 0.427   |
| Body Mass Index                   | 20.0±4.3       | 19.7±3.6         | 0.641   |
| Employment status                 | -              | -                |         |
| no                                | 26 (27.4%)     | 22 (32.8%)       | 0.448   |
| retired                           | 4 (4.2%)       | 5 (7.5%)         |         |
| yes                               | 65 (68.4%)     | 40 (59.7%)       |         |
| Living status                     | -              | -                |         |
| alone                             | 5 (5.3%)       | 4 (6.0%)         | 0.847   |
| with others                       | 90 (94.7%)     | 63 (94.0%)       |         |
| Education                         | -              | -                |         |
| up to 6 years                     | 4 (4.2%)       | 5 (7.5%)         | 0.776   |
| up to 9 years                     | 26 (27.4%)     | 20 (29.8%)       |         |
| up to 12 years                    | 48 (50.5%)     | 30 (44.8%)       |         |
| college                           | 17 (17.9%)     | 12 (17.9%)       |         |
| Marital status                    | -              | -                |         |
| married/cohabitating              | 52 (54.7%)     | 35 (52.2%)       | 0.736   |
| widowed/divorced                  | 8 (8.4%)       | 4 (6.0%)         |         |
| single                            | 35 (36.9%)     | 28 (41.8%)       |         |
| Montreal location                 | -              | -                |         |
| Ileal (L1)                        | 33 (34.7%)     | 30 (44.8%)       | 0.674   |
| Colonic (L2)                      | 12 (12.6%)     | 8 (11.9%)        |         |
| Ileocolon (L3)                    | 45 (47.4%)     | 27 (40.3%)       |         |
| upper gastrointestinal tract (L4) | 1 (1.1%)       | 0 (0%)           |         |
| L4+L1/L2/L3                       | 4 (4.2%)       | 2 (3.0%)         |         |
| Perianal disease                  | 36 (37.9%)     | 27 (40.3%)       | 0.757   |
| Current therapy                   | -              | -                |         |
| no treatment                      | 0 (0%)         | 2 (3.0%)         | 0.497   |
| corticosteroids                   | 9 (9.5%)       | 6 (8.9%)         |         |
| 5-aminosalicylates                | 20 (21.1%)     | 18 (26.9%)       |         |
| immunomodulators                  | 29 (30.5%)     | 20 (29.9%)       |         |
| antitumor necrosis factor         | 17 (17.8%)     | 8 (11.9%)        |         |
| combined therapy                  | 20 (21.1%)     | 13 (19.4%)       |         |
| Anemia                            | -              | -                |         |
| no                                | 63 (66.3%)     | 28 (41.8%)       | 0.021   |
| mild                              | 27 (28.4%)     | 32 (47.8%)       |         |
| moderate                          | 4 (4.2%)       | 5 (7.5%)         |         |
| severe                            | 1 (1.1%)       | 2 (2.9%)         |         |
| Relapses in the last year         | -              | -                |         |
| 0                                 | 26 (27.4%)     | 22 (32.8%)       | 0.020   |
| 1-2                               | 42 (44.2%)     | 39 (58.2%)       |         |
| 3                                 | 12 (12.6%)     | 4 (6.0%)         |         |
| ≥4                                | 15 (15.8%)     | 2 (3.0%)         |         |
| Disease duration (months)         | 13±25          | 11±19            | 0.582   |
| C-reactive protein                | 13.2±24.7      | 11.5±18.5        | 0.634   |

Note: Data are presented as the number (%) or mean±standard deviation. CD, Crohn's disease.
